# Supplementary material for: A kinase-independent function of PAK is crucial for pathogen-mediated actin remodelling
Source: PLoS Pathog. 2021 Aug 30;17(8):e1009902. doi: 10.1371/journal.ppat.1009902 (PMC8432889; doi:10.1371/journal.ppat.1009902)
Supplement: S1 Data — (XLSX) [file ppat.1009902.s008.xlsx]

## Sheet: Mass Spec Data PSB vs PSB-CPP
P556_Anthony_Davidson (2), Samples report created on 07/15/2021
Experiment: P556_Anthony_Davidson (2)
	Peak List Generator: unknown
		Version: unknown
		Charge States Calculated: unknown
		Deisotoped: unknown
		Textual Annotation: unknown
	Database Set: 1 Database
		Database Name: the cRAP_20190401.fasta; CCP_UniProt_homo_sapiens_proteome_20180409 database
			Version: unknown
			Taxonomy: All Entries
			Number of Proteins: 93732
		Does database contain common contaminants?: unknown
	Search Engine Set: 1 Search Engine
		Search Engine: Mascot
			Version: 2.6.2
			Samples: All Samples
			Fragment Tolerance: 0.100 Da (Monoisotopic)
			Parent Tolerance: 20 PPM (Monoisotopic)
			Fixed Modifications: +57 on C (Carbamidomethyl)
			Variable Modifications: +1 on NQ (Deamidated), +16 on M (Oxidation)
			Database: the cRAP_20190401.fasta; CCP_UniProt_homo_sapiens_proteome_20180409 database (unknown version, 93732 entries)
			Digestion Enzyme: Trypsin
			Max Missed Cleavages: 2
			Probability Model:
				P556_Em1 (En1_F003277): Peptide Prophet with Delta Mass Correction (No decoys found) [all charge states]
				P556_Em2 (En2_F003280): Peptide Prophet with Delta Mass Correction (No decoys found) [all charge states]
				P556_PP1 (PP1_F003281): Peptide Prophet with Delta Mass Correction (No decoys found) [all charge states]
				P556_PP2 (PP2_F003282): Peptide Prophet with Delta Mass Correction (No decoys found) [all charge states]
	Scaffold: Version: Scaffold_4.9.0
		Modification Metadata Set: 2334 modifications
			Source: C:\Program Files\Scaffold 4\parameters\unimod.xml
			Comment:
		Protein Grouping Strategy: Experiment-wide grouping with protein cluster analysis
		Peptide Thresholds: 95.0% minimum
		Protein Thresholds: 95.0% minimum and 2 peptides minimum
		Peptide FDR: 0.3% (Prophet)
		Protein FDR: 11.3% (Prophet)
		GO Annotation Source(s):
		Pathway Annotation Source(s): Unknown
		Alternate ID Source(s): FASTA:UniProt/Swiss-Prot (UniProtKB)
									Total Spectrum Count	Total Spectrum Count	Total Spectrum Count	Total Spectrum Count
P556_Anthony_Davidson (2)									PSB1	PSB2	PSB-CPP1	PSB-CPP2
#	Visible?	Starred?	Identified Proteins (1371/1372)	Accession Number	Alternate ID	Molecular Weight	Protein Grouping Ambiguity	Taxonomy	PSB1	PSB2	PSB-CPP1	PSB-CPP2
1	TRUE	Empty	Cluster of Vimentin OS=Homo sapiens OX=9606 GN=VIM PE=1 SV=4 (VIME_HUMAN)	VIME_HUMAN [19]		54 kDa	TRUE	unknown	194	209	157	160
1.1	TRUE	Empty	Vimentin OS=Homo sapiens OX=9606 GN=VIM PE=1 SV=4	VIME_HUMAN		54 kDa	TRUE	unknown	140	149	101	96
1.2	TRUE	Empty	Isoform 2 of Keratin, type II cytoskeletal 8 OS=Homo sapiens OX=9606 GN=KRT8	sp|P05787-2|K2C8_HUMAN (+1)		57 kDa	TRUE	unknown	41	46	38	37
1.3	TRUE	Empty	Keratin, type II cytoskeletal 2 epidermal OS=Homo sapiens GN=KRT2 PE=1 SV=2	K22E_HUMAN	KRT2	65 kDa	TRUE	unknown	9	8	9	15
1.4	TRUE	Empty	Keratin, type II cytoskeletal 6A OS=Homo sapiens OX=9606 GN=KRT6A PE=1 SV=3	K2C6A_HUMAN		60 kDa	TRUE	unknown	8	10	12	12
1.5	TRUE	Empty	Keratin, type II cytoskeletal 5 OS=Homo sapiens OX=9606 GN=KRT5 PE=1 SV=3	K2C5_HUMAN		62 kDa	TRUE	unknown	6	6	12	15
1.6	TRUE	Empty	Glial fibrillary acidic protein (Fragment) OS=Homo sapiens OX=9606 GN=GFAP PE=1 SV=1	A0A1W2PQU7_HUMAN		3 kDa	TRUE	unknown	0	11	0	0
1.7	TRUE	Empty	Keratin, type II cytoskeletal 3 OS=Homo sapiens OX=9606 GN=KRT3 PE=1 SV=3	K2C3_HUMAN		64 kDa	TRUE	unknown	3	3	0	0
1.8	TRUE	Empty	Keratin, type II cytoskeletal 7 OS=Homo sapiens OX=9606 GN=KRT7 PE=1 SV=5	K2C7_HUMAN		51 kDa	TRUE	unknown	0	0	0	0
1.9	TRUE	Empty	Isoform 2 of Neurofilament heavy polypeptide OS=Homo sapiens OX=9606 GN=NEFH	sp|P12036-2|NFH_HUMAN (+1)		106 kDa	TRUE	unknown	0	0	0	0
1.1	TRUE	Empty	Keratin, type II cuticular Hb4 OS=Homo sapiens GN=KRT84 PE=2 SV=2	KRT84_HUMAN	KRT84	65 kDa	TRUE	unknown	0	0	0	0
1.11	TRUE	Empty	Keratin, type II cytoskeletal 75 OS=Homo sapiens OX=9606 GN=KRT75 PE=1 SV=2	K2C75_HUMAN		60 kDa	TRUE	unknown	0	0	0	0
1.12	TRUE	Empty	Isoform 2 of Glial fibrillary acidic protein OS=Homo sapiens OX=9606 GN=GFAP	sp|P14136-2|GFAP_HUMAN		50 kDa	TRUE	unknown	0	0	0	0
1.13	TRUE	Empty	Keratin, type II cytoskeletal 4 OS=Homo sapiens OX=9606 GN=KRT4 PE=1 SV=4	K2C4_HUMAN		57 kDa	TRUE	unknown	0	0	0	0
1.14	TRUE	Empty	Tau-tubulin kinase OS=Homo sapiens OX=9606 GN=TTBK2 PE=1 SV=1	Q8IWY7_HUMAN		182 kDa	TRUE	unknown	0	0	0	0
1.15	TRUE	Empty	Neurofilament medium polypeptide OS=Homo sapiens OX=9606 GN=NEFM PE=1 SV=1	E7ESP9_HUMAN (+1)		98 kDa	TRUE	unknown	0	0	0	0
1.16	TRUE	Empty	Alpha-internexin OS=Homo sapiens OX=9606 GN=INA PE=1 SV=2	AINX_HUMAN		55 kDa	TRUE	unknown	0	0	0	0
2	TRUE	Empty	Cluster of Tubulin alpha-1C chain OS=Homo sapiens OX=9606 GN=TUBA1C PE=1 SV=1 (A0A1W2PQM2_HUMAN)	A0A1W2PQM2_HUMAN [6]		37 kDa	TRUE	unknown	117	150	116	116
2.1	TRUE	Empty	Tubulin alpha-1C chain OS=Homo sapiens OX=9606 GN=TUBA1C PE=1 SV=1	A0A1W2PQM2_HUMAN		37 kDa	TRUE	unknown	99	107	85	89
2.2	TRUE	Empty	Isoform 2 of Tubulin alpha-4A chain OS=Homo sapiens OX=9606 GN=TUBA4A	sp|P68366-2|TBA4A_HUMAN (+1)		48 kDa	TRUE	unknown	25	50	41	36
2.3	TRUE	Empty	Tubulin alpha-1B chain OS=Homo sapiens OX=9606 GN=TUBA1B PE=1 SV=1	sp|P68363|TBA1B_HUMAN		50 kDa	TRUE	unknown	111	131	103	104
2.4	TRUE	Empty	Isoform 2 of Tubulin alpha chain-like 3 OS=Homo sapiens OX=9606 GN=TUBAL3	sp|A6NHL2-2|TBAL3_HUMAN (+1)		46 kDa	TRUE	unknown	1	2	3	2
3	TRUE	Empty	Cluster of Tubulin beta chain OS=Homo sapiens OX=9606 GN=TUBB PE=1 SV=2 (TBB5_HUMAN)	TBB5_HUMAN [8]		50 kDa	TRUE	unknown	67	91	80	74
3.1	TRUE	Empty	Tubulin beta chain OS=Homo sapiens OX=9606 GN=TUBB PE=1 SV=2	TBB5_HUMAN		50 kDa	TRUE	unknown	57	79	63	60
3.2	TRUE	Empty	Tubulin beta-6 chain OS=Homo sapiens OX=9606 GN=TUBB6 PE=1 SV=1	TBB6_HUMAN		50 kDa	TRUE	unknown	7	13	13	13
3.3	TRUE	Empty	Tubulin beta-2A chain OS=Homo sapiens OX=9606 GN=TUBB2A PE=1 SV=1	TBB2A_HUMAN		50 kDa	TRUE	unknown	50	65	58	53
3.4	TRUE	Empty	Tubulin beta-4B chain OS=Homo sapiens OX=9606 GN=TUBB4B PE=1 SV=1	TBB4B_HUMAN		50 kDa	TRUE	unknown	46	63	59	54
3.5	TRUE	Empty	Tubulin beta chain (Fragment) OS=Homo sapiens OX=9606 GN=TUBB4A PE=1 SV=1	M0R042_HUMAN		16 kDa	TRUE	unknown	5	7	6	5
3.6	TRUE	Empty	Tubulin beta-3 chain OS=Homo sapiens OX=9606 GN=TUBB3 PE=1 SV=2	sp|Q13509|TBB3_HUMAN		50 kDa	TRUE	unknown	39	51	49	42
3.7	TRUE	Empty	Tubulin beta-4A chain (Fragment) OS=Homo sapiens OX=9606 GN=TUBB4A PE=1 SV=1	M0R2D3_HUMAN		17 kDa	TRUE	unknown	0	0	0	0
3.8	TRUE	Empty	Tubulin beta chain (Fragment) OS=Homo sapiens OX=9606 GN=TUBB6 PE=1 SV=1	K7ESM5_HUMAN		37 kDa	TRUE	unknown	0	0	0	0
4	TRUE	Empty	Desmoplakin OS=Homo sapiens OX=9606 GN=DSP PE=1 SV=3	sp|P15924|DESP_HUMAN		332 kDa		unknown	73	99	73	76
5	TRUE	Empty	Cluster of Actin, cytoplasmic 1 OS=Homo sapiens OX=9606 GN=ACTB PE=1 SV=1 (ACTB_HUMAN)	ACTB_HUMAN [9]		42 kDa	TRUE	unknown	56	68	32	50
5.1	TRUE	Empty	Actin, cytoplasmic 1 OS=Homo sapiens OX=9606 GN=ACTB PE=1 SV=1	ACTB_HUMAN (+1)		42 kDa	TRUE	unknown	52	64	28	46
5.2	TRUE	Empty	Actin, alpha cardiac muscle 1 OS=Homo sapiens OX=9606 GN=ACTC1 PE=1 SV=1	ACTC_HUMAN		42 kDa	TRUE	unknown	44	48	21	36
5.3	TRUE	Empty	Beta-actin-like protein 2 OS=Homo sapiens OX=9606 GN=ACTBL2 PE=1 SV=2	ACTBL_HUMAN		42 kDa	TRUE	unknown	41	39	13	27
5.4	TRUE	Empty	Actin, cytoplasmic 2 (Fragment) OS=Homo sapiens OX=9606 GN=ACTG1 PE=1 SV=1	I3L3R2_HUMAN		18 kDa	TRUE	unknown	12	17	11	11
5.5	TRUE	Empty	POTE ankyrin domain family member F OS=Homo sapiens OX=9606 GN=POTEF PE=1 SV=2	POTEF_HUMAN		121 kDa	TRUE	unknown	19	21	9	18
5.6	TRUE	Empty	Putative beta-actin-like protein 3 OS=Homo sapiens OX=9606 GN=POTEKP PE=5 SV=1	ACTBM_HUMAN		42 kDa	TRUE	unknown	0	0	0	0
5.7	TRUE	Empty	POTE ankyrin domain family member B3 (Fragment) OS=Homo sapiens OX=9606 GN=POTEB3 PE=4 SV=1	A0A0G2JRD4_HUMAN		30 kDa	TRUE	unknown	0	0	0	0
5.8	TRUE	Empty	Actin, gamma-enteric smooth muscle OS=Homo sapiens OX=9606 GN=ACTG2 PE=1 SV=1	F8WB63_HUMAN		11 kDa	TRUE	unknown	0	0	0	0
6	TRUE	Empty	Serine/arginine repetitive matrix protein 2 OS=Homo sapiens OX=9606 GN=SRRM2 PE=1 SV=2	sp|Q9UQ35|SRRM2_HUMAN		300 kDa		unknown	49	59	109	98
7	TRUE	Empty	Transferrin receptor protein 1 OS=Homo sapiens OX=9606 GN=TFRC PE=1 SV=2	TFR1_HUMAN		85 kDa		unknown	51	77	55	49
8	TRUE	Empty	Nestin OS=Homo sapiens OX=9606 GN=NES PE=1 SV=2	NEST_HUMAN		177 kDa		unknown	63	66	66	64
9	TRUE	Empty	Cluster of Plectin OS=Homo sapiens OX=9606 GN=PLEC PE=1 SV=3 (sp|Q15149|PLEC_HUMAN)	sp|Q15149|PLEC_HUMAN [4]		532 kDa	TRUE	unknown	62	66	41	48
9.1	TRUE	Empty	Plectin OS=Homo sapiens OX=9606 GN=PLEC PE=1 SV=3	sp|Q15149|PLEC_HUMAN		532 kDa	TRUE	unknown	62	66	41	48
9.2	TRUE	Empty	Microtubule-actin cross-linking factor 1, isoforms 1/2/3/5 OS=Homo sapiens OX=9606 GN=MACF1 PE=1 SV=1	H3BPE1_HUMAN (+1)		857 kDa	TRUE	unknown	0	0	0	0
9.3	TRUE	Empty	Plectin (Fragment) OS=Homo sapiens OX=9606 GN=PLEC PE=1 SV=1	E9PQ28_HUMAN		10 kDa	TRUE	unknown	0	0	0	0
10	TRUE	Empty	Neuroblast differentiation-associated protein AHNAK OS=Homo sapiens OX=9606 GN=AHNAK PE=1 SV=2	AHNK_HUMAN		629 kDa		unknown	77	76	5	11
11	TRUE	Empty	Cytoplasmic dynein 1 heavy chain 1 OS=Homo sapiens OX=9606 GN=DYNC1H1 PE=1 SV=5	DYHC1_HUMAN		532 kDa		unknown	29	46	39	33
12	TRUE	Empty	Cluster of Heat shock protein HSP 90-beta OS=Homo sapiens OX=9606 GN=HSP90AB1 PE=1 SV=4 (HS90B_HUMAN)	HS90B_HUMAN [4]		83 kDa	TRUE	unknown	34	43	52	47
12.1	TRUE	Empty	Heat shock protein HSP 90-beta OS=Homo sapiens OX=9606 GN=HSP90AB1 PE=1 SV=4	HS90B_HUMAN		83 kDa	TRUE	unknown	23	31	33	34
12.2	TRUE	Empty	Isoform 2 of Heat shock protein HSP 90-alpha OS=Homo sapiens OX=9606 GN=HSP90AA1	sp|P07900-2|HS90A_HUMAN (+1)		98 kDa	TRUE	unknown	20	25	35	27
12.3	TRUE	Empty	Putative heat shock protein HSP 90-alpha A5 OS=Homo sapiens OX=9606 GN=HSP90AA5P PE=2 SV=1	HS905_HUMAN		39 kDa	TRUE	unknown	0	0	0	0
13	TRUE	Empty	Cluster of Keratin, type I cytoskeletal 17 OS=Homo sapiens OX=9606 GN=KRT17 PE=1 SV=2 (K1C17_HUMAN)	K1C17_HUMAN [5]		48 kDa	TRUE	unknown	45	47	44	50
13.1	TRUE	Empty	Keratin, type I cytoskeletal 17 OS=Homo sapiens OX=9606 GN=KRT17 PE=1 SV=2	K1C17_HUMAN		48 kDa	TRUE	unknown	36	36	22	23
13.2	TRUE	Empty	Keratin, type I cytoskeletal 10 OS=Homo sapiens GN=KRT10 PE=1 SV=6	K1C10_HUMAN	KRT10	59 kDa	TRUE	unknown	7	7	16	21
13.3	TRUE	Empty	Keratin, type I cytoskeletal 16 OS=Homo sapiens OX=9606 GN=KRT16 PE=1 SV=4	K1C16_HUMAN		51 kDa	TRUE	unknown	4	8	10	8
13.4	TRUE	Empty	Keratin, type I cytoskeletal 14 OS=Homo sapiens OX=9606 GN=KRT14 PE=1 SV=4	K1C14_HUMAN		52 kDa	TRUE	unknown	12	15	11	13
13.5	TRUE	Empty	Keratin, type I cytoskeletal 25 OS=Homo sapiens OX=9606 GN=KRT25 PE=1 SV=1	K1C25_HUMAN		49 kDa	TRUE	unknown	0	0	0	0
14	TRUE	Empty	Brain acid soluble protein 1 OS=Homo sapiens OX=9606 GN=BASP1 PE=1 SV=2	sp|P80723|BASP1_HUMAN		23 kDa		unknown	48	42	39	43
15	TRUE	Empty	Endoplasmic reticulum chaperone BiP OS=Homo sapiens OX=9606 GN=HSPA5 PE=1 SV=2	BIP_HUMAN		72 kDa	TRUE	unknown	43	47	42	43
16	TRUE	Empty	Isoform 3 of Vacuolar protein sorting-associated protein 13C OS=Homo sapiens OX=9606 GN=VPS13C	sp|Q709C8-3|VP13C_HUMAN (+1)		417 kDa		unknown	33	47	22	17
17	TRUE	Empty	Cluster of Isoform 2 of Calnexin OS=Homo sapiens OX=9606 GN=CANX (sp|P27824-2|CALX_HUMAN)	sp|P27824-2|CALX_HUMAN [3]		72 kDa	TRUE	unknown	33	32	35	32
17.1	TRUE	Empty	Isoform 2 of Calnexin OS=Homo sapiens OX=9606 GN=CANX	sp|P27824-2|CALX_HUMAN (+1)		72 kDa	TRUE	unknown	33	32	34	32
17.2	TRUE	Empty	Calnexin (Fragment) OS=Homo sapiens OX=9606 GN=CANX PE=1 SV=1	D6RB85_HUMAN		16 kDa	TRUE	unknown	4	0	8	4
18	TRUE	Empty	Cluster of Ras GTPase-activating-like protein IQGAP1 OS=Homo sapiens OX=9606 GN=IQGAP1 PE=1 SV=1 (IQGA1_HUMAN)	IQGA1_HUMAN [3]		189 kDa	TRUE	unknown	25	38	31	29
18.1	TRUE	Empty	Ras GTPase-activating-like protein IQGAP1 OS=Homo sapiens OX=9606 GN=IQGAP1 PE=1 SV=1	IQGA1_HUMAN		189 kDa	TRUE	unknown	25	38	31	29
18.2	TRUE	Empty	Ras GTPase-activating-like protein IQGAP3 OS=Homo sapiens OX=9606 GN=IQGAP3 PE=1 SV=1	F2Z2E2_HUMAN (+1)		179 kDa	TRUE	unknown	0	0	0	0
19	TRUE	Empty	Serine/arginine repetitive matrix protein 1 OS=Homo sapiens OX=9606 GN=SRRM1 PE=1 SV=1	A9Z1X7_HUMAN		103 kDa		unknown	27	32	40	36
20	TRUE	Empty	Cluster of Clathrin heavy chain OS=Homo sapiens OX=9606 GN=CLTC PE=1 SV=1 (A0A087WVQ6_HUMAN)	A0A087WVQ6_HUMAN [4]		192 kDa	TRUE	unknown	32	37	22	28
20.1	TRUE	Empty	Clathrin heavy chain OS=Homo sapiens OX=9606 GN=CLTC PE=1 SV=1	A0A087WVQ6_HUMAN (+2)		192 kDa	TRUE	unknown	32	37	22	28
20.2	TRUE	Empty	Clathrin heavy chain 1 (Fragment) OS=Homo sapiens OX=9606 GN=CLTC PE=1 SV=1	K7EJJ5_HUMAN		26 kDa	TRUE	unknown	0	0	0	0
21	TRUE	Empty	Unconventional myosin-XVIIIa OS=Homo sapiens OX=9606 GN=MYO18A PE=1 SV=1	A0A0D9SFK2_HUMAN (+2)		231 kDa		unknown	39	43	13	15
22	TRUE	Empty	Thyroid hormone receptor-associated protein 3 OS=Homo sapiens OX=9606 GN=THRAP3 PE=1 SV=2	TR150_HUMAN		109 kDa	TRUE	unknown	12	21	42	38
23	TRUE	Empty	Cluster of Endoplasmin OS=Homo sapiens OX=9606 GN=HSP90B1 PE=1 SV=1 (ENPL_HUMAN)	ENPL_HUMAN [2]		92 kDa	TRUE	unknown	25	31	24	29
23.1	TRUE	Empty	Endoplasmin OS=Homo sapiens OX=9606 GN=HSP90B1 PE=1 SV=1	ENPL_HUMAN		92 kDa	TRUE	unknown	25	31	23	28
23.2	TRUE	Empty	Endoplasmin (Fragment) OS=Homo sapiens OX=9606 GN=HSP90B1 PE=1 SV=1	H0YIV0_HUMAN		17 kDa	TRUE	unknown	0	0	2	2
24	TRUE	Empty	Cluster of Isoform 2 of Bcl-2-associated transcription factor 1 OS=Homo sapiens OX=9606 GN=BCLAF1 (sp|Q9NYF8-2|BCLF1_HUMAN)	sp|Q9NYF8-2|BCLF1_HUMAN [4]		106 kDa	TRUE	unknown	20	22	38	38
24.1	TRUE	Empty	Isoform 2 of Bcl-2-associated transcription factor 1 OS=Homo sapiens OX=9606 GN=BCLAF1	sp|Q9NYF8-2|BCLF1_HUMAN (+1)		106 kDa	TRUE	unknown	20	22	37	38
24.2	TRUE	Empty	Bcl-2-associated transcription factor 1 OS=Homo sapiens OX=9606 GN=BCLAF1 PE=1 SV=1	E9PK91_HUMAN (+1)		100 kDa	TRUE	unknown	19	21	35	35
25	TRUE	Empty	Glyceraldehyde-3-phosphate dehydrogenase OS=Homo sapiens OX=9606 GN=GAPDH PE=1 SV=3	sp|P04406|G3P_HUMAN		36 kDa		unknown	20	26	30	23
26	TRUE	Empty	Sarcoplasmic/endoplasmic reticulum calcium ATPase 2 OS=Homo sapiens OX=9606 GN=ATP2A2 PE=1 SV=1	sp|P16615|AT2A2_HUMAN		115 kDa		unknown	22	29	21	25
27	TRUE	Empty	Cluster of Isoform 2 of Neutral alpha-glucosidase AB OS=Homo sapiens OX=9606 GN=GANAB (sp|Q14697-2|GANAB_HUMAN)	sp|Q14697-2|GANAB_HUMAN [2]		109 kDa	TRUE	unknown	23	26	28	23
27.1	TRUE	Empty	Isoform 2 of Neutral alpha-glucosidase AB OS=Homo sapiens OX=9606 GN=GANAB	sp|Q14697-2|GANAB_HUMAN		109 kDa	TRUE	unknown	21	24	28	23
27.2	TRUE	Empty	Neutral alpha-glucosidase AB OS=Homo sapiens OX=9606 GN=GANAB PE=1 SV=3	sp|Q14697|GANAB_HUMAN		107 kDa	TRUE	unknown	22	25	27	22
28	TRUE	Empty	Isoform 2 of Kinectin OS=Homo sapiens OX=9606 GN=KTN1	sp|Q86UP2-2|KTN1_HUMAN (+2)		150 kDa		unknown	27	28	18	24
29	TRUE	Empty	Pinin OS=Homo sapiens OX=9606 GN=PNN PE=1 SV=5	PININ_HUMAN		82 kDa		unknown	10	14	35	31
30	TRUE	Empty	Isoform 2 of Golgin subfamily B member 1 OS=Homo sapiens OX=9606 GN=GOLGB1	sp|Q14789-2|GOGB1_HUMAN (+3)		377 kDa		unknown	25	25	15	19
31	TRUE	Empty	Dolichyl-diphosphooligosaccharide--protein glycosyltransferase subunit 1 OS=Homo sapiens OX=9606 GN=RPN1 PE=1 SV=1	RPN1_HUMAN		69 kDa		unknown	21	26	25	25
32	TRUE	Empty	Isoform 2 of Inverted formin-2 OS=Homo sapiens OX=9606 GN=INF2	sp|Q27J81-2|INF2_HUMAN (+1)		135 kDa		unknown	23	26	21	23
33	TRUE	Empty	Protein disulfide-isomerase A4 OS=Homo sapiens OX=9606 GN=PDIA4 PE=1 SV=2	PDIA4_HUMAN		73 kDa	TRUE	unknown	21	21	21	21
34	TRUE	Empty	Protein disulfide-isomerase OS=Homo sapiens OX=9606 GN=P4HB PE=1 SV=3	PDIA1_HUMAN		57 kDa		unknown	16	22	22	23
35	TRUE	Empty	Isoform 3 of Carbamoyl-phosphate synthase [ammonia], mitochondrial OS=Homo sapiens OX=9606 GN=CPS1	sp|P31327-3|CPSM_HUMAN (+1)		166 kDa	TRUE	unknown	11	21	21	26
36	TRUE	Empty	Cluster of Apoptotic chromatin condensation inducer in the nucleus OS=Homo sapiens OX=9606 GN=ACIN1 PE=1 SV=1 (S4R3H4_HUMAN)	S4R3H4_HUMAN [2]		145 kDa	TRUE	unknown	4	4	37	36
36.1	TRUE	Empty	Apoptotic chromatin condensation inducer in the nucleus OS=Homo sapiens OX=9606 GN=ACIN1 PE=1 SV=1	S4R3H4_HUMAN		145 kDa	TRUE	unknown	4	4	35	35
36.2	TRUE	Empty	Isoform 4 of Apoptotic chromatin condensation inducer in the nucleus OS=Homo sapiens OX=9606 GN=ACIN1	sp|Q9UKV3-5|ACINU_HUMAN		151 kDa	TRUE	unknown	4	4	34	34
37	TRUE	Empty	Cluster of Heat shock cognate 71 kDa protein OS=Homo sapiens OX=9606 GN=HSPA8 PE=1 SV=1 (sp|P11142|HSP7C_HUMAN)	sp|P11142|HSP7C_HUMAN [3]		71 kDa	TRUE	unknown	20	23	24	24
37.1	TRUE	Empty	Heat shock cognate 71 kDa protein OS=Homo sapiens OX=9606 GN=HSPA8 PE=1 SV=1	sp|P11142|HSP7C_HUMAN		71 kDa	TRUE	unknown	19	23	23	23
37.2	TRUE	Empty	Heat shock cognate 71 kDa protein (Fragment) OS=Homo sapiens OX=9606 GN=HSPA8 PE=1 SV=8	E9PK54_HUMAN		20 kDa	TRUE	unknown	7	9	9	8
37.3	TRUE	Empty	Heat shock cognate 71 kDa protein (Fragment) OS=Homo sapiens OX=9606 GN=HSPA8 PE=1 SV=1	E9PN89_HUMAN		35 kDa	TRUE	unknown	13	14	17	15
38	TRUE	Empty	Cluster of Heterogeneous nuclear ribonucleoprotein M OS=Homo sapiens OX=9606 GN=HNRNPM PE=1 SV=1 (A0A087X0X3_HUMAN)	A0A087X0X3_HUMAN [6]		78 kDa	TRUE	unknown	9	12	23	20
38.1	TRUE	Empty	Heterogeneous nuclear ribonucleoprotein M OS=Homo sapiens OX=9606 GN=HNRNPM PE=1 SV=1	A0A087X0X3_HUMAN (+2)		78 kDa	TRUE	unknown	9	12	21	19
38.2	TRUE	Empty	Heterogeneous nuclear ribonucleoprotein M (Fragment) OS=Homo sapiens OX=9606 GN=HNRNPM PE=1 SV=1	M0QZM1_HUMAN		40 kDa	TRUE	unknown	6	5	14	13
38.3	TRUE	Empty	Heterogeneous nuclear ribonucleoprotein M (Fragment) OS=Homo sapiens OX=9606 GN=HNRNPM PE=1 SV=8	M0R019_HUMAN		38 kDa	TRUE	unknown	0	0	0	0
38.4	TRUE	Empty	Heterogeneous nuclear ribonucleoprotein M (Fragment) OS=Homo sapiens OX=9606 GN=HNRNPM PE=1 SV=1	M0QY96_HUMAN		12 kDa	TRUE	unknown	0	0	0	0
39	TRUE	Empty	Golgi integral membrane protein 4 OS=Homo sapiens OX=9606 GN=GOLIM4 PE=1 SV=1	GOLI4_HUMAN		82 kDa		unknown	24	26	14	16
40	TRUE	Empty	Isoform 2 of DNA-dependent protein kinase catalytic subunit OS=Homo sapiens OX=9606 GN=PRKDC	sp|P78527-2|PRKDC_HUMAN (+1)		466 kDa		unknown	12	21	12	14
41	TRUE	Empty	Hornerin OS=Homo sapiens OX=9606 GN=HRNR PE=1 SV=2	HORN_HUMAN		282 kDa		unknown	14	12	19	21
42	TRUE	Empty	Keratin, type I cytoskeletal 9 OS=Homo sapiens GN=KRT9 PE=1 SV=3	K1C9_HUMAN	KRT9	62 kDa	TRUE	unknown	19	17	17	24
43	TRUE	Empty	Protein ERGIC-53 OS=Homo sapiens OX=9606 GN=LMAN1 PE=1 SV=2	LMAN1_HUMAN		58 kDa		unknown	17	19	20	17
44	TRUE	Empty	Early endosome antigen 1 OS=Homo sapiens OX=9606 GN=EEA1 PE=1 SV=2	EEA1_HUMAN		162 kDa		unknown	31	37	0	0
45	TRUE	Empty	Protein transport protein sec16 OS=Homo sapiens OX=9606 GN=SEC16A PE=1 SV=1	J3KNL6_HUMAN		252 kDa		unknown	17	22	13	13
46	TRUE	Empty	Peroxisomal multifunctional enzyme type 2 OS=Homo sapiens OX=9606 GN=HSD17B4 PE=1 SV=3	sp|P51659|DHB4_HUMAN		80 kDa		unknown	15	20	18	19
47	TRUE	Empty	Cluster of Probable ATP-dependent RNA helicase DDX5 OS=Homo sapiens OX=9606 GN=DDX5 PE=1 SV=1 (J3KTA4_HUMAN)	J3KTA4_HUMAN [8]		69 kDa	TRUE	unknown	16	17	19	18
47.1	TRUE	Empty	Probable ATP-dependent RNA helicase DDX5 OS=Homo sapiens OX=9606 GN=DDX5 PE=1 SV=1	J3KTA4_HUMAN (+2)		69 kDa	TRUE	unknown	14	16	17	16
47.2	TRUE	Empty	Probable ATP-dependent RNA helicase DDX17 OS=Homo sapiens OX=9606 GN=DDX17 PE=1 SV=1	A0A1W2PQ51_HUMAN (+4)		80 kDa	TRUE	unknown	5	6	8	7
48	TRUE	Empty	Keratin, type II cytoskeletal 1 OS=Homo sapiens GN=KRT1 PE=1 SV=6	K2C1_HUMAN	KRT1	66 kDa	TRUE	unknown	25	28	31	43
49	TRUE	Empty	Cluster of Protein disulfide-isomerase A3 OS=Homo sapiens OX=9606 GN=PDIA3 PE=1 SV=4 (PDIA3_HUMAN)	PDIA3_HUMAN [2]		57 kDa	TRUE	unknown	17	18	21	21
49.1	TRUE	Empty	Protein disulfide-isomerase A3 OS=Homo sapiens OX=9606 GN=PDIA3 PE=1 SV=4	PDIA3_HUMAN		57 kDa	TRUE	unknown	15	17	19	20
49.2	TRUE	Empty	Protein disulfide-isomerase A3 (Fragment) OS=Homo sapiens OX=9606 GN=PDIA3 PE=1 SV=1	H7BZJ3_HUMAN		14 kDa	TRUE	unknown	4	4	5	4
50	TRUE	Empty	Isoform Short of Long-chain-fatty-acid--CoA ligase 4 OS=Homo sapiens OX=9606 GN=ACSL4	sp|O60488-2|ACSL4_HUMAN (+1)		74 kDa	TRUE	unknown	20	22	18	15
51	TRUE	Empty	DnaJ homolog subfamily A member 1 OS=Homo sapiens OX=9606 GN=DNAJA1 PE=1 SV=2	sp|P31689|DNJA1_HUMAN		45 kDa		unknown	16	20	18	16
52	TRUE	Empty	Cluster of Melanoma-associated antigen D2 OS=Homo sapiens OX=9606 GN=MAGED2 PE=1 SV=2 (sp|Q9UNF1|MAGD2_HUMAN)	sp|Q9UNF1|MAGD2_HUMAN [2]		65 kDa	TRUE	unknown	18	21	14	14
52.1	TRUE	Empty	Melanoma-associated antigen D2 OS=Homo sapiens OX=9606 GN=MAGED2 PE=1 SV=2	sp|Q9UNF1|MAGD2_HUMAN		65 kDa	TRUE	unknown	18	20	14	14
52.2	TRUE	Empty	Melanoma antigen family D, 2, isoform CRA_d OS=Homo sapiens OX=9606 GN=MAGED2 PE=1 SV=1	Q5H907_HUMAN		56 kDa	TRUE	unknown	16	17	12	12
53	TRUE	Empty	Transport and Golgi organization protein 1 homolog OS=Homo sapiens OX=9606 GN=MIA3 PE=1 SV=1	sp|Q5JRA6|TGO1_HUMAN		214 kDa		unknown	16	18	11	14
54	TRUE	Empty	Extended synaptotagmin-1 OS=Homo sapiens OX=9606 GN=ESYT1 PE=1 SV=1	sp|Q9BSJ8|ESYT1_HUMAN		123 kDa		unknown	10	17	15	16
55	TRUE	Empty	Lanosterol synthase OS=Homo sapiens OX=9606 GN=LSS PE=1 SV=1	sp|P48449|ERG7_HUMAN		83 kDa		unknown	11	18	16	20
56	TRUE	Empty	Cluster of Rho guanine nucleotide exchange factor 7 OS=Homo sapiens OX=9606 GN=ARHGEF7 PE=1 SV=1 (B1ALK7_HUMAN)	B1ALK7_HUMAN [4]		80 kDa	TRUE	unknown	1	1	32	29
56.1	TRUE	Empty	Rho guanine nucleotide exchange factor 7 OS=Homo sapiens OX=9606 GN=ARHGEF7 PE=1 SV=1	B1ALK7_HUMAN (+2)		80 kDa	TRUE	unknown	1	1	31	29
56.2	TRUE	Empty	Rho guanine nucleotide exchange factor 7 (Fragment) OS=Homo sapiens OX=9606 GN=ARHGEF7 PE=1 SV=1	F6SJA5_HUMAN		15 kDa	TRUE	unknown	0	0	6	0
57	TRUE	Empty	Extended synaptotagmin-2 (Fragment) OS=Homo sapiens OX=9606 GN=ESYT2 PE=1 SV=1	H7BXI1_HUMAN		98 kDa		unknown	9	25	17	14
58	TRUE	Empty	60 kDa heat shock protein, mitochondrial OS=Homo sapiens OX=9606 GN=HSPD1 PE=1 SV=2	sp|P10809|CH60_HUMAN		61 kDa		unknown	15	13	13	16
59	TRUE	Empty	Cluster of Pyruvate kinase PKM OS=Homo sapiens OX=9606 GN=PKM PE=1 SV=4 (sp|P14618|KPYM_HUMAN)	sp|P14618|KPYM_HUMAN [2]		58 kDa	TRUE	unknown	10	15	21	16
59.1	TRUE	Empty	Pyruvate kinase PKM OS=Homo sapiens OX=9606 GN=PKM PE=1 SV=4	sp|P14618|KPYM_HUMAN		58 kDa	TRUE	unknown	10	15	21	16
59.2	TRUE	Empty	Pyruvate kinase PKLR OS=Homo sapiens OX=9606 GN=PKLR PE=1 SV=2	sp|P30613|KPYR_HUMAN		62 kDa	TRUE	unknown	0	0	0	0
60	TRUE	Empty	Isoform 3 of Myoferlin OS=Homo sapiens OX=9606 GN=MYOF	sp|Q9NZM1-3|MYOF_HUMAN (+2)		233 kDa		unknown	17	22	8	12
61	TRUE	Empty	Cell division control protein 42 homolog OS=Homo sapiens OX=9606 GN=CDC42 PE=1 SV=2	sp|P60953|CDC42_HUMAN		21 kDa	TRUE	unknown	12	10	20	20
62	TRUE	Empty	Alkyldihydroxyacetonephosphate synthase, peroxisomal OS=Homo sapiens OX=9606 GN=AGPS PE=1 SV=1	ADAS_HUMAN		73 kDa		unknown	14	17	15	12
63	TRUE	Empty	Elongation factor 2 OS=Homo sapiens OX=9606 GN=EEF2 PE=1 SV=4	EF2_HUMAN		95 kDa	TRUE	unknown	8	14	23	16
64	TRUE	Empty	Calreticulin OS=Homo sapiens OX=9606 GN=CALR PE=1 SV=1	CALR_HUMAN		48 kDa		unknown	17	15	15	14
65	TRUE	Empty	Cluster of Endoplasmic reticulum export factor CTAGE5 OS=Homo sapiens OX=9606 GN=CTAGE5 PE=4 SV=1 (G3V599_HUMAN)	G3V599_HUMAN [9]		152 kDa	TRUE	unknown	14	19	13	13
65.1	TRUE	Empty	Endoplasmic reticulum export factor CTAGE5 OS=Homo sapiens OX=9606 GN=CTAGE5 PE=4 SV=1	G3V599_HUMAN (+6)		152 kDa	TRUE	unknown	14	19	13	13
65.2	TRUE	Empty	cTAGE family member 6 OS=Homo sapiens OX=9606 GN=CTAGE6 PE=2 SV=2	CTGE6_HUMAN (+1)		88 kDa	TRUE	unknown	0	0	0	0
66	TRUE	Empty	Peptidyl-prolyl cis-trans isomerase B OS=Homo sapiens OX=9606 GN=PPIB PE=1 SV=2	PPIB_HUMAN		24 kDa		unknown	8	14	15	14
67	TRUE	Empty	Cluster of Isoform 4 of Sodium/potassium-transporting ATPase subunit alpha-1 OS=Homo sapiens OX=9606 GN=ATP1A1 (sp|P05023-4|AT1A1_HUMAN)	sp|P05023-4|AT1A1_HUMAN [5]		113 kDa	TRUE	unknown	7	15	8	18
67.1	TRUE	Empty	Isoform 4 of Sodium/potassium-transporting ATPase subunit alpha-1 OS=Homo sapiens OX=9606 GN=ATP1A1	sp|P05023-4|AT1A1_HUMAN (+1)		113 kDa	TRUE	unknown	7	15	8	18
67.2	TRUE	Empty	Sodium/potassium-transporting ATPase subunit alpha-2 OS=Homo sapiens OX=9606 GN=ATP1A2 PE=1 SV=1	AT1A2_HUMAN (+1)		112 kDa	TRUE	unknown	0	0	0	0
67.3	TRUE	Empty	Potassium-transporting ATPase alpha chain 1 OS=Homo sapiens OX=9606 GN=ATP4A PE=2 SV=5	ATP4A_HUMAN		114 kDa	TRUE	unknown	0	0	0	0
68	TRUE	Empty	Keratin, type I cytoskeletal 18 OS=Homo sapiens OX=9606 GN=KRT18 PE=1 SV=2	K1C18_HUMAN		48 kDa	TRUE	unknown	14	17	15	16
69	TRUE	Empty	Cluster of Isoform 2 of G patch domain-containing protein 8 OS=Homo sapiens OX=9606 GN=GPATCH8 (sp|Q9UKJ3-2|GPTC8_HUMAN)	sp|Q9UKJ3-2|GPTC8_HUMAN [3]		155 kDa	TRUE	unknown	0	0	31	26
69.1	TRUE	Empty	Isoform 2 of G patch domain-containing protein 8 OS=Homo sapiens OX=9606 GN=GPATCH8	sp|Q9UKJ3-2|GPTC8_HUMAN (+1)		155 kDa	TRUE	unknown	0	0	31	26
69.2	TRUE	Empty	Zinc finger protein 804B OS=Homo sapiens OX=9606 GN=ZNF804B PE=2 SV=2	Z804B_HUMAN		153 kDa	TRUE	unknown	0	0	0	0
70	TRUE	Empty	CCR4-NOT transcription complex subunit 1 OS=Homo sapiens OX=9606 GN=CNOT1 PE=1 SV=2	sp|A5YKK6|CNOT1_HUMAN		267 kDa		unknown	9	14	13	12
71	TRUE	Empty	Isoform 4 of Perilipin-3 OS=Homo sapiens OX=9606 GN=PLIN3	sp|O60664-4|PLIN3_HUMAN (+1)		46 kDa		unknown	13	15	18	17
72	TRUE	Empty	Cluster of Pumilio homolog 1 OS=Homo sapiens OX=9606 GN=PUM1 PE=1 SV=1 (Q5T1Z4_HUMAN)	Q5T1Z4_HUMAN [7]		127 kDa	TRUE	unknown	9	18	16	12
72.1	TRUE	Empty	Pumilio homolog 1 OS=Homo sapiens OX=9606 GN=PUM1 PE=1 SV=1	Q5T1Z4_HUMAN (+3)		127 kDa	TRUE	unknown	9	16	14	11
72.2	TRUE	Empty	Pumilio homolog 2 OS=Homo sapiens OX=9606 GN=PUM2 PE=1 SV=1	A0A0A0MR59_HUMAN (+1)		100 kDa	TRUE	unknown	2	5	4	4
72.3	TRUE	Empty	Pumilio homolog 1 OS=Homo sapiens OX=9606 GN=PUM1 PE=1 SV=3	sp|Q14671|PUM1_HUMAN		126 kDa	TRUE	unknown	9	15	14	11
73	TRUE	Empty	Cluster of Liprin-alpha-1 OS=Homo sapiens OX=9606 GN=PPFIA1 PE=1 SV=1 (sp|Q13136|LIPA1_HUMAN)	sp|Q13136|LIPA1_HUMAN [5]		136 kDa	TRUE	unknown	22	28	4	4
73.1	TRUE	Empty	Liprin-alpha-1 OS=Homo sapiens OX=9606 GN=PPFIA1 PE=1 SV=1	sp|Q13136|LIPA1_HUMAN		136 kDa	TRUE	unknown	22	28	4	4
73.2	TRUE	Empty	Isoform 2 of Liprin-alpha-3 OS=Homo sapiens OX=9606 GN=PPFIA3	sp|O75145-2|LIPA3_HUMAN (+1)		132 kDa	TRUE	unknown	0	0	0	0
73.3	TRUE	Empty	Liprin-alpha-4 OS=Homo sapiens OX=9606 GN=PPFIA4 PE=1 SV=2	B1APN9_HUMAN (+1)		134 kDa	TRUE	unknown	0	0	0	0
74	TRUE	Empty	Protein diaphanous homolog 1 OS=Homo sapiens OX=9606 GN=DIAPH1 PE=1 SV=1	A0A0G2JH68_HUMAN (+1)		141 kDa		unknown	17	21	9	8
75	TRUE	Empty	Heat shock 70 kDa protein 1B OS=Homo sapiens OX=9606 GN=HSPA1B PE=1 SV=1	A0A0G2JIW1_HUMAN (+2)		70 kDa	TRUE	unknown	11	14	15	16
76	TRUE	Empty	Trypsin OS=Sus scrofa PE=1 SV=1	TRYP_PIG		24 kDa		unknown	11	12	18	17
77	TRUE	Empty	Cluster of Isoform 3 of AP-2 complex subunit beta OS=Homo sapiens OX=9606 GN=AP2B1 (sp|P63010-3|AP2B1_HUMAN)	sp|P63010-3|AP2B1_HUMAN [5]		98 kDa	TRUE	unknown	12	17	11	9
77.1	TRUE	Empty	Isoform 3 of AP-2 complex subunit beta OS=Homo sapiens OX=9606 GN=AP2B1	sp|P63010-3|AP2B1_HUMAN		98 kDa	TRUE	unknown	9	14	10	7
77.2	TRUE	Empty	Isoform B of AP-1 complex subunit beta-1 OS=Homo sapiens OX=9606 GN=AP1B1	sp|Q10567-2|AP1B1_HUMAN (+3)		104 kDa	TRUE	unknown	9	8	7	5
78	TRUE	Empty	Cluster of Eukaryotic translation initiation factor 4 gamma 1 OS=Homo sapiens OX=9606 GN=EIF4G1 PE=1 SV=1 (E7EUU4_HUMAN)	E7EUU4_HUMAN [14]		172 kDa	TRUE	unknown	10	9	12	14
78.1	TRUE	Empty	Eukaryotic translation initiation factor 4 gamma 1 OS=Homo sapiens OX=9606 GN=EIF4G1 PE=1 SV=1	E7EUU4_HUMAN (+8)		172 kDa	TRUE	unknown	9	8	12	14
78.2	TRUE	Empty	Eukaryotic translation initiation factor 4 gamma 1 (Fragment) OS=Homo sapiens OX=9606 GN=EIF4G1 PE=1 SV=1	C9JF13_HUMAN		98 kDa	TRUE	unknown	0	0	0	0
78.3	TRUE	Empty	Eukaryotic translation initiation factor 4 gamma 3 OS=Homo sapiens OX=9606 GN=EIF4G3 PE=1 SV=1	A0A0U1RQK7_HUMAN (+3)		195 kDa	TRUE	unknown	0	0	0	0
79	TRUE	Empty	Cluster of Moesin OS=Homo sapiens OX=9606 GN=MSN PE=1 SV=3 (MOES_HUMAN)	MOES_HUMAN [5]		68 kDa	TRUE	unknown	14	13	9	11
79.1	TRUE	Empty	Moesin OS=Homo sapiens OX=9606 GN=MSN PE=1 SV=3	MOES_HUMAN		68 kDa	TRUE	unknown	11	8	6	9
79.2	TRUE	Empty	Ezrin OS=Homo sapiens OX=9606 GN=EZR PE=1 SV=3	E7EQR4_HUMAN (+1)		69 kDa	TRUE	unknown	7	7	6	5
79.3	TRUE	Empty	Isoform 5 of Radixin OS=Homo sapiens OX=9606 GN=RDX	sp|P35241-5|RADI_HUMAN (+1)		71 kDa	TRUE	unknown	7	6	3	5
80	TRUE	Empty	Ras-related protein Rab-7a OS=Homo sapiens OX=9606 GN=RAB7A PE=1 SV=1	RAB7A_HUMAN		23 kDa		unknown	12	17	11	11
81	TRUE	Empty	Cluster of Nuclease-sensitive element-binding protein 1 OS=Homo sapiens OX=9606 GN=YBX1 PE=1 SV=3 (YBOX1_HUMAN)	YBOX1_HUMAN [4]		36 kDa	TRUE	unknown	8	13	17	16
81.1	TRUE	Empty	Nuclease-sensitive element-binding protein 1 OS=Homo sapiens OX=9606 GN=YBX1 PE=1 SV=3	YBOX1_HUMAN		36 kDa	TRUE	unknown	7	10	15	13
81.2	TRUE	Empty	Isoform 2 of Y-box-binding protein 3 OS=Homo sapiens OX=9606 GN=YBX3	sp|P16989-2|YBOX3_HUMAN (+1)		32 kDa	TRUE	unknown	2	6	9	9
81.3	TRUE	Empty	Y-box-binding protein 2 OS=Homo sapiens OX=9606 GN=YBX2 PE=1 SV=2	YBOX2_HUMAN		39 kDa	TRUE	unknown	0	0	0	0
82	TRUE	Empty	Cluster of HLA class I histocompatibility antigen, B-8 alpha chain OS=Homo sapiens OX=9606 GN=HLA-B PE=1 SV=1 (1B08_HUMAN)	1B08_HUMAN [11]		40 kDa	TRUE	unknown	18	26	20	22
82.1	TRUE	Empty	HLA class I histocompatibility antigen, B-8 alpha chain OS=Homo sapiens OX=9606 GN=HLA-B PE=1 SV=1	1B08_HUMAN (+1)		40 kDa	TRUE	unknown	6	13	9	9
82.2	TRUE	Empty	HLA class I histocompatibility antigen, Cw-6 alpha chain OS=Homo sapiens OX=9606 GN=HLA-C PE=1 SV=2	1C06_HUMAN (+1)		41 kDa	TRUE	unknown	13	19	15	18
82.3	TRUE	Empty	HLA class I histocompatibility antigen, Cw-2 alpha chain OS=Homo sapiens OX=9606 GN=HLA-C PE=1 SV=1	1C02_HUMAN		41 kDa	TRUE	unknown	9	13	10	11
82.4	TRUE	Empty	HLA class I histocompatibility antigen, alpha chain F OS=Homo sapiens OX=9606 GN=HLA-F PE=1 SV=1	A0A0G2JH66_HUMAN (+5)		50 kDa	TRUE	unknown	0	0	0	0
83	TRUE	Empty	NADPH--cytochrome P450 reductase (Fragment) OS=Homo sapiens OX=9606 GN=POR PE=1 SV=1	H0Y4R2_HUMAN (+1)		82 kDa		unknown	13	14	13	15
84	TRUE	Empty	Eukaryotic translation initiation factor 2 subunit 3 OS=Homo sapiens OX=9606 GN=EIF2S3 PE=1 SV=3	IF2G_HUMAN		51 kDa		unknown	11	13	10	13
85	TRUE	Empty	Splicing factor 3B subunit 2 OS=Homo sapiens OX=9606 GN=SF3B2 PE=1 SV=2	SF3B2_HUMAN		100 kDa		unknown	7	7	16	14
86	TRUE	Empty	Cluster of Isoform 5 of Pericentriolar material 1 protein OS=Homo sapiens OX=9606 GN=PCM1 (sp|Q15154-5|PCM1_HUMAN)	sp|Q15154-5|PCM1_HUMAN [3]		228 kDa	TRUE	unknown	11	19	10	14
86.1	TRUE	Empty	Isoform 5 of Pericentriolar material 1 protein OS=Homo sapiens OX=9606 GN=PCM1	sp|Q15154-5|PCM1_HUMAN (+1)		228 kDa	TRUE	unknown	9	19	10	13
86.2	TRUE	Empty	Pericentriolar material 1 protein (Fragment) OS=Homo sapiens OX=9606 GN=PCM1 PE=1 SV=1	E7EV93_HUMAN		84 kDa	TRUE	unknown	3	0	0	3
87	TRUE	Empty	Cluster of ARF GTPase-activating protein GIT1 OS=Homo sapiens OX=9606 GN=GIT1 PE=1 SV=2 (sp|Q9Y2X7|GIT1_HUMAN)	sp|Q9Y2X7|GIT1_HUMAN [2]		84 kDa	TRUE	unknown	1	0	28	20
87.1	TRUE	Empty	ARF GTPase-activating protein GIT1 OS=Homo sapiens OX=9606 GN=GIT1 PE=1 SV=2	sp|Q9Y2X7|GIT1_HUMAN		84 kDa	TRUE	unknown	1	0	28	20
87.2	TRUE	Empty	ARF GTPase-activating protein GIT1 (Fragment) OS=Homo sapiens OX=9606 GN=GIT1 PE=1 SV=1	J3QQI0_HUMAN		16 kDa	TRUE	unknown	0	0	0	0
88	TRUE	Empty	Isoform 3 of Plasminogen activator inhibitor 1 RNA-binding protein OS=Homo sapiens OX=9606 GN=SERBP1	sp|Q8NC51-3|PAIRB_HUMAN (+1)		43 kDa		unknown	13	13	15	10
89	TRUE	Empty	Cluster of HLA class I histocompatibility antigen, A-68 alpha chain OS=Homo sapiens OX=9606 GN=HLA-A PE=1 SV=4 (1A68_HUMAN)	1A68_HUMAN [3]		41 kDa	TRUE	unknown	14	25	20	22
89.1	TRUE	Empty	HLA class I histocompatibility antigen, A-68 alpha chain OS=Homo sapiens OX=9606 GN=HLA-A PE=1 SV=4	1A68_HUMAN		41 kDa	TRUE	unknown	13	20	16	18
89.2	TRUE	Empty	HLA class I histocompatibility antigen, A-69 alpha chain OS=Homo sapiens OX=9606 GN=HLA-A PE=1 SV=2	1A69_HUMAN		41 kDa	TRUE	unknown	11	21	16	20
89.3	TRUE	Empty	HLA class I histocompatibility antigen, A-34 alpha chain OS=Homo sapiens OX=9606 GN=HLA-A PE=1 SV=1	1A34_HUMAN		41 kDa	TRUE	unknown	10	16	11	15
90	TRUE	Empty	Heat shock protein beta-1 OS=Homo sapiens OX=9606 GN=HSPB1 PE=1 SV=2	HSPB1_HUMAN		23 kDa		unknown	13	13	14	13
91	TRUE	Empty	Serine/threonine-protein kinase PRP4 homolog OS=Homo sapiens OX=9606 GN=PRPF4B PE=1 SV=3	PRP4B_HUMAN		117 kDa		unknown	0	1	24	23
92	TRUE	Empty	Serpin H1 OS=Homo sapiens OX=9606 GN=SERPINH1 PE=1 SV=2	SERPH_HUMAN		46 kDa		unknown	8	14	14	17
93	TRUE	Empty	ATP synthase subunit beta, mitochondrial OS=Homo sapiens OX=9606 GN=ATP5F1B PE=1 SV=3	ATPB_HUMAN		57 kDa		unknown	10	14	15	16
94	TRUE	Empty	Isoform 2 of Protein disulfide-isomerase A6 OS=Homo sapiens OX=9606 GN=PDIA6	sp|Q15084-2|PDIA6_HUMAN (+4)		54 kDa		unknown	9	16	12	12
95	TRUE	Empty	Catalase OS=Homo sapiens GN=CAT PE=1 SV=3	CATA_HUMAN	CAT	60 kDa		unknown	11	12	12	11
96	TRUE	Empty	Cluster of Transforming protein RhoA OS=Homo sapiens OX=9606 GN=RHOA PE=1 SV=1 (RHOA_HUMAN)	RHOA_HUMAN [4]		22 kDa	TRUE	unknown	12	14	16	16
96.1	TRUE	Empty	Transforming protein RhoA OS=Homo sapiens OX=9606 GN=RHOA PE=1 SV=1	RHOA_HUMAN		22 kDa	TRUE	unknown	12	13	15	16
96.2	TRUE	Empty	Rho-related GTP-binding protein RhoC (Fragment) OS=Homo sapiens OX=9606 GN=RHOC PE=1 SV=8	Q5JR08_HUMAN (+1)		22 kDa	TRUE	unknown	6	7	9	9
96.3	TRUE	Empty	Rho-related GTP-binding protein RhoC OS=Homo sapiens OX=9606 GN=RHOC PE=4 SV=1	Q5JR05_HUMAN		22 kDa	TRUE	unknown	0	0	0	0
97	TRUE	Empty	Reticulocalbin-1 OS=Homo sapiens OX=9606 GN=RCN1 PE=1 SV=1	sp|Q15293|RCN1_HUMAN		39 kDa		unknown	9	12	11	15
98	TRUE	Empty	Cluster of 14-3-3 protein gamma OS=Homo sapiens OX=9606 GN=YWHAG PE=1 SV=2 (1433G_HUMAN)	1433G_HUMAN [6]		28 kDa	TRUE	unknown	11	17	11	14
98.1	TRUE	Empty	14-3-3 protein gamma OS=Homo sapiens OX=9606 GN=YWHAG PE=1 SV=2	1433G_HUMAN		28 kDa	TRUE	unknown	3	7	3	4
98.2	TRUE	Empty	14-3-3 protein zeta/delta OS=Homo sapiens OX=9606 GN=YWHAZ PE=1 SV=1	sp|P63104|1433Z_HUMAN		28 kDa	TRUE	unknown	4	7	5	5
98.3	TRUE	Empty	Isoform Short of 14-3-3 protein beta/alpha OS=Homo sapiens OX=9606 GN=YWHAB	sp|P31946-2|1433B_HUMAN (+1)		28 kDa	TRUE	unknown	5	8	5	4
98.4	TRUE	Empty	14-3-3 protein theta OS=Homo sapiens OX=9606 GN=YWHAQ PE=1 SV=1	1433T_HUMAN		28 kDa	TRUE	unknown	3	6	3	3
98.5	TRUE	Empty	14-3-3 protein eta OS=Homo sapiens OX=9606 GN=YWHAH PE=1 SV=4	1433F_HUMAN		28 kDa	TRUE	unknown	0	0	0	2
99	TRUE	Empty	Cluster of Polyadenylate-binding protein OS=Homo sapiens OX=9606 GN=PABPC1 PE=1 SV=1 (A0A087WTT1_HUMAN)	A0A087WTT1_HUMAN [9]		59 kDa	TRUE	unknown	3	8	17	15
99.1	TRUE	Empty	Polyadenylate-binding protein OS=Homo sapiens OX=9606 GN=PABPC1 PE=1 SV=1	A0A087WTT1_HUMAN (+3)		59 kDa	TRUE	unknown	2	7	15	12
99.2	TRUE	Empty	Polyadenylate-binding protein 1 (Fragment) OS=Homo sapiens OX=9606 GN=PABPC1 PE=1 SV=1	H0YC10_HUMAN		4 kDa	TRUE	unknown	0	1	2	2
99.3	TRUE	Empty	Isoform 2 of Polyadenylate-binding protein 4 OS=Homo sapiens OX=9606 GN=PABPC4	sp|Q13310-2|PABP4_HUMAN (+1)		70 kDa	TRUE	unknown	2	2	5	5
99.4	TRUE	Empty	Polyadenylate-binding protein 4 (Fragment) OS=Homo sapiens OX=9606 GN=PABPC4 PE=1 SV=1	H0YEQ8_HUMAN		13 kDa	TRUE	unknown	2	2	3	4
99.5	TRUE	Empty	Polyadenylate-binding protein 1 (Fragment) OS=Homo sapiens OX=9606 GN=PABPC1 PE=1 SV=1	H0YAR2_HUMAN		32 kDa	TRUE	unknown	0	0	0	0
100	TRUE	Empty	4F2 cell-surface antigen heavy chain OS=Homo sapiens OX=9606 GN=SLC3A2 PE=1 SV=1	F5GZS6_HUMAN (+5)		65 kDa		unknown	8	15	11	13
101	TRUE	Empty	Cluster of Ras-related protein Rab-2A OS=Homo sapiens OX=9606 GN=RAB2A PE=1 SV=1 (sp|P61019|RAB2A_HUMAN)	sp|P61019|RAB2A_HUMAN [2]		24 kDa	TRUE	unknown	6	15	10	14
101.1	TRUE	Empty	Ras-related protein Rab-2A OS=Homo sapiens OX=9606 GN=RAB2A PE=1 SV=1	sp|P61019|RAB2A_HUMAN		24 kDa	TRUE	unknown	5	13	10	13
101.2	TRUE	Empty	Ras-related protein Rab-2B OS=Homo sapiens OX=9606 GN=RAB2B PE=1 SV=1	sp|Q8WUD1|RAB2B_HUMAN		24 kDa	TRUE	unknown	4	10	7	9
102	TRUE	Empty	Low-density lipoprotein receptor (Fragment) OS=Homo sapiens OX=9606 GN=LDLR PE=1 SV=1	J3KMZ9_HUMAN (+4)		105 kDa		unknown	11	15	9	9
103	TRUE	Empty	Cluster of tRNA (cytosine(34)-C(5))-methyltransferase OS=Homo sapiens OX=9606 GN=NSUN2 PE=1 SV=2 (sp|Q08J23|NSUN2_HUMAN)	sp|Q08J23|NSUN2_HUMAN [2]		86 kDa	TRUE	unknown	19	15	10	7
103.1	TRUE	Empty	tRNA (cytosine(34)-C(5))-methyltransferase OS=Homo sapiens OX=9606 GN=NSUN2 PE=1 SV=2	sp|Q08J23|NSUN2_HUMAN		86 kDa	TRUE	unknown	17	13	10	7
103.2	TRUE	Empty	Isoform 3 of tRNA (cytosine(34)-C(5))-methyltransferase OS=Homo sapiens OX=9606 GN=NSUN2	sp|Q08J23-3|NSUN2_HUMAN		59 kDa	TRUE	unknown	12	10	6	5
104	TRUE	Empty	Cluster of Non-specific serine/threonine protein kinase OS=Homo sapiens OX=9606 GN=MARK3 PE=1 SV=1 (A0A0A0MSZ1_HUMAN)	A0A0A0MSZ1_HUMAN [25]		84 kDa	TRUE	unknown	15	15	7	9
104.1	TRUE	Empty	Non-specific serine/threonine protein kinase OS=Homo sapiens OX=9606 GN=MARK3 PE=1 SV=1	A0A0A0MSZ1_HUMAN (+5)		84 kDa	TRUE	unknown	10	11	5	8
104.2	TRUE	Empty	Non-specific serine/threonine protein kinase OS=Homo sapiens OX=9606 GN=MARK2 PE=1 SV=1	E7ETY4_HUMAN (+12)		78 kDa	TRUE	unknown	8	6	4	1
104.3	TRUE	Empty	Non-specific serine/threonine protein kinase OS=Homo sapiens OX=9606 GN=MARK1 PE=1 SV=1	A0A087X0I6_HUMAN (+2)		89 kDa	TRUE	unknown	0	0	0	0
104.4	TRUE	Empty	MAP/microtubule affinity-regulating kinase 3 (Fragment) OS=Homo sapiens OX=9606 GN=MARK3 PE=1 SV=1	A2SY06_HUMAN		37 kDa	TRUE	unknown	0	0	0	0
104.5	TRUE	Empty	Isoform 2 of MAP/microtubule affinity-regulating kinase 4 OS=Homo sapiens OX=9606 GN=MARK4	sp|Q96L34-2|MARK4_HUMAN		75 kDa	TRUE	unknown	0	0	0	0
104.6	TRUE	Empty	MAP/microtubule affinity-regulating kinase 4 (Fragment) OS=Homo sapiens OX=9606 GN=MARK4 PE=4 SV=1	K7EN95_HUMAN		5 kDa	TRUE	unknown	0	0	0	0
105	TRUE	Empty	Keratin, type I cytoskeletal 19 OS=Homo sapiens OX=9606 GN=KRT19 PE=1 SV=4	K1C19_HUMAN		44 kDa	TRUE	unknown	14	15	16	17
106	TRUE	Empty	Bifunctional glutamate/proline--tRNA ligase OS=Homo sapiens OX=9606 GN=EPRS PE=1 SV=5	SYEP_HUMAN		171 kDa		unknown	8	16	10	12
107	TRUE	Empty	Cluster of Putative elongation factor 1-alpha-like 3 OS=Homo sapiens OX=9606 GN=EEF1A1P5 PE=5 SV=1 (EF1A3_HUMAN)	EF1A3_HUMAN [3]		50 kDa	TRUE	unknown	6	12	12	9
107.1	TRUE	Empty	Putative elongation factor 1-alpha-like 3 OS=Homo sapiens OX=9606 GN=EEF1A1P5 PE=5 SV=1	EF1A3_HUMAN (+1)		50 kDa	TRUE	unknown	6	12	12	9
107.2	TRUE	Empty	Elongation factor 1-alpha 2 OS=Homo sapiens OX=9606 GN=EEF1A2 PE=1 SV=1	EF1A2_HUMAN		50 kDa	TRUE	unknown	5	7	8	5
108	TRUE	Empty	Cation-independent mannose-6-phosphate receptor OS=Homo sapiens OX=9606 GN=IGF2R PE=1 SV=3	MPRI_HUMAN		274 kDa		unknown	10	19	4	7
109	TRUE	Empty	Isoform 2 of General vesicular transport factor p115 OS=Homo sapiens OX=9606 GN=USO1	sp|O60763-2|USO1_HUMAN (+1)		109 kDa		unknown	10	10	14	9
110	TRUE	Empty	Isoform 2 of Formin-like protein 1 OS=Homo sapiens OX=9606 GN=FMNL1	sp|O95466-2|FMNL1_HUMAN (+2)		122 kDa	TRUE	unknown	11	18	9	7
111	TRUE	Empty	Cluster of Stress-70 protein, mitochondrial OS=Homo sapiens OX=9606 GN=HSPA9 PE=1 SV=2 (GRP75_HUMAN)	GRP75_HUMAN [2]		74 kDa	TRUE	unknown	10	12	9	11
111.1	TRUE	Empty	Stress-70 protein, mitochondrial OS=Homo sapiens OX=9606 GN=HSPA9 PE=1 SV=2	GRP75_HUMAN		74 kDa	TRUE	unknown	10	12	9	11
111.2	TRUE	Empty	Stress-70 protein, mitochondrial (Fragment) OS=Homo sapiens OX=9606 GN=HSPA9 PE=1 SV=1	H0Y8S0_HUMAN		11 kDa	TRUE	unknown	0	0	0	0
112	TRUE	Empty	Cluster of Ras-related protein Rab-11A OS=Homo sapiens OX=9606 GN=RAB11A PE=1 SV=1 (H3BSC1_HUMAN)	H3BSC1_HUMAN [4]		22 kDa	TRUE	unknown	10	10	9	8
112.1	TRUE	Empty	Ras-related protein Rab-11A OS=Homo sapiens OX=9606 GN=RAB11A PE=1 SV=1	H3BSC1_HUMAN (+1)		22 kDa	TRUE	unknown	9	9	8	7
112.2	TRUE	Empty	Ras-related protein Rab-11B OS=Homo sapiens OX=9606 GN=RAB11B PE=1 SV=4	sp|Q15907|RB11B_HUMAN		24 kDa	TRUE	unknown	8	8	9	8
112.3	TRUE	Empty	Ras-related protein Rab-11A (Fragment) OS=Homo sapiens OX=9606 GN=RAB11A PE=4 SV=1	H3BMH2_HUMAN		18 kDa	TRUE	unknown	0	0	0	0
113	TRUE	Empty	Cluster of Rho guanine nucleotide exchange factor 2 OS=Homo sapiens OX=9606 GN=ARHGEF2 PE=1 SV=1 (V9GYM8_HUMAN)	V9GYM8_HUMAN [5]		116 kDa	TRUE	unknown	9	7	15	13
113.1	TRUE	Empty	Rho guanine nucleotide exchange factor 2 OS=Homo sapiens OX=9606 GN=ARHGEF2 PE=1 SV=1	V9GYM8_HUMAN (+3)		116 kDa	TRUE	unknown	9	7	15	13
113.2	TRUE	Empty	Rho guanine nucleotide exchange factor 2 OS=Homo sapiens OX=9606 GN=ARHGEF2 PE=1 SV=2	Q5VY93_HUMAN		29 kDa	TRUE	unknown	0	0	2	0
114	TRUE	Empty	Cluster of Phosphoglycerate kinase 1 OS=Homo sapiens OX=9606 GN=PGK1 PE=1 SV=3 (sp|P00558|PGK1_HUMAN)	sp|P00558|PGK1_HUMAN [2]		45 kDa	TRUE	unknown	10	7	11	10
114.1	TRUE	Empty	Phosphoglycerate kinase 1 OS=Homo sapiens OX=9606 GN=PGK1 PE=1 SV=3	sp|P00558|PGK1_HUMAN		45 kDa	TRUE	unknown	10	7	11	10
114.2	TRUE	Empty	Phosphoglycerate kinase 2 OS=Homo sapiens OX=9606 GN=PGK2 PE=1 SV=3	PGK2_HUMAN		45 kDa	TRUE	unknown	3	0	0	0
115	TRUE	Empty	Cluster of Ras-related protein Rab-8A OS=Homo sapiens OX=9606 GN=RAB8A PE=1 SV=1 (sp|P61006|RAB8A_HUMAN)	sp|P61006|RAB8A_HUMAN [2]		24 kDa	TRUE	unknown	14	16	15	13
115.1	TRUE	Empty	Ras-related protein Rab-8A OS=Homo sapiens OX=9606 GN=RAB8A PE=1 SV=1	sp|P61006|RAB8A_HUMAN		24 kDa	TRUE	unknown	12	14	14	11
115.2	TRUE	Empty	Ras-related protein Rab-8B (Fragment) OS=Homo sapiens OX=9606 GN=RAB8B PE=1 SV=1	H0YNE9_HUMAN		22 kDa	TRUE	unknown	6	9	9	7
116	TRUE	Empty	Vesicle-associated membrane protein-associated protein A OS=Homo sapiens OX=9606 GN=VAPA PE=1 SV=3	sp|Q9P0L0|VAPA_HUMAN		28 kDa	TRUE	unknown	8	12	11	10
117	TRUE	Empty	Cluster of Hypoxia up-regulated protein 1 OS=Homo sapiens OX=9606 GN=HYOU1 PE=1 SV=1 (sp|Q9Y4L1|HYOU1_HUMAN)	sp|Q9Y4L1|HYOU1_HUMAN [2]		111 kDa	TRUE	unknown	11	11	10	9
117.1	TRUE	Empty	Hypoxia up-regulated protein 1 OS=Homo sapiens OX=9606 GN=HYOU1 PE=1 SV=1	sp|Q9Y4L1|HYOU1_HUMAN		111 kDa	TRUE	unknown	11	11	9	9
117.2	TRUE	Empty	Hypoxia up-regulated protein 1 (Fragment) OS=Homo sapiens OX=9606 GN=HYOU1 PE=1 SV=1	J3QL06_HUMAN		24 kDa	TRUE	unknown	0	4	4	4
118	TRUE	Empty	Cluster of Nodal modulator 1 OS=Homo sapiens OX=9606 GN=NOMO1 PE=1 SV=1 (A0A087X117_HUMAN)	A0A087X117_HUMAN [7]		139 kDa	TRUE	unknown	9	13	8	10
118.1	TRUE	Empty	Nodal modulator 1 OS=Homo sapiens OX=9606 GN=NOMO1 PE=1 SV=1	A0A087X117_HUMAN (+2)		139 kDa	TRUE	unknown	9	12	8	10
118.2	TRUE	Empty	Nodal modulator 3 OS=Homo sapiens OX=9606 GN=NOMO3 PE=1 SV=1	J3KN36_HUMAN (+3)		139 kDa	TRUE	unknown	8	12	7	9
119	TRUE	Empty	Cluster of Reticulon OS=Homo sapiens OX=9606 GN=RTN4 PE=1 SV=1 (F8W914_HUMAN)	F8W914_HUMAN [3]		37 kDa	TRUE	unknown	10	17	8	8
119.1	TRUE	Empty	Reticulon OS=Homo sapiens OX=9606 GN=RTN4 PE=1 SV=1	F8W914_HUMAN (+1)		37 kDa	TRUE	unknown	10	16	8	8
119.2	TRUE	Empty	Isoform 3 of Reticulon-4 OS=Homo sapiens OX=9606 GN=RTN4	sp|Q9NQC3-3|RTN4_HUMAN		22 kDa	TRUE	unknown	7	12	4	4
120	TRUE	Empty	Sperm-associated antigen 5 OS=Homo sapiens OX=9606 GN=SPAG5 PE=1 SV=2	SPAG5_HUMAN		134 kDa		unknown	8	10	12	10
121	TRUE	Empty	Signal recognition particle receptor subunit alpha OS=Homo sapiens OX=9606 GN=SRPRA PE=1 SV=2	sp|P08240|SRPRA_HUMAN		70 kDa		unknown	9	12	9	10
122	TRUE	Empty	Cluster of Isoform Gnas-2 of Guanine nucleotide-binding protein G(s) subunit alpha isoforms short OS=Homo sapiens OX=9606 GN=GNAS (sp|P63092-2|GNAS2_HUMAN)	sp|P63092-2|GNAS2_HUMAN [11]		44 kDa	TRUE	unknown	11	16	9	8
122.1	TRUE	Empty	Isoform Gnas-2 of Guanine nucleotide-binding protein G(s) subunit alpha isoforms short OS=Homo sapiens OX=9606 GN=GNAS	sp|P63092-2|GNAS2_HUMAN (+5)		44 kDa	TRUE	unknown	5	6	3	2
122.2	TRUE	Empty	Guanine nucleotide-binding protein G(k) subunit alpha OS=Homo sapiens OX=9606 GN=GNAI3 PE=1 SV=3	GNAI3_HUMAN		41 kDa	TRUE	unknown	4	8	5	5
122.3	TRUE	Empty	Guanine nucleotide-binding protein G(i) subunit alpha-2 OS=Homo sapiens OX=9606 GN=GNAI2 PE=1 SV=3	sp|P04899|GNAI2_HUMAN		40 kDa	TRUE	unknown	4	6	5	3
122.4	TRUE	Empty	Guanine nucleotide-binding protein G(i) subunit alpha-1 OS=Homo sapiens OX=9606 GN=GNAI1 PE=1 SV=2	sp|P63096|GNAI1_HUMAN		40 kDa	TRUE	unknown	0	4	4	4
122.5	TRUE	Empty	Isoform Alpha-2 of Guanine nucleotide-binding protein G(o) subunit alpha OS=Homo sapiens OX=9606 GN=GNAO1	sp|P09471-2|GNAO_HUMAN		40 kDa	TRUE	unknown	0	0	0	0
122.6	TRUE	Empty	Guanine nucleotide-binding protein G(s) subunit alpha isoforms short (Fragment) OS=Homo sapiens OX=9606 GN=GNAS PE=1 SV=1	H0Y7E8_HUMAN		11 kDa	TRUE	unknown	0	0	0	0
123	TRUE	Empty	Src substrate cortactin OS=Homo sapiens OX=9606 GN=CTTN PE=1 SV=2	sp|Q14247|SRC8_HUMAN		62 kDa		unknown	6	14	7	10
124	TRUE	Empty	Isoform 2 of Liprin-beta-1 OS=Homo sapiens OX=9606 GN=PPFIBP1	sp|Q86W92-2|LIPB1_HUMAN		113 kDa	TRUE	unknown	13	17	10	7
125	TRUE	Empty	Isoform 3 of Phosphatase and actin regulator 4 OS=Homo sapiens OX=9606 GN=PHACTR4	sp|Q8IZ21-3|PHAR4_HUMAN		76 kDa		unknown	12	14	7	8
126	TRUE	Empty	Filamin-A OS=Homo sapiens OX=9606 GN=FLNA PE=1 SV=1	Q5HY54_HUMAN (+3)		277 kDa		unknown	11	11	9	10
127	TRUE	Empty	Cluster of Ras-related protein Rab-14 OS=Homo sapiens OX=9606 GN=RAB14 PE=1 SV=4 (RAB14_HUMAN)	RAB14_HUMAN [2]		24 kDa	TRUE	unknown	11	14	15	11
127.1	TRUE	Empty	Ras-related protein Rab-14 OS=Homo sapiens OX=9606 GN=RAB14 PE=1 SV=4	RAB14_HUMAN		24 kDa	TRUE	unknown	11	14	15	11
127.2	TRUE	Empty	Ras-related protein Rab-14 (Fragment) OS=Homo sapiens OX=9606 GN=RAB14 PE=1 SV=1	X6RFL8_HUMAN		20 kDa	TRUE	unknown	0	0	0	0
128	TRUE	Empty	Cluster of Isoform 3 of Basigin OS=Homo sapiens OX=9606 GN=BSG (sp|P35613-3|BASI_HUMAN)	sp|P35613-3|BASI_HUMAN [3]		19 kDa	TRUE	unknown	12	12	9	11
128.1	TRUE	Empty	Isoform 3 of Basigin OS=Homo sapiens OX=9606 GN=BSG	sp|P35613-3|BASI_HUMAN		19 kDa	TRUE	unknown	12	12	8	10
128.2	TRUE	Empty	Isoform 2 of Basigin OS=Homo sapiens OX=9606 GN=BSG	sp|P35613-2|BASI_HUMAN (+1)		29 kDa	TRUE	unknown	10	10	7	9
129	TRUE	Empty	Polypeptide N-acetylgalactosaminyltransferase 2 OS=Homo sapiens OX=9606 GN=GALNT2 PE=1 SV=1	sp|Q10471|GALT2_HUMAN		65 kDa		unknown	10	12	11	9
130	TRUE	Empty	Isoform 2 of A-kinase anchor protein 13 OS=Homo sapiens OX=9606 GN=AKAP13	sp|Q12802-2|AKP13_HUMAN (+2)		308 kDa		unknown	16	21	2	1
131	TRUE	Empty	Fatty acid synthase OS=Homo sapiens OX=9606 GN=FASN PE=1 SV=1	A0A0U1RQF0_HUMAN (+1)		273 kDa		unknown	6	15	11	11
132	TRUE	Empty	Transitional endoplasmic reticulum ATPase OS=Homo sapiens OX=9606 GN=VCP PE=1 SV=4	TERA_HUMAN		89 kDa		unknown	13	11	11	9
133	TRUE	Empty	Isoform 2 of Dolichyl-diphosphooligosaccharide--protein glycosyltransferase subunit 2 OS=Homo sapiens OX=9606 GN=RPN2	sp|P04844-2|RPN2_HUMAN (+1)		68 kDa		unknown	9	14	8	9
134	TRUE	Empty	Coiled-coil domain-containing protein 47 OS=Homo sapiens OX=9606 GN=CCDC47 PE=1 SV=1	sp|Q96A33|CCD47_HUMAN		56 kDa		unknown	10	10	9	10
135	TRUE	Empty	Epiplakin OS=Homo sapiens OX=9606 GN=EPPK1 PE=1 SV=2	A0A075B730_HUMAN (+1)		553 kDa	TRUE	unknown	11	13	10	11
136	TRUE	Empty	Cytoskeleton-associated protein 4 OS=Homo sapiens OX=9606 GN=CKAP4 PE=1 SV=2	CKAP4_HUMAN		66 kDa		unknown	8	12	7	7
137	TRUE	Empty	Cluster of Fatty aldehyde dehydrogenase OS=Homo sapiens OX=9606 GN=ALDH3A2 PE=1 SV=1 (J3QRD1_HUMAN)	J3QRD1_HUMAN [6]		45 kDa	TRUE	unknown	10	11	11	10
137.1	TRUE	Empty	Fatty aldehyde dehydrogenase OS=Homo sapiens OX=9606 GN=ALDH3A2 PE=1 SV=1	J3QRD1_HUMAN (+2)		45 kDa	TRUE	unknown	10	11	11	10
137.2	TRUE	Empty	Aldehyde dehydrogenase family 3 member B2 (Fragment) OS=Homo sapiens OX=9606 GN=ALDH3B2 PE=3 SV=8	E9PJV0_HUMAN		16 kDa	TRUE	unknown	0	0	0	0
137.3	TRUE	Empty	Isoform 2 of Aldehyde dehydrogenase family 3 member B1 OS=Homo sapiens OX=9606 GN=ALDH3B1	sp|P43353-2|AL3B1_HUMAN (+1)		48 kDa	TRUE	unknown	0	0	0	0
138	TRUE	Empty	Glucosidase 2 subunit beta OS=Homo sapiens OX=9606 GN=PRKCSH PE=1 SV=1	K7ELL7_HUMAN (+2)		60 kDa		unknown	9	12	9	9
139	TRUE	Empty	60S ribosomal protein L4 OS=Homo sapiens OX=9606 GN=RPL4 PE=1 SV=5	RL4_HUMAN		48 kDa		unknown	6	10	10	7
140	TRUE	Empty	Enoyl-CoA delta isomerase 2, mitochondrial OS=Homo sapiens OX=9606 GN=ECI2 PE=1 SV=1	A0A0C4DGA2_HUMAN (+2)		40 kDa		unknown	3	9	11	10
141	TRUE	Empty	Zinc finger CCCH domain-containing protein 18 OS=Homo sapiens OX=9606 GN=ZC3H18 PE=1 SV=1	E7ERS3_HUMAN (+1)		109 kDa		unknown	0	0	18	18
142	TRUE	Empty	Serine/threonine-protein kinase mTOR OS=Homo sapiens OX=9606 GN=MTOR PE=1 SV=1	MTOR_HUMAN		289 kDa		unknown	15	18	2	1
143	TRUE	Empty	Isoform 3 of Exportin-2 OS=Homo sapiens OX=9606 GN=CSE1L	sp|P55060-3|XPO2_HUMAN (+1)		108 kDa		unknown	8	12	8	6
144	TRUE	Empty	Isoform 5 of Ubiquitin-associated protein 2-like OS=Homo sapiens OX=9606 GN=UBAP2L	sp|Q14157-5|UBP2L_HUMAN (+1)		117 kDa		unknown	11	9	6	11
145	TRUE	Empty	Probable ATP-dependent RNA helicase DDX46 OS=Homo sapiens OX=9606 GN=DDX46 PE=1 SV=1	A0A0C4DG89_HUMAN (+1)		117 kDa		unknown	1	0	19	13
146	TRUE	Empty	Eukaryotic translation initiation factor 4 gamma 2 (Fragment) OS=Homo sapiens OX=9606 GN=EIF4G2 PE=1 SV=1	D3DQV9_HUMAN (+3)		102 kDa		unknown	7	5	10	4
147	TRUE	Empty	Vesicle-associated membrane protein-associated protein B/C OS=Homo sapiens OX=9606 GN=VAPB PE=1 SV=3	sp|O95292|VAPB_HUMAN		27 kDa	TRUE	unknown	9	12	10	9
148	TRUE	Empty	Alpha-enolase OS=Homo sapiens OX=9606 GN=ENO1 PE=1 SV=2	sp|P06733|ENOA_HUMAN		47 kDa	TRUE	unknown	9	7	15	12
149	TRUE	Empty	Cluster of ARF GTPase-activating protein GIT2 OS=Homo sapiens OX=9606 GN=GIT2 PE=1 SV=2 (sp|Q14161|GIT2_HUMAN)	sp|Q14161|GIT2_HUMAN [2]		85 kDa	TRUE	unknown	0	0	17	19
149.1	TRUE	Empty	ARF GTPase-activating protein GIT2 OS=Homo sapiens OX=9606 GN=GIT2 PE=1 SV=2	sp|Q14161|GIT2_HUMAN		85 kDa	TRUE	unknown	0	0	17	19
149.2	TRUE	Empty	ARF GTPase-activating protein GIT2 (Fragment) OS=Homo sapiens OX=9606 GN=GIT2 PE=1 SV=1	R4GNG3_HUMAN		72 kDa	TRUE	unknown	0	0	13	15
150	TRUE	Empty	Cytosolic phospholipase A2 OS=Homo sapiens OX=9606 GN=PLA2G4A PE=1 SV=2	PA24A_HUMAN		85 kDa		unknown	7	7	8	8
151	TRUE	Empty	Signal recognition particle receptor subunit beta OS=Homo sapiens OX=9606 GN=SRPRB PE=1 SV=3	SRPRB_HUMAN		30 kDa		unknown	10	9	9	9
152	TRUE	Empty	Leucine-rich repeat-containing protein 59 OS=Homo sapiens OX=9606 GN=LRRC59 PE=1 SV=1	LRC59_HUMAN		35 kDa		unknown	9	9	11	9
153	TRUE	Empty	Cluster of Poly(rC)-binding protein 1 OS=Homo sapiens OX=9606 GN=PCBP1 PE=1 SV=2 (PCBP1_HUMAN)	PCBP1_HUMAN [11]		37 kDa	TRUE	unknown	7	8	13	10
153.1	TRUE	Empty	Poly(rC)-binding protein 1 OS=Homo sapiens OX=9606 GN=PCBP1 PE=1 SV=2	PCBP1_HUMAN		37 kDa	TRUE	unknown	6	6	10	8
153.2	TRUE	Empty	Poly(rC)-binding protein 2 OS=Homo sapiens OX=9606 GN=PCBP2 PE=1 SV=1	F8VZX2_HUMAN (+9)		34 kDa	TRUE	unknown	3	4	7	5
154	TRUE	Empty	Splicing factor 3B subunit 1 OS=Homo sapiens OX=9606 GN=SF3B1 PE=1 SV=3	sp|O75533|SF3B1_HUMAN		146 kDa		unknown	3	3	15	12
155	TRUE	Empty	Cluster of 40S ribosomal protein S3 OS=Homo sapiens OX=9606 GN=RPS3 PE=1 SV=2 (sp|P23396|RS3_HUMAN)	sp|P23396|RS3_HUMAN [2]		27 kDa	TRUE	unknown	8	11	10	8
155.1	TRUE	Empty	40S ribosomal protein S3 OS=Homo sapiens OX=9606 GN=RPS3 PE=1 SV=2	sp|P23396|RS3_HUMAN		27 kDa	TRUE	unknown	8	11	10	8
155.2	TRUE	Empty	40S ribosomal protein S3 (Fragment) OS=Homo sapiens OX=9606 GN=RPS3 PE=1 SV=1	E9PK82_HUMAN		14 kDa	TRUE	unknown	0	0	0	0
156	TRUE	Empty	ATP synthase subunit alpha, mitochondrial OS=Homo sapiens OX=9606 GN=ATP5F1A PE=1 SV=1	sp|P25705|ATPA_HUMAN		60 kDa		unknown	4	9	10	9
157	TRUE	Empty	Cluster of Squalene synthase OS=Homo sapiens OX=9606 GN=FDFT1 PE=1 SV=1 (sp|P37268|FDFT_HUMAN)	sp|P37268|FDFT_HUMAN [2]		48 kDa	TRUE	unknown	4	8	8	10
157.1	TRUE	Empty	Squalene synthase OS=Homo sapiens OX=9606 GN=FDFT1 PE=1 SV=1	sp|P37268|FDFT_HUMAN		48 kDa	TRUE	unknown	4	8	8	10
157.2	TRUE	Empty	Squalene synthase OS=Homo sapiens OX=9606 GN=FDFT1 PE=1 SV=1	E9PQ90_HUMAN		5 kDa	TRUE	unknown	0	0	0	0
158	TRUE	Empty	Myotubularin-related protein 13 OS=Homo sapiens OX=9606 GN=SBF2 PE=1 SV=1	sp|Q86WG5|MTMRD_HUMAN		208 kDa	TRUE	unknown	13	23	0	0
159	TRUE	Empty	Cluster of Protein scribble homolog OS=Homo sapiens OX=9606 GN=SCRIB PE=1 SV=1 (A0A0G2JNZ2_HUMAN)	A0A0G2JNZ2_HUMAN [6]		175 kDa	TRUE	unknown	0	0	17	17
159.1	TRUE	Empty	Protein scribble homolog OS=Homo sapiens OX=9606 GN=SCRIB PE=1 SV=1	A0A0G2JNZ2_HUMAN (+3)		175 kDa	TRUE	unknown	0	0	17	17
159.2	TRUE	Empty	Protein scribble homolog OS=Homo sapiens OX=9606 GN=SCRIB PE=1 SV=1	A0A0G2JMS7_HUMAN (+1)		165 kDa	TRUE	unknown	0	0	0	0
160	TRUE	Empty	Cluster of Non-specific serine/threonine protein kinase OS=Homo sapiens OX=9606 GN=PAK1 PE=1 SV=1 (B3KNX7_HUMAN)	B3KNX7_HUMAN [9]		58 kDa	TRUE	unknown	0	0	12	15
160.1	TRUE	Empty	Non-specific serine/threonine protein kinase OS=Homo sapiens OX=9606 GN=PAK1 PE=1 SV=1	B3KNX7_HUMAN (+3)		58 kDa	TRUE	unknown	0	0	12	15
160.2	TRUE	Empty	Non-specific serine/threonine protein kinase OS=Homo sapiens OX=9606 GN=PAK3 PE=1 SV=1	A0A087X294_HUMAN (+4)		61 kDa	TRUE	unknown	0	0	0	0
161	TRUE	Empty	Long-chain-fatty-acid--CoA ligase 3 OS=Homo sapiens OX=9606 GN=ACSL3 PE=1 SV=3	ACSL3_HUMAN		80 kDa	TRUE	unknown	7	14	4	7
162	TRUE	Empty	Cleavage and polyadenylation-specificity factor subunit 6 OS=Homo sapiens OX=9606 GN=CPSF6 PE=1 SV=1	F8WJN3_HUMAN (+1)		52 kDa		unknown	6	5	11	8
163	TRUE	Empty	eIF-2-alpha kinase activator GCN1 OS=Homo sapiens OX=9606 GN=GCN1 PE=1 SV=6	GCN1_HUMAN		293 kDa		unknown	9	9	5	8
164	TRUE	Empty	Oxysterol-binding protein 1 OS=Homo sapiens OX=9606 GN=OSBP PE=1 SV=1	OSBP1_HUMAN		89 kDa	TRUE	unknown	8	12	5	6
165	TRUE	Empty	Peroxiredoxin-4 OS=Homo sapiens OX=9606 GN=PRDX4 PE=1 SV=1	PRDX4_HUMAN		31 kDa	TRUE	unknown	8	14	10	10
166	TRUE	Empty	Isoform B of AP-2 complex subunit alpha-1 OS=Homo sapiens OX=9606 GN=AP2A1	sp|O95782-2|AP2A1_HUMAN (+1)		105 kDa	TRUE	unknown	7	13	10	7
167	TRUE	Empty	Cluster of Isoform 2 of Guanine nucleotide-binding protein G(I)/G(S)/G(T) subunit beta-1 OS=Homo sapiens OX=9606 GN=GNB1 (sp|P62873-2|GBB1_HUMAN)	sp|P62873-2|GBB1_HUMAN [5]		36 kDa	TRUE	unknown	8	11	6	9
167.1	TRUE	Empty	Isoform 2 of Guanine nucleotide-binding protein G(I)/G(S)/G(T) subunit beta-1 OS=Homo sapiens OX=9606 GN=GNB1	sp|P62873-2|GBB1_HUMAN (+1)		36 kDa	TRUE	unknown	5	6	2	4
167.2	TRUE	Empty	Guanine nucleotide-binding protein G(I)/G(S)/G(T) subunit beta-2 OS=Homo sapiens OX=9606 GN=GNB2 PE=1 SV=3	sp|P62879|GBB2_HUMAN		37 kDa	TRUE	unknown	4	5	3	4
167.3	TRUE	Empty	Guanine nucleotide-binding protein subunit beta-4 OS=Homo sapiens OX=9606 GN=GNB4 PE=1 SV=3	GBB4_HUMAN		38 kDa	TRUE	unknown	3	4	2	3
167.4	TRUE	Empty	Guanine nucleotide-binding protein G(I)/G(S)/G(T) subunit beta-3 (Fragment) OS=Homo sapiens OX=9606 GN=GNB3 PE=1 SV=1	F5H8J8_HUMAN		25 kDa	TRUE	unknown	0	2	0	1
168	TRUE	Empty	Isoform 2 of Clathrin interactor 1 OS=Homo sapiens OX=9606 GN=CLINT1	sp|Q14677-2|EPN4_HUMAN (+1)		68 kDa		unknown	9	14	8	6
169	TRUE	Empty	Cluster of Synaptic vesicle membrane protein VAT-1 homolog OS=Homo sapiens OX=9606 GN=VAT1 PE=1 SV=2 (sp|Q99536|VAT1_HUMAN)	sp|Q99536|VAT1_HUMAN [2]		42 kDa	TRUE	unknown	14	15	4	4
169.1	TRUE	Empty	Synaptic vesicle membrane protein VAT-1 homolog OS=Homo sapiens OX=9606 GN=VAT1 PE=1 SV=2	sp|Q99536|VAT1_HUMAN		42 kDa	TRUE	unknown	14	15	4	4
169.2	TRUE	Empty	Synaptic vesicle membrane protein VAT-1 homolog (Fragment) OS=Homo sapiens OX=9606 GN=VAT1 PE=1 SV=1	K7EJM4_HUMAN		3 kDa	TRUE	unknown	0	0	0	0
170	TRUE	Empty	Protein LYRIC OS=Homo sapiens OX=9606 GN=MTDH PE=1 SV=2	LYRIC_HUMAN		64 kDa		unknown	10	8	8	8
171	TRUE	Empty	Protein kinase C and casein kinase substrate in neurons protein 3 OS=Homo sapiens OX=9606 GN=PACSIN3 PE=1 SV=2	PACN3_HUMAN		48 kDa		unknown	12	11	7	4
172	TRUE	Empty	60S ribosomal protein L7 OS=Homo sapiens OX=9606 GN=RPL7 PE=1 SV=1	RL7_HUMAN		29 kDa		unknown	3	8	11	8
173	TRUE	Empty	Cluster of 40S ribosomal protein S4, X isoform OS=Homo sapiens OX=9606 GN=RPS4X PE=1 SV=2 (RS4X_HUMAN)	RS4X_HUMAN [3]		30 kDa	TRUE	unknown	5	8	5	8
173.1	TRUE	Empty	40S ribosomal protein S4, X isoform OS=Homo sapiens OX=9606 GN=RPS4X PE=1 SV=2	RS4X_HUMAN		30 kDa	TRUE	unknown	5	8	5	8
173.2	TRUE	Empty	40S ribosomal protein S4, Y isoform 1 (Fragment) OS=Homo sapiens OX=9606 GN=RPS4Y1 PE=1 SV=1	C9JEH7_HUMAN (+1)		29 kDa	TRUE	unknown	3	6	4	7
174	TRUE	Empty	Cluster of Isoform B of Ras-related C3 botulinum toxin substrate 1 OS=Homo sapiens OX=9606 GN=RAC1 (sp|P63000-2|RAC1_HUMAN)	sp|P63000-2|RAC1_HUMAN [5]		23 kDa	TRUE	unknown	6	9	10	10
174.1	TRUE	Empty	Isoform B of Ras-related C3 botulinum toxin substrate 1 OS=Homo sapiens OX=9606 GN=RAC1	sp|P63000-2|RAC1_HUMAN (+1)		23 kDa	TRUE	unknown	5	7	8	8
174.2	TRUE	Empty	Ras-related C3 botulinum toxin substrate 3 (Fragment) OS=Homo sapiens OX=9606 GN=RAC3 PE=1 SV=1	J3KSC4_HUMAN (+1)		15 kDa	TRUE	unknown	2	3	4	4
174.3	TRUE	Empty	Ras-related C3 botulinum toxin substrate 2 OS=Homo sapiens OX=9606 GN=RAC2 PE=1 SV=1	RAC2_HUMAN		21 kDa	TRUE	unknown	0	0	3	3
175	TRUE	Empty	Cluster of Isoform 2 of Cytoskeleton-associated protein 5 OS=Homo sapiens OX=9606 GN=CKAP5 (sp|Q14008-2|CKAP5_HUMAN)	sp|Q14008-2|CKAP5_HUMAN [4]		219 kDa	TRUE	unknown	8	8	10	7
175.1	TRUE	Empty	Isoform 2 of Cytoskeleton-associated protein 5 OS=Homo sapiens OX=9606 GN=CKAP5	sp|Q14008-2|CKAP5_HUMAN (+2)		219 kDa	TRUE	unknown	8	8	10	7
175.2	TRUE	Empty	Cytoskeleton-associated protein 5 (Fragment) OS=Homo sapiens OX=9606 GN=CKAP5 PE=1 SV=2	H0YEK7_HUMAN		22 kDa	TRUE	unknown	0	0	0	0
176	TRUE	Empty	Isoform 3 of Rapamycin-insensitive companion of mTOR OS=Homo sapiens OX=9606 GN=RICTOR	sp|Q6R327-3|RICTR_HUMAN (+1)		195 kDa		unknown	15	16	1	2
177	TRUE	Empty	Cluster of Myosin phosphatase Rho-interacting protein (Fragment) OS=Homo sapiens OX=9606 GN=MPRIP PE=1 SV=1 (J3KSW8_HUMAN)	J3KSW8_HUMAN [5]		96 kDa	TRUE	unknown	14	16	0	1
177.1	TRUE	Empty	Myosin phosphatase Rho-interacting protein (Fragment) OS=Homo sapiens OX=9606 GN=MPRIP PE=1 SV=1	J3KSW8_HUMAN (+2)		96 kDa	TRUE	unknown	14	16	0	1
177.2	TRUE	Empty	Myosin phosphatase Rho-interacting protein (Fragment) OS=Homo sapiens OX=9606 GN=MPRIP PE=1 SV=3	H0Y2S9_HUMAN		203 kDa	TRUE	unknown	0	11	0	0
177.3	TRUE	Empty	Myosin phosphatase Rho-interacting protein (Fragment) OS=Homo sapiens OX=9606 GN=MPRIP PE=1 SV=3	H0Y7E2_HUMAN		123 kDa	TRUE	unknown	0	0	0	0
178	TRUE	Empty	Dolichyl-diphosphooligosaccharide--protein glycosyltransferase 48 kDa subunit OS=Homo sapiens OX=9606 GN=DDOST PE=1 SV=1	A0A0C4DGS1_HUMAN (+1)		49 kDa		unknown	4	8	8	7
179	TRUE	Empty	Cluster of Tyrosine-protein kinase OS=Homo sapiens OX=9606 GN=YES1 PE=1 SV=1 (J3QRU1_HUMAN)	J3QRU1_HUMAN [11]		61 kDa	TRUE	unknown	5	10	8	9
179.1	TRUE	Empty	Tyrosine-protein kinase OS=Homo sapiens OX=9606 GN=YES1 PE=1 SV=1	J3QRU1_HUMAN (+1)		61 kDa	TRUE	unknown	5	10	8	8
179.2	TRUE	Empty	Isoform 2 of Tyrosine-protein kinase Lyn OS=Homo sapiens OX=9606 GN=LYN	sp|P07948-2|LYN_HUMAN (+1)		56 kDa	TRUE	unknown	0	0	0	2
179.3	TRUE	Empty	Isoform 2 of Serine/threonine-protein kinase ICK OS=Homo sapiens OX=9606 GN=ICK	sp|Q9UPZ9-2|ICK_HUMAN (+1)		34 kDa	TRUE	unknown	0	0	0	0
179.4	TRUE	Empty	Fibroblast growth factor receptor OS=Homo sapiens OX=9606 GN=FGFR3 PE=1 SV=1	F8W9L4_HUMAN (+4)		85 kDa	TRUE	unknown	0	0	0	0
180	TRUE	Empty	L-lactate dehydrogenase B chain OS=Homo sapiens OX=9606 GN=LDHB PE=1 SV=2	LDHB_HUMAN		37 kDa	TRUE	unknown	7	7	10	8
181	TRUE	Empty	Cluster of 60S ribosomal protein L3 OS=Homo sapiens OX=9606 GN=RPL3 PE=1 SV=2 (RL3_HUMAN)	RL3_HUMAN [2]		46 kDa	TRUE	unknown	3	7	8	5
181.1	TRUE	Empty	60S ribosomal protein L3 OS=Homo sapiens OX=9606 GN=RPL3 PE=1 SV=2	RL3_HUMAN		46 kDa	TRUE	unknown	3	7	8	5
181.2	TRUE	Empty	60S ribosomal protein L3 (Fragment) OS=Homo sapiens OX=9606 GN=RPL3 PE=1 SV=1	H7C422_HUMAN		35 kDa	TRUE	unknown	2	5	4	0
182	TRUE	Empty	Syntaxin-17 OS=Homo sapiens OX=9606 GN=STX17 PE=1 SV=2	STX17_HUMAN		33 kDa		unknown	8	5	10	9
183	TRUE	Empty	Isoform 3 of Calumenin OS=Homo sapiens OX=9606 GN=CALU	sp|O43852-3|CALU_HUMAN (+1)		38 kDa		unknown	10	10	8	8
184	TRUE	Empty	Dolichyl-diphosphooligosaccharide--protein glycosyltransferase subunit STT3A OS=Homo sapiens OX=9606 GN=STT3A PE=1 SV=2	sp|P46977|STT3A_HUMAN		81 kDa		unknown	5	6	7	5
185	TRUE	Empty	Cluster of Heterogeneous nuclear ribonucleoprotein U OS=Homo sapiens OX=9606 GN=HNRNPU PE=1 SV=6 (sp|Q00839|HNRPU_HUMAN)	sp|Q00839|HNRPU_HUMAN [2]		91 kDa	TRUE	unknown	5	7	9	10
185.1	TRUE	Empty	Heterogeneous nuclear ribonucleoprotein U OS=Homo sapiens OX=9606 GN=HNRNPU PE=1 SV=6	sp|Q00839|HNRPU_HUMAN		91 kDa	TRUE	unknown	5	7	9	10
185.2	TRUE	Empty	Heterogeneous nuclear ribonucleoprotein U (Fragment) OS=Homo sapiens OX=9606 GN=HNRNPU PE=1 SV=1	A0A1W2PQD4_HUMAN		36 kDa	TRUE	unknown	0	0	0	0
186	TRUE	Empty	Zinc finger CCCH-type antiviral protein 1 OS=Homo sapiens OX=9606 GN=ZC3HAV1 PE=1 SV=3	sp|Q7Z2W4|ZCCHV_HUMAN		101 kDa		unknown	2	7	14	12
187	TRUE	Empty	Isoform 2 of Golgi membrane protein 1 OS=Homo sapiens OX=9606 GN=GOLM1	sp|Q8NBJ4-2|GOLM1_HUMAN (+1)		44 kDa		unknown	7	7	5	6
188	TRUE	Empty	Cluster of Isoform 3 of Atlastin-2 OS=Homo sapiens OX=9606 GN=ATL2 (sp|Q8NHH9-3|ATLA2_HUMAN)	sp|Q8NHH9-3|ATLA2_HUMAN [2]		47 kDa	TRUE	unknown	8	11	8	8
188.1	TRUE	Empty	Isoform 3 of Atlastin-2 OS=Homo sapiens OX=9606 GN=ATL2	sp|Q8NHH9-3|ATLA2_HUMAN		47 kDa	TRUE	unknown	8	10	8	8
188.2	TRUE	Empty	Atlastin-2 OS=Homo sapiens OX=9606 GN=ATL2 PE=1 SV=2	sp|Q8NHH9|ATLA2_HUMAN		66 kDa	TRUE	unknown	8	11	7	7
189	TRUE	Empty	Coatomer subunit beta OS=Homo sapiens OX=9606 GN=COPB1 PE=1 SV=3	COPB_HUMAN		107 kDa		unknown	9	9	7	6
190	TRUE	Empty	Insulin-like growth factor 2 mRNA-binding protein 3 OS=Homo sapiens OX=9606 GN=IGF2BP3 PE=1 SV=2	sp|O00425|IF2B3_HUMAN		64 kDa	TRUE	unknown	3	5	11	16
191	TRUE	Empty	Flotillin-1 OS=Homo sapiens OX=9606 GN=FLOT1 PE=1 SV=3	sp|O75955|FLOT1_HUMAN		47 kDa		unknown	7	7	4	5
192	TRUE	Empty	Isoform 2 of Long-chain-fatty-acid--CoA ligase 1 OS=Homo sapiens OX=9606 GN=ACSL1	sp|P33121-2|ACSL1_HUMAN (+1)		77 kDa		unknown	7	9	5	5
193	TRUE	Empty	Isoform 2 of B-cell receptor-associated protein 31 OS=Homo sapiens OX=9606 GN=BCAP31	sp|P51572-2|BAP31_HUMAN (+1)		35 kDa		unknown	9	11	7	8
194	TRUE	Empty	Peroxisomal bifunctional enzyme OS=Homo sapiens OX=9606 GN=EHHADH PE=1 SV=3	sp|Q08426|ECHP_HUMAN		79 kDa		unknown	8	10	5	8
195	TRUE	Empty	Isoform 2 of Nicalin OS=Homo sapiens OX=9606 GN=NCLN	sp|Q969V3-2|NCLN_HUMAN (+1)		63 kDa		unknown	8	11	5	6
196	TRUE	Empty	Isoform 2 of Uncharacterized protein KIAA1522 OS=Homo sapiens OX=9606 GN=KIAA1522	sp|Q9P206-2|K1522_HUMAN		113 kDa		unknown	7	12	6	5
197	TRUE	Empty	Cluster of Isoform J of Protein SON OS=Homo sapiens OX=9606 GN=SON (sp|P18583-10|SON_HUMAN)	sp|P18583-10|SON_HUMAN [4]		248 kDa	TRUE	unknown	1	0	17	11
197.1	TRUE	Empty	Isoform J of Protein SON OS=Homo sapiens OX=9606 GN=SON	sp|P18583-10|SON_HUMAN (+2)		248 kDa	TRUE	unknown	1	0	17	11
197.2	TRUE	Empty	Protein SON (Fragment) OS=Homo sapiens OX=9606 GN=SON PE=1 SV=1	H7C1M2_HUMAN		160 kDa	TRUE	unknown	0	0	0	0
198	TRUE	Empty	Cluster of ADP/ATP translocase 2 OS=Homo sapiens OX=9606 GN=SLC25A5 PE=1 SV=7 (ADT2_HUMAN)	ADT2_HUMAN [2]		33 kDa	TRUE	unknown	7	7	9	9
198.1	TRUE	Empty	ADP/ATP translocase 2 OS=Homo sapiens OX=9606 GN=SLC25A5 PE=1 SV=7	ADT2_HUMAN		33 kDa	TRUE	unknown	6	6	8	8
198.2	TRUE	Empty	ADP/ATP translocase 3 OS=Homo sapiens OX=9606 GN=SLC25A6 PE=1 SV=4	ADT3_HUMAN		33 kDa	TRUE	unknown	6	6	7	8
199	TRUE	Empty	Cluster of 60S acidic ribosomal protein P2 OS=Homo sapiens OX=9606 GN=RPLP2 PE=1 SV=1 (RLA2_HUMAN)	RLA2_HUMAN [2]		12 kDa	TRUE	unknown	9	8	10	7
199.1	TRUE	Empty	60S acidic ribosomal protein P2 OS=Homo sapiens OX=9606 GN=RPLP2 PE=1 SV=1	RLA2_HUMAN		12 kDa	TRUE	unknown	9	8	10	7
199.2	TRUE	Empty	60S acidic ribosomal protein P2 (Fragment) OS=Homo sapiens OX=9606 GN=RPLP2 PE=1 SV=1	H0YDD8_HUMAN		9 kDa	TRUE	unknown	4	0	4	0
200	TRUE	Empty	Transmembrane protein 263 OS=Homo sapiens OX=9606 GN=TMEM263 PE=1 SV=1	TM263_HUMAN		12 kDa		unknown	7	6	10	10
201	TRUE	Empty	Tumor protein D54 OS=Homo sapiens OX=9606 GN=TPD52L2 PE=1 SV=2	sp|O43399|TPD54_HUMAN		22 kDa		unknown	8	11	6	6
202	TRUE	Empty	Isoform CNPI of 2',3'-cyclic-nucleotide 3'-phosphodiesterase OS=Homo sapiens OX=9606 GN=CNP	sp|P09543-2|CN37_HUMAN (+1)		45 kDa		unknown	6	10	6	5
203	TRUE	Empty	ATP-binding cassette sub-family D member 3 OS=Homo sapiens OX=9606 GN=ABCD3 PE=1 SV=1	sp|P28288|ABCD3_HUMAN		75 kDa		unknown	8	5	6	8
204	TRUE	Empty	Isoform 2 of Ataxin-2-like protein OS=Homo sapiens OX=9606 GN=ATXN2L	sp|Q8WWM7-2|ATX2L_HUMAN (+7)		112 kDa		unknown	3	3	9	10
205	TRUE	Empty	Cluster of 40S ribosomal protein S3a OS=Homo sapiens OX=9606 GN=RPS3A PE=1 SV=2 (RS3A_HUMAN)	RS3A_HUMAN [2]		30 kDa	TRUE	unknown	2	8	8	8
205.1	TRUE	Empty	40S ribosomal protein S3a OS=Homo sapiens OX=9606 GN=RPS3A PE=1 SV=2	RS3A_HUMAN		30 kDa	TRUE	unknown	2	8	8	8
205.2	TRUE	Empty	40S ribosomal protein S3a OS=Homo sapiens OX=9606 GN=RPS3A PE=1 SV=1	D6R9B6_HUMAN		17 kDa	TRUE	unknown	0	6	0	0
206	TRUE	Empty	Lanosterol 14-alpha demethylase OS=Homo sapiens OX=9606 GN=CYP51A1 PE=1 SV=1	A0A0C4DFL7_HUMAN (+1)		57 kDa		unknown	5	7	7	4
207	TRUE	Empty	Cluster of Coatomer subunit gamma-1 OS=Homo sapiens OX=9606 GN=COPG1 PE=1 SV=1 (COPG1_HUMAN)	COPG1_HUMAN [3]		98 kDa	TRUE	unknown	4	8	6	9
207.1	TRUE	Empty	Coatomer subunit gamma-1 OS=Homo sapiens OX=9606 GN=COPG1 PE=1 SV=1	COPG1_HUMAN		98 kDa	TRUE	unknown	4	8	6	9
207.2	TRUE	Empty	Isoform 2 of Coatomer subunit gamma-2 OS=Homo sapiens OX=9606 GN=COPG2	sp|Q9UBF2-2|COPG2_HUMAN (+1)		81 kDa	TRUE	unknown	0	0	0	0
208	TRUE	Empty	Nuclear pore complex protein Nup155 OS=Homo sapiens OX=9606 GN=NUP155 PE=1 SV=1	E9PF10_HUMAN (+2)		148 kDa		unknown	6	9	7	6
209	TRUE	Empty	tRNA pseudouridine synthase (Fragment) OS=Homo sapiens OX=9606 GN=PUS1 PE=1 SV=1	G8JLB3_HUMAN (+2)		43 kDa		unknown	8	8	9	7
210	TRUE	Empty	60S ribosomal protein L5 OS=Homo sapiens OX=9606 GN=RPL5 PE=1 SV=3	RL5_HUMAN		34 kDa		unknown	7	7	7	8
211	TRUE	Empty	Translocation protein SEC63 homolog OS=Homo sapiens OX=9606 GN=SEC63 PE=1 SV=2	SEC63_HUMAN		88 kDa		unknown	6	11	7	6
212	TRUE	Empty	Spartin OS=Homo sapiens OX=9606 GN=SPART PE=1 SV=1	SPART_HUMAN		73 kDa		unknown	6	10	8	7
213	TRUE	Empty	BAG family molecular chaperone regulator 2 OS=Homo sapiens OX=9606 GN=BAG2 PE=1 SV=1	sp|O95816|BAG2_HUMAN		24 kDa		unknown	8	7	5	7
214	TRUE	Empty	Atlastin-3 OS=Homo sapiens OX=9606 GN=ATL3 PE=1 SV=1	ATLA3_HUMAN		61 kDa		unknown	7	8	7	4
215	TRUE	Empty	Liprin-beta-2 OS=Homo sapiens OX=9606 GN=PPFIBP2 PE=1 SV=1	E9PP16_HUMAN (+3)		81 kDa	TRUE	unknown	10	11	7	4
216	TRUE	Empty	Elongation factor Tu, mitochondrial OS=Homo sapiens OX=9606 GN=TUFM PE=1 SV=2	EFTU_HUMAN		50 kDa		unknown	6	9	5	6
217	TRUE	Empty	Cluster of Receptor of activated protein C kinase 1 OS=Homo sapiens OX=9606 GN=RACK1 PE=1 SV=3 (RACK1_HUMAN)	RACK1_HUMAN [3]		35 kDa	TRUE	unknown	5	5	6	8
217.1	TRUE	Empty	Receptor of activated protein C kinase 1 OS=Homo sapiens OX=9606 GN=RACK1 PE=1 SV=3	RACK1_HUMAN		35 kDa	TRUE	unknown	4	5	6	7
217.2	TRUE	Empty	Receptor of-activated protein C kinase 1 OS=Homo sapiens OX=9606 GN=RACK1 PE=1 SV=1	D6RF23_HUMAN		11 kDa	TRUE	unknown	3	0	0	2
217.3	TRUE	Empty	Receptor of-activated protein C kinase 1 (Fragment) OS=Homo sapiens OX=9606 GN=RACK1 PE=1 SV=1	H0Y9P0_HUMAN		9 kDa	TRUE	unknown	0	0	0	0
218	TRUE	Empty	Coatomer subunit alpha OS=Homo sapiens OX=9606 GN=COPA PE=1 SV=2	sp|P53621|COPA_HUMAN		138 kDa		unknown	3	9	7	7
219	TRUE	Empty	Isoform 2 of STE20-like serine/threonine-protein kinase OS=Homo sapiens OX=9606 GN=SLK	sp|Q9H2G2-2|SLK_HUMAN		139 kDa		unknown	12	16	1	0
220	TRUE	Empty	Isoform 2 of Ankycorbin OS=Homo sapiens OX=9606 GN=RAI14	sp|Q9P0K7-2|RAI14_HUMAN (+2)		110 kDa		unknown	13	13	0	1
221	TRUE	Empty	C-1-tetrahydrofolate synthase, cytoplasmic OS=Homo sapiens OX=9606 GN=MTHFD1 PE=1 SV=1	F5H2F4_HUMAN		111 kDa		unknown	3	7	10	5
222	TRUE	Empty	Cluster of 60S ribosomal protein L10 OS=Homo sapiens OX=9606 GN=RPL10 PE=1 SV=2 (F8W7C6_HUMAN)	F8W7C6_HUMAN [3]		19 kDa	TRUE	unknown	7	7	7	7
222.1	TRUE	Empty	60S ribosomal protein L10 OS=Homo sapiens OX=9606 GN=RPL10 PE=1 SV=2	F8W7C6_HUMAN		19 kDa	TRUE	unknown	7	7	7	6
222.2	TRUE	Empty	60S ribosomal protein L10 OS=Homo sapiens OX=9606 GN=RPL10 PE=1 SV=4	RL10_HUMAN (+1)		25 kDa	TRUE	unknown	5	6	6	6
223	TRUE	Empty	Serine/arginine-rich-splicing factor 1 OS=Homo sapiens OX=9606 GN=SRSF1 PE=1 SV=1	J3KTL2_HUMAN (+1)		28 kDa		unknown	0	0	14	14
224	TRUE	Empty	Rho-related GTP-binding protein RhoG OS=Homo sapiens OX=9606 GN=RHOG PE=1 SV=1	RHOG_HUMAN		21 kDa	TRUE	unknown	9	7	8	7
225	TRUE	Empty	60S ribosomal protein L26 OS=Homo sapiens OX=9606 GN=RPL26 PE=1 SV=1	RL26_HUMAN		17 kDa		unknown	6	8	8	6
226	TRUE	Empty	Histone deacetylase complex subunit SAP18 OS=Homo sapiens OX=9606 GN=SAP18 PE=1 SV=1	SAP18_HUMAN (+1)		18 kDa		unknown	1	1	8	11
227	TRUE	Empty	Isoform 3 of L-lactate dehydrogenase A chain OS=Homo sapiens OX=9606 GN=LDHA	sp|P00338-3|LDHA_HUMAN (+1)		40 kDa	TRUE	unknown	6	5	10	9
228	TRUE	Empty	Isoform 2 of ATP-citrate synthase OS=Homo sapiens OX=9606 GN=ACLY	sp|P53396-2|ACLY_HUMAN (+1)		120 kDa		unknown	2	8	10	4
229	TRUE	Empty	Isoform 2 of Heterogeneous nuclear ribonucleoprotein K OS=Homo sapiens OX=9606 GN=HNRNPK	sp|P61978-2|HNRPK_HUMAN (+2)		51 kDa		unknown	5	7	10	9
230	TRUE	Empty	Isoform 2 of Serine/threonine-protein kinase N2 OS=Homo sapiens OX=9606 GN=PKN2	sp|Q16513-2|PKN2_HUMAN		110 kDa		unknown	8	8	2	7
231	TRUE	Empty	Nucleobindin 2, isoform CRA_b OS=Homo sapiens OX=9606 GN=NUCB2 PE=1 SV=1	A0A087WSV8_HUMAN (+2)		50 kDa		unknown	7	9	5	6
232	TRUE	Empty	Cluster of Protein transport protein Sec61 subunit alpha isoform 1 OS=Homo sapiens OX=9606 GN=SEC61A1 PE=1 SV=1 (B4DR61_HUMAN)	B4DR61_HUMAN [5]		53 kDa	TRUE	unknown	5	5	6	5
232.1	TRUE	Empty	Protein transport protein Sec61 subunit alpha isoform 1 OS=Homo sapiens OX=9606 GN=SEC61A1 PE=1 SV=1	B4DR61_HUMAN (+1)		53 kDa	TRUE	unknown	5	5	6	5
232.2	TRUE	Empty	Protein transport protein Sec61 subunit alpha isoform 2 (Fragment) OS=Homo sapiens OX=9606 GN=SEC61A2 PE=1 SV=1	H7C069_HUMAN		16 kDa	TRUE	unknown	0	0	0	0
232.3	TRUE	Empty	Protein transport protein Sec61 subunit alpha isoform 2 (Fragment) OS=Homo sapiens OX=9606 GN=SEC61A2 PE=1 SV=1	C9JJV4_HUMAN (+1)		21 kDa	TRUE	unknown	0	0	0	0
233	TRUE	Empty	Cytochrome b5 type B OS=Homo sapiens OX=9606 GN=CYB5B PE=1 SV=2	CYB5B_HUMAN (+2)		16 kDa		unknown	7	8	8	6
234	TRUE	Empty	Delta(24)-sterol reductase OS=Homo sapiens OX=9606 GN=DHCR24 PE=1 SV=1	Q3LIE7_HUMAN (+2)		49 kDa		unknown	6	6	6	7
235	TRUE	Empty	Thioredoxin-related transmembrane protein 1 OS=Homo sapiens OX=9606 GN=TMX1 PE=1 SV=1	TMX1_HUMAN		32 kDa		unknown	7	7	5	5
236	TRUE	Empty	Membrane-associated progesterone receptor component 1 OS=Homo sapiens OX=9606 GN=PGRMC1 PE=1 SV=3	sp|O00264|PGRC1_HUMAN		22 kDa	TRUE	unknown	5	7	6	6
237	TRUE	Empty	Heterogeneous nuclear ribonucleoproteins A2/B1 OS=Homo sapiens OX=9606 GN=HNRNPA2B1 PE=1 SV=2	sp|P22626|ROA2_HUMAN		37 kDa	TRUE	unknown	4	7	11	10
238	TRUE	Empty	Carnitine O-palmitoyltransferase 1, liver isoform OS=Homo sapiens OX=9606 GN=CPT1A PE=1 SV=2	sp|P50416|CPT1A_HUMAN		88 kDa		unknown	9	6	7	7
239	TRUE	Empty	40S ribosomal protein S9 OS=Homo sapiens OX=9606 GN=RPS9 PE=1 SV=1	A0A024R4M0_HUMAN (+1)		23 kDa		unknown	2	6	6	7
240	TRUE	Empty	DnaJ homolog subfamily B member 11 OS=Homo sapiens OX=9606 GN=DNAJB11 PE=1 SV=1	DJB11_HUMAN		41 kDa		unknown	4	7	8	8
241	TRUE	Empty	60S acidic ribosomal protein P0 (Fragment) OS=Homo sapiens OX=9606 GN=RPLP0 PE=1 SV=1	F8VU65_HUMAN (+1)		27 kDa		unknown	7	7	7	6
242	TRUE	Empty	RNA-binding protein FUS OS=Homo sapiens OX=9606 GN=FUS PE=1 SV=1	H3BPE7_HUMAN (+2)		53 kDa		unknown	4	5	8	9
243	TRUE	Empty	Eukaryotic initiation factor 4A-III OS=Homo sapiens OX=9606 GN=EIF4A3 PE=1 SV=4	IF4A3_HUMAN		47 kDa	TRUE	unknown	1	1	17	11
244	TRUE	Empty	U2 snRNP auxiliary factor large subunit OS=Homo sapiens OX=9606 GN=U2AF2 PE=1 SV=1	K7ENG2_HUMAN (+2)		34 kDa		unknown	1	2	12	12
245	TRUE	Empty	Ras-related protein Rab-10 OS=Homo sapiens OX=9606 GN=RAB10 PE=1 SV=1	RAB10_HUMAN		23 kDa	TRUE	unknown	6	9	11	9
246	TRUE	Empty	40S ribosomal protein S2 OS=Homo sapiens OX=9606 GN=RPS2 PE=1 SV=2	RS2_HUMAN		31 kDa		unknown	6	5	5	10
247	TRUE	Empty	Dolichyl-diphosphooligosaccharide--protein glycosyltransferase subunit STT3B OS=Homo sapiens OX=9606 GN=STT3B PE=1 SV=1	STT3B_HUMAN		94 kDa		unknown	6	5	4	5
248	TRUE	Empty	60S ribosomal protein L12 OS=Homo sapiens OX=9606 GN=RPL12 PE=1 SV=1	sp|P30050|RL12_HUMAN		18 kDa		unknown	6	8	7	8
249	TRUE	Empty	ATP-dependent RNA helicase A OS=Homo sapiens OX=9606 GN=DHX9 PE=1 SV=4	sp|Q08211|DHX9_HUMAN		141 kDa		unknown	6	5	10	5
250	TRUE	Empty	Cluster of Isoform 2 of Inositol 1,4,5-trisphosphate receptor type 1 OS=Homo sapiens OX=9606 GN=ITPR1 (sp|Q14643-2|ITPR1_HUMAN)	sp|Q14643-2|ITPR1_HUMAN [5]		312 kDa	TRUE	unknown	9	7	5	5
250.1	TRUE	Empty	Isoform 2 of Inositol 1,4,5-trisphosphate receptor type 1 OS=Homo sapiens OX=9606 GN=ITPR1	sp|Q14643-2|ITPR1_HUMAN (+3)		312 kDa	TRUE	unknown	7	6	5	5
250.2	TRUE	Empty	Inositol 1,4,5-trisphosphate receptor type 2 OS=Homo sapiens OX=9606 GN=ITPR2 PE=1 SV=2	sp|Q14571|ITPR2_HUMAN		308 kDa	TRUE	unknown	3	1	0	1
251	TRUE	Empty	NF-X1-type zinc finger protein NFXL1 OS=Homo sapiens OX=9606 GN=NFXL1 PE=1 SV=2	sp|Q6ZNB6|NFXL1_HUMAN		101 kDa		unknown	7	4	6	7
252	TRUE	Empty	Cyclin-dependent kinase 11B OS=Homo sapiens OX=9606 GN=CDK11B PE=1 SV=1	A0A0D9SEI3_HUMAN (+3)		89 kDa		unknown	0	0	11	8
253	TRUE	Empty	7-dehydrocholesterol reductase OS=Homo sapiens OX=9606 GN=DHCR7 PE=1 SV=1	DHCR7_HUMAN		54 kDa		unknown	2	6	6	6
254	TRUE	Empty	Mucin-13 OS=Homo sapiens OX=9606 GN=MUC13 PE=1 SV=3	MUC13_HUMAN		55 kDa		unknown	6	7	7	6
255	TRUE	Empty	Cluster of Nucleoside diphosphate kinase OS=Homo sapiens OX=9606 GN=NME1-NME2 PE=1 SV=1 (Q32Q12_HUMAN)	Q32Q12_HUMAN [4]		33 kDa	TRUE	unknown	6	9	4	5
255.1	TRUE	Empty	Nucleoside diphosphate kinase OS=Homo sapiens OX=9606 GN=NME1-NME2 PE=1 SV=1	Q32Q12_HUMAN (+1)		33 kDa	TRUE	unknown	4	7	4	4
255.2	TRUE	Empty	Isoform 2 of Nucleoside diphosphate kinase A OS=Homo sapiens OX=9606 GN=NME1	sp|P15531-2|NDKA_HUMAN (+1)		20 kDa	TRUE	unknown	6	6	3	4
256	TRUE	Empty	Isoform C of Prelamin-A/C OS=Homo sapiens OX=9606 GN=LMNA	sp|P02545-2|LMNA_HUMAN (+2)		65 kDa		unknown	9	9	3	4
257	TRUE	Empty	Cluster of Lamina-associated polypeptide 2, isoforms beta/gamma OS=Homo sapiens OX=9606 GN=TMPO PE=1 SV=2 (sp|P42167|LAP2B_HUMAN)	sp|P42167|LAP2B_HUMAN [2]		51 kDa	TRUE	unknown	6	7	5	6
257.1	TRUE	Empty	Lamina-associated polypeptide 2, isoforms beta/gamma OS=Homo sapiens OX=9606 GN=TMPO PE=1 SV=2	sp|P42167|LAP2B_HUMAN		51 kDa	TRUE	unknown	6	6	4	5
257.2	TRUE	Empty	Lamina-associated polypeptide 2, isoform alpha OS=Homo sapiens OX=9606 GN=TMPO PE=1 SV=2	LAP2A_HUMAN		75 kDa	TRUE	unknown	4	5	5	6
258	TRUE	Empty	Spectrin alpha chain, non-erythrocytic 1 OS=Homo sapiens OX=9606 GN=SPTAN1 PE=1 SV=3	sp|Q13813|SPTN1_HUMAN		285 kDa		unknown	4	13	2	2
259	TRUE	Empty	Enhancer of mRNA-decapping protein 4 OS=Homo sapiens OX=9606 GN=EDC4 PE=1 SV=1	sp|Q6P2E9|EDC4_HUMAN		152 kDa		unknown	5	7	8	5
260	TRUE	Empty	Isoform 2 of Formin-binding protein 1 OS=Homo sapiens OX=9606 GN=FNBP1	sp|Q96RU3-2|FNBP1_HUMAN (+2)		71 kDa		unknown	10	12	0	0
261	TRUE	Empty	Acyl-CoA desaturase OS=Homo sapiens OX=9606 GN=SCD PE=1 SV=2	ACOD_HUMAN		42 kDa		unknown	5	6	7	6
262	TRUE	Empty	Fructose-bisphosphate aldolase OS=Homo sapiens OX=9606 GN=ALDOA PE=1 SV=1	J3KPS3_HUMAN (+1)		40 kDa		unknown	2	7	8	8
263	TRUE	Empty	Serine protease 56 OS=Homo sapiens OX=9606 GN=PRSS56 PE=1 SV=1	PRS56_HUMAN (+1)		65 kDa		unknown	3	6	6	8
264	TRUE	Empty	40S ribosomal protein S13 OS=Homo sapiens OX=9606 GN=RPS13 PE=1 SV=2	RS13_HUMAN		17 kDa		unknown	4	5	5	5
265	TRUE	Empty	Transmembrane 9 superfamily member 2 OS=Homo sapiens OX=9606 GN=TM9SF2 PE=1 SV=1	TM9S2_HUMAN		76 kDa		unknown	8	9	4	2
266	TRUE	Empty	Eukaryotic initiation factor 4A-I OS=Homo sapiens OX=9606 GN=EIF4A1 PE=1 SV=1	sp|P60842|IF4A1_HUMAN		46 kDa	TRUE	unknown	6	7	6	9
267	TRUE	Empty	Isoform 2 of Endoplasmic reticulum-Golgi intermediate compartment protein 1 OS=Homo sapiens OX=9606 GN=ERGIC1	sp|Q969X5-2|ERGI1_HUMAN (+1)		22 kDa		unknown	6	9	5	6
268	TRUE	Empty	Very-long-chain (3R)-3-hydroxyacyl-CoA dehydratase 3 OS=Homo sapiens OX=9606 GN=HACD3 PE=1 SV=2	sp|Q9P035|HACD3_HUMAN		43 kDa		unknown	4	6	6	8
269	TRUE	Empty	Isoform 2 of Prenylcysteine oxidase 1 OS=Homo sapiens OX=9606 GN=PCYOX1	sp|Q9UHG3-2|PCYOX_HUMAN (+1)		49 kDa		unknown	3	10	5	4
270	TRUE	Empty	CDGSH iron-sulfur domain-containing protein 2 OS=Homo sapiens OX=9606 GN=CISD2 PE=1 SV=1	CISD2_HUMAN		15 kDa		unknown	2	5	4	6
271	TRUE	Empty	Endoplasmic reticulum resident protein 29 OS=Homo sapiens OX=9606 GN=ERP29 PE=1 SV=4	ERP29_HUMAN		29 kDa		unknown	5	7	4	4
272	TRUE	Empty	Tyrosine-protein phosphatase non-receptor type 1 OS=Homo sapiens OX=9606 GN=PTPN1 PE=1 SV=1	PTN1_HUMAN		50 kDa		unknown	6	6	4	7
273	TRUE	Empty	60S ribosomal protein L6 OS=Homo sapiens OX=9606 GN=RPL6 PE=1 SV=3	RL6_HUMAN		33 kDa		unknown	5	3	8	6
274	TRUE	Empty	40S ribosomal protein S8 OS=Homo sapiens OX=9606 GN=RPS8 PE=1 SV=2	RS8_HUMAN		24 kDa		unknown	5	5	7	4
275	TRUE	Empty	Cluster of D-3-phosphoglycerate dehydrogenase OS=Homo sapiens OX=9606 GN=PHGDH PE=1 SV=4 (SERA_HUMAN)	SERA_HUMAN [3]		57 kDa	TRUE	unknown	6	7	7	6
275.1	TRUE	Empty	D-3-phosphoglycerate dehydrogenase OS=Homo sapiens OX=9606 GN=PHGDH PE=1 SV=4	SERA_HUMAN		57 kDa	TRUE	unknown	6	7	7	6
275.2	TRUE	Empty	D-3-phosphoglycerate dehydrogenase (Fragment) OS=Homo sapiens OX=9606 GN=PHGDH PE=1 SV=1	A0A286YF78_HUMAN		30 kDa	TRUE	unknown	2	3	2	2
275.3	TRUE	Empty	D-3-phosphoglycerate dehydrogenase OS=Homo sapiens OX=9606 GN=PHGDH PE=1 SV=1	A0A286YFF3_HUMAN		7 kDa	TRUE	unknown	0	0	0	0
276	TRUE	Empty	Vesicle-associated membrane protein 8 OS=Homo sapiens OX=9606 GN=VAMP8 PE=1 SV=1	VAMP8_HUMAN		11 kDa		unknown	6	7	7	4
277	TRUE	Empty	Cluster of Exportin-1 OS=Homo sapiens OX=9606 GN=XPO1 PE=1 SV=1 (XPO1_HUMAN)	XPO1_HUMAN [2]		123 kDa	TRUE	unknown	5	3	5	5
277.1	TRUE	Empty	Exportin-1 OS=Homo sapiens OX=9606 GN=XPO1 PE=1 SV=1	XPO1_HUMAN		123 kDa	TRUE	unknown	5	3	5	5
277.2	TRUE	Empty	Exportin-1 (Fragment) OS=Homo sapiens OX=9606 GN=XPO1 PE=1 SV=1	H7BZC5_HUMAN		9 kDa	TRUE	unknown	0	0	0	0
278	TRUE	Empty	Cluster of Ras-related protein Rab-1A OS=Homo sapiens OX=9606 GN=RAB1A PE=1 SV=3 (sp|P62820|RAB1A_HUMAN)	sp|P62820|RAB1A_HUMAN [2]		23 kDa	TRUE	unknown	9	12	10	8
278.1	TRUE	Empty	Ras-related protein Rab-1A OS=Homo sapiens OX=9606 GN=RAB1A PE=1 SV=3	sp|P62820|RAB1A_HUMAN		23 kDa	TRUE	unknown	8	12	10	8
278.2	TRUE	Empty	Ras-related protein Rab-1B OS=Homo sapiens OX=9606 GN=RAB1B PE=1 SV=1	RAB1B_HUMAN		22 kDa	TRUE	unknown	5	9	0	5
279	TRUE	Empty	Importin subunit beta-1 OS=Homo sapiens OX=9606 GN=KPNB1 PE=1 SV=2	sp|Q14974|IMB1_HUMAN		97 kDa		unknown	2	6	5	6
280	TRUE	Empty	Cluster of Isoform SRP55-3 of Serine/arginine-rich splicing factor 6 OS=Homo sapiens OX=9606 GN=SRSF6 (sp|Q13247-3|SRSF6_HUMAN)	sp|Q13247-3|SRSF6_HUMAN [3]		38 kDa	TRUE	unknown	1	1	7	7
280.1	TRUE	Empty	Isoform SRP55-3 of Serine/arginine-rich splicing factor 6 OS=Homo sapiens OX=9606 GN=SRSF6	sp|Q13247-3|SRSF6_HUMAN (+1)		38 kDa	TRUE	unknown	1	1	7	6
280.2	TRUE	Empty	Serine/arginine-rich splicing factor 4 OS=Homo sapiens OX=9606 GN=SRSF4 PE=1 SV=2	SRSF4_HUMAN		57 kDa	TRUE	unknown	1	0	2	2
281	TRUE	Empty	Secretory carrier-associated membrane protein OS=Homo sapiens OX=9606 GN=SCAMP1 PE=1 SV=1	A0A087WXB0_HUMAN (+1)		35 kDa		unknown	4	10	5	5
282	TRUE	Empty	ATP-dependent RNA helicase DDX1 OS=Homo sapiens OX=9606 GN=DDX1 PE=1 SV=1	A0A087X2G1_HUMAN (+3)		74 kDa		unknown	2	2	10	7
283	TRUE	Empty	Heterogeneous nuclear ribonucleoprotein A1 OS=Homo sapiens OX=9606 GN=HNRNPA1 PE=1 SV=2	F8W6I7_HUMAN (+3)		33 kDa	TRUE	unknown	3	7	7	8
284	TRUE	Empty	Cluster of Solute carrier family 2, facilitated glucose transporter member 3 OS=Homo sapiens OX=9606 GN=SLC2A3 PE=1 SV=1 (GTR3_HUMAN)	GTR3_HUMAN [2]		54 kDa	TRUE	unknown	6	6	4	6
284.1	TRUE	Empty	Solute carrier family 2, facilitated glucose transporter member 3 OS=Homo sapiens OX=9606 GN=SLC2A3 PE=1 SV=1	GTR3_HUMAN		54 kDa	TRUE	unknown	6	6	4	6
284.2	TRUE	Empty	Isoform 5 of Solute carrier family 2, facilitated glucose transporter member 14 OS=Homo sapiens OX=9606 GN=SLC2A14	sp|Q8TDB8-5|GTR14_HUMAN		58 kDa	TRUE	unknown	0	0	0	0
285	TRUE	Empty	Ribosomal protein L19 OS=Homo sapiens OX=9606 GN=RPL19 PE=1 SV=1	J3KTE4_HUMAN (+2)		23 kDa		unknown	7	8	5	4
286	TRUE	Empty	Serine/threonine-protein kinase MRCK beta OS=Homo sapiens OX=9606 GN=CDC42BPB PE=1 SV=2	MRCKB_HUMAN		194 kDa	TRUE	unknown	9	13	1	1
287	TRUE	Empty	Ras-related protein Rab-20 OS=Homo sapiens OX=9606 GN=RAB20 PE=1 SV=1	RAB20_HUMAN		26 kDa		unknown	7	7	5	5
288	TRUE	Empty	Cluster of E3 SUMO-protein ligase RanBP2 OS=Homo sapiens OX=9606 GN=RANBP2 PE=1 SV=2 (RBP2_HUMAN)	RBP2_HUMAN [4]		358 kDa	TRUE	unknown	4	8	7	3
288.1	TRUE	Empty	E3 SUMO-protein ligase RanBP2 OS=Homo sapiens OX=9606 GN=RANBP2 PE=1 SV=2	RBP2_HUMAN		358 kDa	TRUE	unknown	4	8	7	3
288.2	TRUE	Empty	RANBP2-like and GRIP domain-containing protein 8 OS=Homo sapiens OX=9606 GN=RGPD8 PE=1 SV=1	J3KQ37_HUMAN (+2)		183 kDa	TRUE	unknown	0	0	0	0
289	TRUE	Empty	Serine palmitoyltransferase 1 OS=Homo sapiens OX=9606 GN=SPTLC1 PE=1 SV=1	sp|O15269|SPTC1_HUMAN		53 kDa		unknown	5	5	6	5
290	TRUE	Empty	Isoform 2 of Prolyl 4-hydroxylase subunit alpha-1 OS=Homo sapiens OX=9606 GN=P4HA1	sp|P13674-2|P4HA1_HUMAN (+2)		61 kDa		unknown	3	7	4	7
291	TRUE	Empty	Isoform 2 of Cleavage and polyadenylation specificity factor subunit 7 OS=Homo sapiens OX=9606 GN=CPSF7	sp|Q8N684-2|CPSF7_HUMAN (+2)		51 kDa		unknown	2	4	4	6
292	TRUE	Empty	Cluster of Isoform 2 of Transportin-1 OS=Homo sapiens OX=9606 GN=TNPO1 (sp|Q92973-2|TNPO1_HUMAN)	sp|Q92973-2|TNPO1_HUMAN [3]		101 kDa	TRUE	unknown	4	7	5	5
292.1	TRUE	Empty	Isoform 2 of Transportin-1 OS=Homo sapiens OX=9606 GN=TNPO1	sp|Q92973-2|TNPO1_HUMAN (+1)		101 kDa	TRUE	unknown	4	7	5	5
292.2	TRUE	Empty	Isoform 2 of Transportin-2 OS=Homo sapiens OX=9606 GN=TNPO2	sp|O14787-2|TNPO2_HUMAN		100 kDa	TRUE	unknown	0	0	0	0
293	TRUE	Empty	Isoform F of Constitutive coactivator of PPAR-gamma-like protein 1 OS=Homo sapiens OX=9606 GN=FAM120A	sp|Q9NZB2-6|F120A_HUMAN (+1)		125 kDa		unknown	3	4	7	7
294	TRUE	Empty	Isoform B of Ras GTPase-activating protein-binding protein 2 OS=Homo sapiens OX=9606 GN=G3BP2	sp|Q9UN86-2|G3BP2_HUMAN		51 kDa	TRUE	unknown	5	7	9	7
295	TRUE	Empty	Arfaptin-2 OS=Homo sapiens OX=9606 GN=ARFIP2 PE=1 SV=1	A0A087X1E4_HUMAN		42 kDa		unknown	6	7	4	5
296	TRUE	Empty	Myosin light polypeptide 6 OS=Homo sapiens OX=9606 GN=MYL6 PE=1 SV=1	B7Z6Z4_HUMAN (+6)		27 kDa		unknown	5	8	4	5
297	TRUE	Empty	Calmodulin-1 OS=Homo sapiens OX=9606 GN=CALM1 PE=1 SV=1	CALM1_HUMAN (+5)		17 kDa		unknown	4	7	4	3
298	TRUE	Empty	Cluster of 10 kDa heat shock protein, mitochondrial OS=Homo sapiens OX=9606 GN=HSPE1 PE=1 SV=2 (CH10_HUMAN)	CH10_HUMAN [2]		11 kDa	TRUE	unknown	4	4	4	6
298.1	TRUE	Empty	10 kDa heat shock protein, mitochondrial OS=Homo sapiens OX=9606 GN=HSPE1 PE=1 SV=2	CH10_HUMAN		11 kDa	TRUE	unknown	3	4	4	6
298.2	TRUE	Empty	HSPE1-MOB4 readthrough OS=Homo sapiens OX=9606 GN=HSPE1-MOB4 PE=3 SV=1	S4R3N1_HUMAN		30 kDa	TRUE	unknown	1	1	0	2
299	TRUE	Empty	Cleavage and polyadenylation specificity factor subunit 5 OS=Homo sapiens OX=9606 GN=NUDT21 PE=1 SV=1	CPSF5_HUMAN		26 kDa		unknown	5	5	6	7
300	TRUE	Empty	DnaJ homolog subfamily A member 2 OS=Homo sapiens OX=9606 GN=DNAJA2 PE=1 SV=1	DNJA2_HUMAN		46 kDa		unknown	3	6	5	5
301	TRUE	Empty	RNA-binding protein with serine-rich domain 1 (Fragment) OS=Homo sapiens OX=9606 GN=RNPS1 PE=1 SV=1	H3BMM9_HUMAN (+3)		32 kDa		unknown	2	5	7	7
302	TRUE	Empty	Lamin-B1 OS=Homo sapiens OX=9606 GN=LMNB1 PE=1 SV=2	LMNB1_HUMAN		66 kDa		unknown	5	5	2	2
303	TRUE	Empty	Microfibrillar-associated protein 1 OS=Homo sapiens OX=9606 GN=MFAP1 PE=1 SV=2	MFAP1_HUMAN		52 kDa		unknown	1	1	10	10
304	TRUE	Empty	Sterol-4-alpha-carboxylate 3-dehydrogenase, decarboxylating OS=Homo sapiens OX=9606 GN=NSDHL PE=1 SV=2	NSDHL_HUMAN		42 kDa		unknown	4	7	5	4
305	TRUE	Empty	Serine/threonine-protein phosphatase 1 regulatory subunit 10 OS=Homo sapiens OX=9606 GN=PPP1R10 PE=1 SV=1	PP1RA_HUMAN		99 kDa		unknown	3	1	8	6
306	TRUE	Empty	Ras-related protein Rab-9A OS=Homo sapiens OX=9606 GN=RAB9A PE=1 SV=1	RAB9A_HUMAN		23 kDa		unknown	7	5	7	5
307	TRUE	Empty	Transmembrane emp24 domain-containing protein 10 OS=Homo sapiens OX=9606 GN=TMED10 PE=1 SV=2	TMEDA_HUMAN		25 kDa		unknown	3	7	4	4
308	TRUE	Empty	Isoform 2 of Importin-5 OS=Homo sapiens OX=9606 GN=IPO5	sp|O00410-2|IPO5_HUMAN		117 kDa		unknown	3	6	4	7
309	TRUE	Empty	Isoform 2 of U2 snRNP-associated SURP motif-containing protein OS=Homo sapiens OX=9606 GN=U2SURP	sp|O15042-2|SR140_HUMAN (+1)		118 kDa		unknown	0	0	9	3
310	TRUE	Empty	Isoform 2 of cAMP-dependent protein kinase type II-alpha regulatory subunit OS=Homo sapiens OX=9606 GN=PRKAR2A	sp|P13861-2|KAP2_HUMAN (+1)		43 kDa		unknown	6	5	4	4
311	TRUE	Empty	T-complex protein 1 subunit gamma OS=Homo sapiens OX=9606 GN=CCT3 PE=1 SV=4	sp|P49368|TCPG_HUMAN		61 kDa		unknown	4	6	6	5
312	TRUE	Empty	Isoform 2 of Ras-related protein Rab-5C OS=Homo sapiens OX=9606 GN=RAB5C	sp|P51148-2|RAB5C_HUMAN (+1)		27 kDa	TRUE	unknown	7	13	7	7
313	TRUE	Empty	Isoform 4 of Nostrin OS=Homo sapiens OX=9606 GN=NOSTRIN	sp|Q8IVI9-4|NOSTN_HUMAN (+1)		64 kDa		unknown	4	8	6	2
314	TRUE	Empty	Cluster of Isoform 4 of Acetyl-CoA carboxylase 1 OS=Homo sapiens OX=9606 GN=ACACA (sp|Q13085-4|ACACA_HUMAN)	sp|Q13085-4|ACACA_HUMAN [4]		270 kDa	TRUE	unknown	2	4	5	4
314.1	TRUE	Empty	Isoform 4 of Acetyl-CoA carboxylase 1 OS=Homo sapiens OX=9606 GN=ACACA	sp|Q13085-4|ACACA_HUMAN (+1)		270 kDa	TRUE	unknown	2	4	5	4
314.2	TRUE	Empty	Isoform 2 of Acetyl-CoA carboxylase 2 OS=Homo sapiens OX=9606 GN=ACACB	sp|O00763-2|ACACB_HUMAN (+1)		268 kDa	TRUE	unknown	0	0	0	0
315	TRUE	Empty	Cluster of Ceramide synthase 2 OS=Homo sapiens OX=9606 GN=CERS2 PE=1 SV=1 (CERS2_HUMAN)	CERS2_HUMAN [2]		45 kDa	TRUE	unknown	5	6	3	4
315.1	TRUE	Empty	Ceramide synthase 2 OS=Homo sapiens OX=9606 GN=CERS2 PE=1 SV=1	CERS2_HUMAN		45 kDa	TRUE	unknown	5	6	3	4
315.2	TRUE	Empty	Ceramide synthase 2 (Fragment) OS=Homo sapiens OX=9606 GN=CERS2 PE=1 SV=2	H0YLQ6_HUMAN		27 kDa	TRUE	unknown	4	0	0	3
316	TRUE	Empty	Cluster of 60S ribosomal protein L9 OS=Homo sapiens OX=9606 GN=RPL9 PE=1 SV=1 (RL9_HUMAN)	RL9_HUMAN [2]		22 kDa	TRUE	unknown	3	3	9	7
316.1	TRUE	Empty	60S ribosomal protein L9 OS=Homo sapiens OX=9606 GN=RPL9 PE=1 SV=1	RL9_HUMAN		22 kDa	TRUE	unknown	3	3	9	7
316.2	TRUE	Empty	60S ribosomal protein L9 (Fragment) OS=Homo sapiens OX=9606 GN=RPL9 PE=1 SV=1	H0Y9V9_HUMAN		22 kDa	TRUE	unknown	0	0	8	6
317	TRUE	Empty	Cluster of Putative RNA-binding protein Luc7-like 2 OS=Homo sapiens OX=9606 GN=LUC7L2 PE=1 SV=2 (sp|Q9Y383|LC7L2_HUMAN)	sp|Q9Y383|LC7L2_HUMAN [2]		47 kDa	TRUE	unknown	4	4	13	12
317.1	TRUE	Empty	Putative RNA-binding protein Luc7-like 2 OS=Homo sapiens OX=9606 GN=LUC7L2 PE=1 SV=2	sp|Q9Y383|LC7L2_HUMAN		47 kDa	TRUE	unknown	4	4	13	12
317.2	TRUE	Empty	Isoform 3 of Putative RNA-binding protein Luc7-like 2 OS=Homo sapiens OX=9606 GN=LUC7L2	sp|Q9Y383-3|LC7L2_HUMAN		46 kDa	TRUE	unknown	0	0	0	0
318	TRUE	Empty	60S ribosomal protein L17 (Fragment) OS=Homo sapiens OX=9606 GN=RPL17 PE=3 SV=1	A0A087WXM6_HUMAN (+5)		20 kDa		unknown	4	3	7	5
319	TRUE	Empty	Cytochrome b5 OS=Homo sapiens GN=CYB5A PE=1 SV=2	CYB5_HUMAN (+1)	CYB5A	15 kDa		unknown	7	7	4	5
320	TRUE	Empty	Emerin OS=Homo sapiens OX=9606 GN=EMD PE=1 SV=1	EMD_HUMAN		29 kDa		unknown	7	6	5	5
321	TRUE	Empty	Cluster of Ras-related protein Rab-32 OS=Homo sapiens OX=9606 GN=RAB32 PE=1 SV=3 (RAB32_HUMAN)	RAB32_HUMAN [2]		25 kDa	TRUE	unknown	7	5	4	5
321.1	TRUE	Empty	Ras-related protein Rab-32 OS=Homo sapiens OX=9606 GN=RAB32 PE=1 SV=3	RAB32_HUMAN		25 kDa	TRUE	unknown	7	5	4	5
321.2	TRUE	Empty	Ras-related protein Rab-7L1 OS=Homo sapiens OX=9606 GN=RAB29 PE=1 SV=1	RAB7L_HUMAN		23 kDa	TRUE	unknown	0	0	0	0
322	TRUE	Empty	60S ribosomal protein L7a OS=Homo sapiens OX=9606 GN=RPL7A PE=1 SV=2	RL7A_HUMAN		30 kDa		unknown	3	6	7	6
323	TRUE	Empty	Isoform 2 of Membrane-associated progesterone receptor component 2 OS=Homo sapiens OX=9606 GN=PGRMC2	sp|O15173-2|PGRC2_HUMAN (+1)		26 kDa	TRUE	unknown	5	8	3	3
324	TRUE	Empty	E3 UFM1-protein ligase 1 OS=Homo sapiens OX=9606 GN=UFL1 PE=1 SV=2	sp|O94874|UFL1_HUMAN		90 kDa		unknown	5	5	3	3
325	TRUE	Empty	Isoform 2 of NADH-cytochrome b5 reductase 3 OS=Homo sapiens OX=9606 GN=CYB5R3	sp|P00387-2|NB5R3_HUMAN (+2)		32 kDa		unknown	4	5	4	4
326	TRUE	Empty	X-ray repair cross-complementing protein 6 OS=Homo sapiens OX=9606 GN=XRCC6 PE=1 SV=2	sp|P12956|XRCC6_HUMAN		70 kDa		unknown	3	4	4	4
327	TRUE	Empty	Aspartate--tRNA ligase, cytoplasmic OS=Homo sapiens OX=9606 GN=DARS PE=1 SV=2	sp|P14868|SYDC_HUMAN		57 kDa		unknown	4	3	3	5
328	TRUE	Empty	Cluster of Isoform 2 of Ras-related protein Rab-6A OS=Homo sapiens OX=9606 GN=RAB6A (sp|P20340-2|RAB6A_HUMAN)	sp|P20340-2|RAB6A_HUMAN [4]		24 kDa	TRUE	unknown	4	6	9	5
328.1	TRUE	Empty	Isoform 2 of Ras-related protein Rab-6A OS=Homo sapiens OX=9606 GN=RAB6A	sp|P20340-2|RAB6A_HUMAN (+1)		24 kDa	TRUE	unknown	2	4	7	3
328.2	TRUE	Empty	Ras-related protein Rab-6B OS=Homo sapiens OX=9606 GN=RAB6B PE=1 SV=1	sp|Q9NRW1|RAB6B_HUMAN		23 kDa	TRUE	unknown	2	4	5	3
328.3	TRUE	Empty	Rab6C OS=Homo sapiens OX=9606 GN=RAB6C PE=2 SV=1	Q53S08_HUMAN		28 kDa	TRUE	unknown	1	1	2	1
329	TRUE	Empty	Splicing factor, proline- and glutamine-rich OS=Homo sapiens OX=9606 GN=SFPQ PE=1 SV=2	sp|P23246|SFPQ_HUMAN		76 kDa	TRUE	unknown	2	3	7	8
330	TRUE	Empty	Methionine--tRNA ligase, cytoplasmic OS=Homo sapiens OX=9606 GN=MARS PE=1 SV=2	sp|P56192|SYMC_HUMAN		101 kDa		unknown	5	5	6	4
331	TRUE	Empty	Aspartyl/asparaginyl beta-hydroxylase OS=Homo sapiens OX=9606 GN=ASPH PE=1 SV=3	sp|Q12797|ASPH_HUMAN		86 kDa	TRUE	unknown	5	7	4	5
332	TRUE	Empty	Isoform 4 of Serine/arginine-rich splicing factor 7 OS=Homo sapiens OX=9606 GN=SRSF7	sp|Q16629-4|SRSF7_HUMAN (+1)		26 kDa	TRUE	unknown	1	4	9	7
333	TRUE	Empty	Pre-mRNA-splicing factor 38A OS=Homo sapiens OX=9606 GN=PRPF38A PE=1 SV=1	sp|Q8NAV1|PR38A_HUMAN		37 kDa		unknown	3	4	9	5
334	TRUE	Empty	Fanconi anemia group I protein OS=Homo sapiens OX=9606 GN=FANCI PE=1 SV=4	sp|Q9NVI1|FANCI_HUMAN		149 kDa		unknown	7	6	4	3
335	TRUE	Empty	Isoform PKP3b of Plakophilin-3 OS=Homo sapiens OX=9606 GN=PKP3	sp|Q9Y446-2|PKP3_HUMAN (+1)		89 kDa		unknown	3	8	5	5
336	TRUE	Empty	Cluster of BTB/POZ domain-containing protein KCTD3 OS=Homo sapiens OX=9606 GN=KCTD3 PE=1 SV=2 (sp|Q9Y597|KCTD3_HUMAN)	sp|Q9Y597|KCTD3_HUMAN [2]		89 kDa	TRUE	unknown	6	7	2	1
336.1	TRUE	Empty	BTB/POZ domain-containing protein KCTD3 OS=Homo sapiens OX=9606 GN=KCTD3 PE=1 SV=2	sp|Q9Y597|KCTD3_HUMAN		89 kDa	TRUE	unknown	6	7	2	1
336.2	TRUE	Empty	BTB/POZ domain-containing protein KCTD3 (Fragment) OS=Homo sapiens OX=9606 GN=KCTD3 PE=1 SV=1	H0Y5P8_HUMAN		18 kDa	TRUE	unknown	0	4	1	0
337	TRUE	Empty	Cluster of Transformer-2 protein homolog beta OS=Homo sapiens OX=9606 GN=TRA2B PE=1 SV=1 (sp|P62995|TRA2B_HUMAN)	sp|P62995|TRA2B_HUMAN [5]		34 kDa	TRUE	unknown	0	0	6	6
337.1	TRUE	Empty	Transformer-2 protein homolog beta OS=Homo sapiens OX=9606 GN=TRA2B PE=1 SV=1	sp|P62995|TRA2B_HUMAN		34 kDa	TRUE	unknown	0	0	5	5
337.2	TRUE	Empty	Isoform 3 of Transformer-2 protein homolog alpha OS=Homo sapiens OX=9606 GN=TRA2A	sp|Q13595-3|TRA2A_HUMAN (+2)		21 kDa	TRUE	unknown	0	0	3	2
337.3	TRUE	Empty	Transformer-2 protein homolog beta (Fragment) OS=Homo sapiens OX=9606 GN=TRA2B PE=1 SV=1	H7BXF3_HUMAN		15 kDa	TRUE	unknown	0	0	0	0
338	TRUE	Empty	Cathepsin D OS=Homo sapiens OX=9606 GN=CTSD PE=1 SV=1	A0A1B0GV23_HUMAN (+4)		44 kDa		unknown	4	4	6	6
339	TRUE	Empty	Trifunctional enzyme subunit alpha, mitochondrial OS=Homo sapiens OX=9606 GN=HADHA PE=1 SV=2	ECHA_HUMAN		83 kDa		unknown	4	7	6	5
340	TRUE	Empty	Signal transducer and activator of transcription OS=Homo sapiens OX=9606 GN=STAT3 PE=1 SV=1	G8JLH9_HUMAN (+2)		76 kDa		unknown	6	4	5	2
341	TRUE	Empty	Apolipoprotein L2 OS=Homo sapiens OX=9606 GN=APOL2 PE=1 SV=2	J3KQL8_HUMAN		49 kDa		unknown	5	4	4	3
342	TRUE	Empty	Leucine-rich repeat-containing protein 40 OS=Homo sapiens OX=9606 GN=LRRC40 PE=1 SV=1	LRC40_HUMAN		68 kDa		unknown	5	5	5	5
343	TRUE	Empty	Myristoylated alanine-rich C-kinase substrate OS=Homo sapiens OX=9606 GN=MARCKS PE=1 SV=4	MARCS_HUMAN		32 kDa		unknown	8	7	3	3
344	TRUE	Empty	Vesicle-trafficking protein SEC22b OS=Homo sapiens OX=9606 GN=SEC22B PE=1 SV=4	SC22B_HUMAN		25 kDa		unknown	4	5	8	5
345	TRUE	Empty	Ankyrin repeat domain-containing protein SOWAHC OS=Homo sapiens OX=9606 GN=SOWAHC PE=1 SV=1	SWAHC_HUMAN		56 kDa		unknown	7	10	1	1
346	TRUE	Empty	Isoform 3 of Beta-galactosidase OS=Homo sapiens OX=9606 GN=GLB1	sp|P16278-3|BGAL_HUMAN (+1)		73 kDa		unknown	3	3	5	4
347	TRUE	Empty	Sterol O-acyltransferase 1 OS=Homo sapiens OX=9606 GN=SOAT1 PE=1 SV=3	sp|P35610|SOAT1_HUMAN		65 kDa		unknown	5	7	2	3
348	TRUE	Empty	Monocarboxylate transporter 1 OS=Homo sapiens OX=9606 GN=SLC16A1 PE=1 SV=3	sp|P53985|MOT1_HUMAN		54 kDa		unknown	4	6	5	7
349	TRUE	Empty	Cluster of 14-3-3 protein epsilon OS=Homo sapiens OX=9606 GN=YWHAE PE=1 SV=1 (sp|P62258|1433E_HUMAN)	sp|P62258|1433E_HUMAN [2]		29 kDa	TRUE	unknown	5	9	5	5
349.1	TRUE	Empty	14-3-3 protein epsilon OS=Homo sapiens OX=9606 GN=YWHAE PE=1 SV=1	sp|P62258|1433E_HUMAN		29 kDa	TRUE	unknown	5	9	5	5
349.2	TRUE	Empty	14-3-3 protein epsilon (Fragment) OS=Homo sapiens OX=9606 GN=YWHAE PE=1 SV=1	K7EIT4_HUMAN		13 kDa	TRUE	unknown	0	0	0	0
350	TRUE	Empty	Very-long-chain 3-oxoacyl-CoA reductase OS=Homo sapiens OX=9606 GN=HSD17B12 PE=1 SV=2	sp|Q53GQ0|DHB12_HUMAN		34 kDa		unknown	6	4	4	5
351	TRUE	Empty	Insulin-like growth factor 2 mRNA-binding protein 1 OS=Homo sapiens OX=9606 GN=IGF2BP1 PE=1 SV=2	sp|Q9NZI8|IF2B1_HUMAN		63 kDa	TRUE	unknown	2	1	6	8
352	TRUE	Empty	Cluster of RNA-binding protein 14 OS=Homo sapiens OX=9606 GN=RBM14 PE=1 SV=2 (sp|Q96PK6|RBM14_HUMAN)	sp|Q96PK6|RBM14_HUMAN [2]		69 kDa	TRUE	unknown	3	6	4	6
352.1	TRUE	Empty	RNA-binding protein 14 OS=Homo sapiens OX=9606 GN=RBM14 PE=1 SV=2	sp|Q96PK6|RBM14_HUMAN		69 kDa	TRUE	unknown	3	6	4	6
352.2	TRUE	Empty	RBM14-RBM4 readthrough OS=Homo sapiens OX=9606 GN=RBM14-RBM4 PE=4 SV=1	A0A0A0MSL8_HUMAN		16 kDa	TRUE	unknown	0	0	0	0
353	TRUE	Empty	Lysophosphatidylcholine acyltransferase 1 (Fragment) OS=Homo sapiens OX=9606 GN=LPCAT1 PE=1 SV=1	A0A0G2JQ62_HUMAN (+1)		54 kDa		unknown	1	3	5	6
354	TRUE	Empty	Probable ATP-dependent RNA helicase DDX52 OS=Homo sapiens OX=9606 GN=DDX52 PE=1 SV=3	DDX52_HUMAN		68 kDa		unknown	2	7	6	4
355	TRUE	Empty	Cluster of Erlin-2 (Fragment) OS=Homo sapiens OX=9606 GN=ERLIN2 PE=1 SV=1 (E5RHW4_HUMAN)	E5RHW4_HUMAN [2]		38 kDa	TRUE	unknown	5	6	5	4
355.1	TRUE	Empty	Erlin-2 (Fragment) OS=Homo sapiens OX=9606 GN=ERLIN2 PE=1 SV=1	E5RHW4_HUMAN		38 kDa	TRUE	unknown	5	6	4	3
355.2	TRUE	Empty	Erlin-1 OS=Homo sapiens OX=9606 GN=ERLIN1 PE=1 SV=1	ERLN1_HUMAN		39 kDa	TRUE	unknown	2	0	3	2
356	TRUE	Empty	60S ribosomal protein L8 (Fragment) OS=Homo sapiens OX=9606 GN=RPL8 PE=1 SV=1	E9PKZ0_HUMAN (+1)		22 kDa		unknown	3	4	5	4
357	TRUE	Empty	Ras-related protein Rab-35 (Fragment) OS=Homo sapiens OX=9606 GN=RAB35 PE=1 SV=1	F5H157_HUMAN (+1)		21 kDa	TRUE	unknown	7	9	10	9
358	TRUE	Empty	60S ribosomal protein L18 OS=Homo sapiens OX=9606 GN=RPL18 PE=1 SV=1	G3V203_HUMAN (+2)		19 kDa		unknown	2	5	4	3
359	TRUE	Empty	G protein-coupled receptor kinase 5 OS=Homo sapiens OX=9606 GN=GRK5 PE=1 SV=1	GRK5_HUMAN		68 kDa		unknown	8	9	1	1
360	TRUE	Empty	Histone H4 OS=Homo sapiens OX=9606 GN=HIST1H4A PE=1 SV=2	H4_HUMAN		11 kDa		unknown	2	6	6	7
361	TRUE	Empty	Cluster of Hemoglobin subunit alpha OS=Homo sapiens GN=HBA1 PE=1 SV=2 (HBA_HUMAN)	HBA_HUMAN [2]	HBA1	15 kDa	TRUE	unknown	3	5	2	5
361.1	TRUE	Empty	Hemoglobin subunit alpha OS=Homo sapiens GN=HBA1 PE=1 SV=2	HBA_HUMAN	HBA1	15 kDa	TRUE	unknown	2	4	2	4
361.2	TRUE	Empty	HCG1745306, isoform CRA_a OS=Homo sapiens OX=9606 GN=HBA2 PE=1 SV=1	G3V1N2_HUMAN		12 kDa	TRUE	unknown	2	3	1	4
362	TRUE	Empty	Ragulator complex protein LAMTOR1 OS=Homo sapiens OX=9606 GN=LAMTOR1 PE=1 SV=2	LTOR1_HUMAN		18 kDa		unknown	4	6	5	6
363	TRUE	Empty	Peptidyl-prolyl cis-trans isomerase A OS=Homo sapiens GN=PPIA PE=1 SV=2	PPIA_HUMAN	PPIA	18 kDa		unknown	3	3	6	3
364	TRUE	Empty	Torsin-1A-interacting protein 2 OS=Homo sapiens OX=9606 GN=TOR1AIP2 PE=1 SV=1	TOIP2_HUMAN		51 kDa	TRUE	unknown	5	10	4	3
365	TRUE	Empty	AP-2 complex subunit alpha-2 OS=Homo sapiens OX=9606 GN=AP2A2 PE=1 SV=2	sp|O94973|AP2A2_HUMAN		104 kDa	TRUE	unknown	5	13	8	3
366	TRUE	Empty	U1 small nuclear ribonucleoprotein 70 kDa OS=Homo sapiens OX=9606 GN=SNRNP70 PE=1 SV=2	sp|P08621|RU17_HUMAN		52 kDa		unknown	0	0	6	5
367	TRUE	Empty	Isoform 4 of Non-specific lipid-transfer protein OS=Homo sapiens OX=9606 GN=SCP2	sp|P22307-4|NLTP_HUMAN (+3)		50 kDa		unknown	4	5	5	6
368	TRUE	Empty	Sperm-associated antigen 1 OS=Homo sapiens OX=9606 GN=SPAG1 PE=1 SV=3	sp|Q07617|SPAG1_HUMAN		104 kDa		unknown	6	7	2	2
369	TRUE	Empty	Non-POU domain-containing octamer-binding protein OS=Homo sapiens OX=9606 GN=NONO PE=1 SV=4	sp|Q15233|NONO_HUMAN		54 kDa	TRUE	unknown	3	5	6	5
370	TRUE	Empty	Nuclear fragile X mental retardation-interacting protein 2 OS=Homo sapiens OX=9606 GN=NUFIP2 PE=1 SV=1	sp|Q7Z417|NUFP2_HUMAN		76 kDa		unknown	0	1	9	7
371	TRUE	Empty	Isoform 2 of E3 ubiquitin-protein ligase HUWE1 OS=Homo sapiens OX=9606 GN=HUWE1	sp|Q7Z6Z7-2|HUWE1_HUMAN (+2)		480 kDa		unknown	4	6	3	5
372	TRUE	Empty	Isoform 2 of ER membrane protein complex subunit 1 OS=Homo sapiens OX=9606 GN=EMC1	sp|Q8N766-2|EMC1_HUMAN (+3)		112 kDa		unknown	4	7	4	3
373	TRUE	Empty	Isoform 2 of Ras-related protein Rab-34 OS=Homo sapiens OX=9606 GN=RAB34	sp|Q9BZG1-2|RAB34_HUMAN (+1)		28 kDa		unknown	4	5	6	6
374	TRUE	Empty	Feline leukemia virus subgroup C receptor-related protein 1 OS=Homo sapiens OX=9606 GN=FLVCR1 PE=1 SV=1	sp|Q9Y5Y0|FLVC1_HUMAN		60 kDa		unknown	4	6	3	6
375	TRUE	Empty	60S ribosomal protein L30 (Fragment) OS=Homo sapiens OX=9606 GN=RPL30 PE=1 SV=1	E5RI99_HUMAN (+1)		13 kDa		unknown	5	5	4	6
376	TRUE	Empty	Serine/threonine-protein phosphatase 2A 65 kDa regulatory subunit A alpha isoform OS=Homo sapiens OX=9606 GN=PPP2R1A PE=1 SV=4	2AAA_HUMAN		65 kDa		unknown	8	4	3	2
377	TRUE	Empty	Heme oxygenase 2 OS=Homo sapiens OX=9606 GN=HMOX2 PE=1 SV=1	A0A087WT44_HUMAN (+2)		42 kDa		unknown	5	8	4	3
378	TRUE	Empty	Ribosome-binding protein 1 OS=Homo sapiens OX=9606 GN=RRBP1 PE=1 SV=1	A0A0A0MRV0_HUMAN		152 kDa		unknown	8	7	2	2
379	TRUE	Empty	Cluster of ADP-ribosylation factor 1 OS=Homo sapiens OX=9606 GN=ARF1 PE=1 SV=2 (ARF1_HUMAN)	ARF1_HUMAN [5]		21 kDa	TRUE	unknown	4	4	4	5
379.1	TRUE	Empty	ADP-ribosylation factor 1 OS=Homo sapiens OX=9606 GN=ARF1 PE=1 SV=2	ARF1_HUMAN		21 kDa	TRUE	unknown	2	3	2	3
379.2	TRUE	Empty	ADP-ribosylation factor 4 OS=Homo sapiens OX=9606 GN=ARF4 PE=1 SV=3	ARF4_HUMAN		21 kDa	TRUE	unknown	2	1	3	3
379.3	TRUE	Empty	ADP-ribosylation factor 4 OS=Homo sapiens OX=9606 GN=ARF4 PE=1 SV=1	U3KQF2_HUMAN		8 kDa	TRUE	unknown	1	1	1	1
379.4	TRUE	Empty	ADP-ribosylation factor 5 OS=Homo sapiens OX=9606 GN=ARF5 PE=1 SV=2	ARF5_HUMAN (+1)		21 kDa	TRUE	unknown	0	0	0	0
380	TRUE	Empty	Dipeptidyl peptidase 1 OS=Homo sapiens OX=9606 GN=CTSC PE=1 SV=2	CATC_HUMAN		52 kDa		unknown	4	7	3	2
381	TRUE	Empty	Mitotic interactor and substrate of PLK1 OS=Homo sapiens OX=9606 GN=MISP PE=1 SV=1	MISP_HUMAN		75 kDa		unknown	4	4	3	4
382	TRUE	Empty	Nucleobindin-1 OS=Homo sapiens OX=9606 GN=NUCB1 PE=1 SV=4	NUCB1_HUMAN		54 kDa		unknown	5	7	3	2
383	TRUE	Empty	Formin-binding protein 1-like OS=Homo sapiens OX=9606 GN=FNBP1L PE=1 SV=1	S4R347_HUMAN (+5)		71 kDa		unknown	5	6	4	3
384	TRUE	Empty	Cluster of Vesicle-associated membrane protein 3 OS=Homo sapiens OX=9606 GN=VAMP3 PE=1 SV=3 (VAMP3_HUMAN)	VAMP3_HUMAN [5]		11 kDa	TRUE	unknown	5	4	3	4
384.1	TRUE	Empty	Vesicle-associated membrane protein 3 OS=Homo sapiens OX=9606 GN=VAMP3 PE=1 SV=3	VAMP3_HUMAN		11 kDa	TRUE	unknown	4	3	2	3
384.2	TRUE	Empty	Vesicle-associated membrane protein 2 OS=Homo sapiens OX=9606 GN=VAMP2 PE=4 SV=1	F8WCA0_HUMAN (+3)		13 kDa	TRUE	unknown	3	3	2	3
385	TRUE	Empty	Chromatin target of PRMT1 protein OS=Homo sapiens OX=9606 GN=CHTOP PE=1 SV=1	X6R700_HUMAN		24 kDa		unknown	0	1	9	7
386	TRUE	Empty	Isoform 2 of Heterogeneous nuclear ribonucleoprotein R OS=Homo sapiens OX=9606 GN=HNRNPR	sp|O43390-2|HNRPR_HUMAN (+1)		71 kDa	TRUE	unknown	0	1	10	15
387	TRUE	Empty	Isoform 2 of Coatomer subunit beta' OS=Homo sapiens OX=9606 GN=COPB2	sp|P35606-2|COPB2_HUMAN (+1)		99 kDa		unknown	3	5	1	2
388	TRUE	Empty	Golgin subfamily A member 2 OS=Homo sapiens OX=9606 GN=GOLGA2 PE=1 SV=3	sp|Q08379|GOGA2_HUMAN		113 kDa		unknown	4	7	3	4
389	TRUE	Empty	Isoform 2 of Nuclear pore complex protein Nup93 OS=Homo sapiens OX=9606 GN=NUP93	sp|Q8N1F7-2|NUP93_HUMAN		80 kDa		unknown	4	6	3	4
390	TRUE	Empty	Isoform 2 of Putative RNA-binding protein Luc7-like 1 OS=Homo sapiens OX=9606 GN=LUC7L	sp|Q9NQ29-2|LUC7L_HUMAN (+1)		38 kDa	TRUE	unknown	3	3	10	9
391	TRUE	Empty	Solute carrier family 27 (Fatty acid transporter), member 2, isoform CRA_b OS=Homo sapiens OX=9606 GN=SLC27A2 PE=1 SV=1	G3V1R7_HUMAN (+2)		44 kDa		unknown	5	4	2	2
392	TRUE	Empty	Histone H2B type 1-A OS=Homo sapiens OX=9606 GN=HIST1H2BA PE=1 SV=3	H2B1A_HUMAN (+16)		14 kDa		unknown	4	6	4	5
393	TRUE	Empty	Isoform 2 of Endoplasmic reticulum lectin 1 OS=Homo sapiens OX=9606 GN=ERLEC1	sp|Q96DZ1-2|ERLEC_HUMAN (+2)		49 kDa		unknown	3	7	3	4
394	TRUE	Empty	Cluster of Spectrin beta chain OS=Homo sapiens OX=9606 GN=SPTBN1 PE=1 SV=1 (A0A087WUZ3_HUMAN)	A0A087WUZ3_HUMAN [5]		275 kDa	TRUE	unknown	6	6	1	2
394.1	TRUE	Empty	Spectrin beta chain OS=Homo sapiens OX=9606 GN=SPTBN1 PE=1 SV=1	A0A087WUZ3_HUMAN (+1)		275 kDa	TRUE	unknown	6	6	1	2
394.2	TRUE	Empty	Isoform 2 of Spectrin beta chain, non-erythrocytic 2 OS=Homo sapiens OX=9606 GN=SPTBN2	sp|O15020-2|SPTN2_HUMAN (+1)		268 kDa	TRUE	unknown	0	0	0	0
394.3	TRUE	Empty	Isoform 2 of Spectrin beta chain, erythrocytic OS=Homo sapiens OX=9606 GN=SPTB	sp|P11277-2|SPTB1_HUMAN		268 kDa	TRUE	unknown	0	0	0	0
395	TRUE	Empty	Ensconsin OS=Homo sapiens OX=9606 GN=MAP7 PE=1 SV=1	A0A087WZ40_HUMAN (+3)		88 kDa		unknown	3	5	1	4
396	TRUE	Empty	Antigen peptide transporter 1 OS=Homo sapiens OX=9606 GN=TAP1 PE=1 SV=1	A0A140T9T7_HUMAN (+1)		87 kDa		unknown	2	4	4	4
397	TRUE	Empty	Choline-phosphate cytidylyltransferase A (Fragment) OS=Homo sapiens OX=9606 GN=PCYT1A PE=1 SV=1	C9J050_HUMAN (+2)		34 kDa		unknown	3	4	3	3
398	TRUE	Empty	Transducin beta-like protein 2 OS=Homo sapiens OX=9606 GN=TBL2 PE=1 SV=1	E9PF19_HUMAN (+1)		46 kDa		unknown	1	6	4	7
399	TRUE	Empty	Cluster of Alpha-2-HS-glycoprotein OS=Bos taurus OX=9913 GN=AHSG PE=1 SV=2 (FETUA_BOVIN)	FETUA_BOVIN [2]	AHSG	38 kDa	TRUE	unknown	5	4	3	5
399.1	TRUE	Empty	Alpha-2-HS-glycoprotein OS=Bos taurus OX=9913 GN=AHSG PE=1 SV=2	FETUA_BOVIN	AHSG	38 kDa	TRUE	unknown	5	4	3	5
399.2	TRUE	Empty	Alpha-2-HS-glycoprotein OS=Homo sapiens OX=9606 GN=AHSG PE=1 SV=1	FETUA_HUMAN		39 kDa	TRUE	unknown	0	0	0	0
400	TRUE	Empty	60S ribosomal protein L23a (Fragment) OS=Homo sapiens OX=9606 GN=RPL23A PE=1 SV=1	H7BY10_HUMAN		18 kDa		unknown	4	6	5	4
401	TRUE	Empty	Cluster of Junction plakoglobin OS=Homo sapiens OX=9606 GN=JUP PE=1 SV=3 (PLAK_HUMAN)	PLAK_HUMAN [3]		82 kDa	TRUE	unknown	3	4	6	5
401.1	TRUE	Empty	Junction plakoglobin OS=Homo sapiens OX=9606 GN=JUP PE=1 SV=3	PLAK_HUMAN		82 kDa	TRUE	unknown	3	4	6	5
401.2	TRUE	Empty	Catenin beta-1 OS=Homo sapiens OX=9606 GN=CTNNB1 PE=1 SV=1	B4DGU4_HUMAN (+1)		85 kDa	TRUE	unknown	0	0	0	0
402	TRUE	Empty	40S ribosomal protein S6 OS=Homo sapiens OX=9606 GN=RPS6 PE=1 SV=1	RS6_HUMAN		29 kDa		unknown	4	3	6	5
403	TRUE	Empty	Prohibitin OS=Homo sapiens OX=9606 GN=PHB PE=1 SV=1	sp|P35232|PHB_HUMAN		30 kDa		unknown	2	4	5	6
404	TRUE	Empty	Arginine--tRNA ligase, cytoplasmic OS=Homo sapiens OX=9606 GN=RARS PE=1 SV=2	sp|P54136|SYRC_HUMAN		75 kDa		unknown	3	3	3	5
405	TRUE	Empty	Isoform 4 of Nuclear factor NF-kappa-B p100 subunit OS=Homo sapiens OX=9606 GN=NFKB2	sp|Q00653-4|NFKB2_HUMAN (+1)		97 kDa		unknown	0	3	10	6
406	TRUE	Empty	Isoform 2 of Peroxisomal acyl-coenzyme A oxidase 1 OS=Homo sapiens OX=9606 GN=ACOX1	sp|Q15067-2|ACOX1_HUMAN (+2)		75 kDa		unknown	1	6	2	2
407	TRUE	Empty	Motile sperm domain-containing protein 2 OS=Homo sapiens OX=9606 GN=MOSPD2 PE=1 SV=1	sp|Q8NHP6|MSPD2_HUMAN		60 kDa		unknown	4	8	1	2
408	TRUE	Empty	Glutathione S-transferase kappa 1 OS=Homo sapiens OX=9606 GN=GSTK1 PE=1 SV=3	sp|Q9Y2Q3|GSTK1_HUMAN		25 kDa		unknown	1	5	5	6
409	TRUE	Empty	Cluster of AP-2 complex subunit mu OS=Homo sapiens OX=9606 GN=AP2M1 PE=1 SV=1 (A0A087WY71_HUMAN)	A0A087WY71_HUMAN [5]		50 kDa	TRUE	unknown	2	2	3	2
409.1	TRUE	Empty	AP-2 complex subunit mu OS=Homo sapiens OX=9606 GN=AP2M1 PE=1 SV=1	A0A087WY71_HUMAN (+3)		50 kDa	TRUE	unknown	2	2	3	2
409.2	TRUE	Empty	AP-2 complex subunit mu (Fragment) OS=Homo sapiens OX=9606 GN=AP2M1 PE=1 SV=1	C9JTK4_HUMAN		18 kDa	TRUE	unknown	0	0	0	0
410	TRUE	Empty	Isoform 2 of 40S ribosomal protein S20 OS=Homo sapiens OX=9606 GN=RPS20	sp|P60866-2|RS20_HUMAN (+1)		16 kDa		unknown	4	3	4	2
411	TRUE	Empty	Cluster of Cell division cycle 2, G1 to S and G2 to M, isoform CRA_a OS=Homo sapiens OX=9606 GN=CDK1 PE=1 SV=1 (A0A024QZP7_HUMAN)	A0A024QZP7_HUMAN [6]		34 kDa	TRUE	unknown	2	8	4	5
411.1	TRUE	Empty	Cell division cycle 2, G1 to S and G2 to M, isoform CRA_a OS=Homo sapiens OX=9606 GN=CDK1 PE=1 SV=1	A0A024QZP7_HUMAN (+1)		34 kDa	TRUE	unknown	2	8	4	5
411.2	TRUE	Empty	Isoform 2 of Cyclin-dependent-like kinase 5 OS=Homo sapiens OX=9606 GN=CDK5	sp|Q00535-2|CDK5_HUMAN (+1)		30 kDa	TRUE	unknown	0	0	0	0
411.3	TRUE	Empty	Isoform 2 of Cyclin-dependent kinase 9 OS=Homo sapiens OX=9606 GN=CDK9	sp|P50750-2|CDK9_HUMAN		53 kDa	TRUE	unknown	0	0	0	0
411.4	TRUE	Empty	Cyclin-dependent kinase 13 OS=Homo sapiens OX=9606 GN=CDK13 PE=1 SV=2	sp|Q14004|CDK13_HUMAN		165 kDa	TRUE	unknown	0	0	0	0
412	TRUE	Empty	Cluster of CLIP-associating protein 2 OS=Homo sapiens OX=9606 GN=CLASP2 PE=1 SV=2 (E3W994_HUMAN)	E3W994_HUMAN [4]		139 kDa	TRUE	unknown	4	5	6	2
412.1	TRUE	Empty	CLIP-associating protein 2 OS=Homo sapiens OX=9606 GN=CLASP2 PE=1 SV=2	E3W994_HUMAN (+2)		139 kDa	TRUE	unknown	4	5	6	2
412.2	TRUE	Empty	CLIP-associating protein 2 (Fragment) OS=Homo sapiens OX=9606 GN=CLASP2 PE=1 SV=1	H7C4X8_HUMAN		21 kDa	TRUE	unknown	0	0	0	0
413	TRUE	Empty	Cluster of Isoform 2 of Phosphatidylinositol-binding clathrin assembly protein OS=Homo sapiens OX=9606 GN=PICALM (sp|Q13492-2|PICAL_HUMAN)	sp|Q13492-2|PICAL_HUMAN [5]		69 kDa	TRUE	unknown	2	5	7	4
413.1	TRUE	Empty	Isoform 2 of Phosphatidylinositol-binding clathrin assembly protein OS=Homo sapiens OX=9606 GN=PICALM	sp|Q13492-2|PICAL_HUMAN (+3)		69 kDa	TRUE	unknown	2	5	7	4
413.2	TRUE	Empty	Phosphatidylinositol-binding clathrin assembly protein (Fragment) OS=Homo sapiens OX=9606 GN=PICALM PE=1 SV=1	E9PKP6_HUMAN		17 kDa	TRUE	unknown	0	0	0	0
414	TRUE	Empty	Cluster of Acetolactate synthase-like protein OS=Homo sapiens OX=9606 GN=ILVBL PE=1 SV=2 (ILVBL_HUMAN)	ILVBL_HUMAN [2]		68 kDa	TRUE	unknown	3	5	2	2
414.1	TRUE	Empty	Acetolactate synthase-like protein OS=Homo sapiens OX=9606 GN=ILVBL PE=1 SV=2	ILVBL_HUMAN		68 kDa	TRUE	unknown	3	5	2	2
414.2	TRUE	Empty	Acetolactate synthase-like protein (Fragment) OS=Homo sapiens OX=9606 GN=ILVBL PE=1 SV=8	M0QZX5_HUMAN		25 kDa	TRUE	unknown	0	0	0	0
415	TRUE	Empty	DDRGK domain-containing protein 1 OS=Homo sapiens OX=9606 GN=DDRGK1 PE=1 SV=1	A0A0A0MRX2_HUMAN (+2)		34 kDa		unknown	6	4	3	4
416	TRUE	Empty	Neutral cholesterol ester hydrolase 1 OS=Homo sapiens OX=9606 GN=NCEH1 PE=1 SV=1	A0A0A0MTJ9_HUMAN (+3)		50 kDa		unknown	4	8	1	4
417	TRUE	Empty	Transmembrane protein 33 (Fragment) OS=Homo sapiens OX=9606 GN=TMEM33 PE=1 SV=1	D6RAA6_HUMAN		25 kDa		unknown	2	3	3	3
418	TRUE	Empty	Squalene monooxygenase OS=Homo sapiens OX=9606 GN=SQLE PE=1 SV=1	E7EVQ6_HUMAN (+1)		53 kDa		unknown	4	4	1	2
419	TRUE	Empty	DnaJ homolog subfamily B member 6 OS=Homo sapiens OX=9606 GN=DNAJB6 PE=1 SV=1	E9PH18_HUMAN (+1)		24 kDa		unknown	2	6	5	4
420	TRUE	Empty	Cluster of Prohibitin-2 OS=Homo sapiens OX=9606 GN=PHB2 PE=1 SV=1 (F5GY37_HUMAN)	F5GY37_HUMAN [4]		30 kDa	TRUE	unknown	4	4	4	5
420.1	TRUE	Empty	Prohibitin-2 OS=Homo sapiens OX=9606 GN=PHB2 PE=1 SV=1	F5GY37_HUMAN (+2)		30 kDa	TRUE	unknown	4	4	4	5
420.2	TRUE	Empty	Prohibitin-2 OS=Homo sapiens OX=9606 GN=PHB2 PE=1 SV=1	F5H2D2_HUMAN		9 kDa	TRUE	unknown	0	0	0	0
421	TRUE	Empty	V-type proton ATPase subunit OS=Homo sapiens OX=9606 GN=ATP6V0D1 PE=1 SV=1	F5GYQ1_HUMAN (+2)		45 kDa		unknown	2	4	5	3
422	TRUE	Empty	CAD protein OS=Homo sapiens OX=9606 GN=CAD PE=1 SV=1	F8VPD4_HUMAN (+1)		236 kDa	TRUE	unknown	5	5	3	4
423	TRUE	Empty	Glycine--tRNA ligase OS=Homo sapiens OX=9606 GN=GARS PE=1 SV=3	GARS_HUMAN		83 kDa		unknown	3	4	3	3
424	TRUE	Empty	Guanine nucleotide-binding protein-like 3-like protein OS=Homo sapiens OX=9606 GN=GNL3L PE=1 SV=1	GNL3L_HUMAN		66 kDa		unknown	2	5	5	3
425	TRUE	Empty	Cytochrome b-c1 complex subunit 2, mitochondrial OS=Homo sapiens OX=9606 GN=UQCRC2 PE=1 SV=1	H3BRG4_HUMAN (+1)		45 kDa		unknown	3	3	5	4
426	TRUE	Empty	Ras-related protein Rap-1A OS=Homo sapiens OX=9606 GN=RAP1A PE=1 SV=1	RAP1A_HUMAN		21 kDa	TRUE	unknown	5	7	6	5
427	TRUE	Empty	60S ribosomal protein L10a OS=Homo sapiens OX=9606 GN=RPL10A PE=1 SV=2	RL10A_HUMAN		25 kDa		unknown	2	5	6	5
428	TRUE	Empty	Splicing factor U2AF 35 kDa subunit-like protein OS=Homo sapiens OX=9606 GN=U2AF1L5 PE=1 SV=1	U2AF5_HUMAN (+1)		28 kDa		unknown	1	1	9	6
429	TRUE	Empty	Cystine/glutamate transporter OS=Homo sapiens OX=9606 GN=SLC7A11 PE=1 SV=1	XCT_HUMAN		55 kDa		unknown	2	6	3	3
430	TRUE	Empty	Programmed cell death protein 6 OS=Homo sapiens OX=9606 GN=PDCD6 PE=1 SV=1	sp|O75340|PDCD6_HUMAN		22 kDa		unknown	2	6	6	4
431	TRUE	Empty	Isoform 3 of Cleft lip and palate transmembrane protein 1 OS=Homo sapiens OX=9606 GN=CLPTM1	sp|O96005-4|CLPT1_HUMAN (+1)		75 kDa		unknown	6	5	3	4
432	TRUE	Empty	Acetyl-CoA acetyltransferase, mitochondrial OS=Homo sapiens OX=9606 GN=ACAT1 PE=1 SV=1	sp|P24752|THIL_HUMAN		45 kDa		unknown	5	5	4	4
433	TRUE	Empty	Isoform 2 of Sequestosome-1 OS=Homo sapiens OX=9606 GN=SQSTM1	sp|Q13501-2|SQSTM_HUMAN (+1)		39 kDa		unknown	2	2	6	6
434	TRUE	Empty	Isoform 2 of Caprin-1 OS=Homo sapiens OX=9606 GN=CAPRIN1	sp|Q14444-2|CAPR1_HUMAN (+1)		77 kDa		unknown	4	6	2	3
435	TRUE	Empty	Isoform 2 of Hydroxysteroid dehydrogenase-like protein 2 OS=Homo sapiens OX=9606 GN=HSDL2	sp|Q6YN16-2|HSDL2_HUMAN (+1)		37 kDa		unknown	4	4	3	3
436	TRUE	Empty	Isoform 2 of DnaJ homolog subfamily C member 7 OS=Homo sapiens OX=9606 GN=DNAJC7	sp|Q99615-2|DNJC7_HUMAN (+1)		50 kDa		unknown	3	5	4	4
437	TRUE	Empty	Isoform 3 of Oxidoreductase HTATIP2 OS=Homo sapiens OX=9606 GN=HTATIP2	sp|Q9BUP3-3|HTAI2_HUMAN		30 kDa		unknown	2	3	5	5
438	TRUE	Empty	Isoform 2 of UDP-glucose:glycoprotein glucosyltransferase 1 OS=Homo sapiens OX=9606 GN=UGGT1	sp|Q9NYU2-2|UGGG1_HUMAN (+1)		175 kDa	TRUE	unknown	1	7	2	3
439	TRUE	Empty	Zinc finger protein-like 1 OS=Homo sapiens OX=9606 GN=ZFPL1 PE=1 SV=2	ZFPL1_HUMAN		34 kDa		unknown	2	6	4	4
440	TRUE	Empty	Cluster of Isoform 2 of YTH domain-containing family protein 2 OS=Homo sapiens OX=9606 GN=YTHDF2 (sp|Q9Y5A9-2|YTHD2_HUMAN)	sp|Q9Y5A9-2|YTHD2_HUMAN [3]		57 kDa	TRUE	unknown	2	3	5	5
440.1	TRUE	Empty	Isoform 2 of YTH domain-containing family protein 2 OS=Homo sapiens OX=9606 GN=YTHDF2	sp|Q9Y5A9-2|YTHD2_HUMAN (+1)		57 kDa	TRUE	unknown	2	3	4	4
440.2	TRUE	Empty	YTH domain-containing family protein 3 OS=Homo sapiens OX=9606 GN=YTHDF3 PE=1 SV=1	YTHD3_HUMAN		64 kDa	TRUE	unknown	0	0	2	2
441	TRUE	Empty	Voltage-dependent anion-selective channel protein 2 (Fragment) OS=Homo sapiens OX=9606 GN=VDAC2 PE=1 SV=1	A0A0A0MR02_HUMAN (+3)		30 kDa		unknown	0	7	3	5
442	TRUE	Empty	Lysosome membrane protein 2 OS=Homo sapiens OX=9606 GN=SCARB2 PE=1 SV=1	A0A1W2PPX5_HUMAN (+5)		49 kDa		unknown	3	5	3	4
443	TRUE	Empty	MICOS complex subunit MIC60 OS=Homo sapiens OX=9606 GN=IMMT PE=1 SV=2	B9A067_HUMAN (+4)		79 kDa		unknown	2	3	5	5
444	TRUE	Empty	Rho GTPase-activating protein 1 (Fragment) OS=Homo sapiens OX=9606 GN=ARHGAP1 PE=1 SV=1	H0YE29_HUMAN (+1)		38 kDa		unknown	4	5	4	4
445	TRUE	Empty	Eukaryotic translation initiation factor 5A (Fragment) OS=Homo sapiens OX=9606 GN=EIF5A PE=1 SV=8	I3L397_HUMAN (+3)		16 kDa		unknown	1	3	6	1
446	TRUE	Empty	Creatine kinase B-type OS=Homo sapiens OX=9606 GN=CKB PE=1 SV=1	KCRB_HUMAN		43 kDa		unknown	4	2	6	4
447	TRUE	Empty	60S ribosomal protein L13a (Fragment) OS=Homo sapiens OX=9606 GN=RPL13A PE=1 SV=2	M0QYS1_HUMAN		24 kDa		unknown	2	3	5	3
448	TRUE	Empty	LRP chaperone MESD OS=Homo sapiens OX=9606 GN=MESD PE=1 SV=2	MESD_HUMAN		26 kDa		unknown	5	2	0	2
449	TRUE	Empty	Nucleolin OS=Homo sapiens OX=9606 GN=NCL PE=1 SV=3	NUCL_HUMAN		77 kDa		unknown	4	3	4	5
450	TRUE	Empty	Translocon-associated protein subunit delta OS=Homo sapiens OX=9606 GN=SSR4 PE=1 SV=1	SSRD_HUMAN		19 kDa		unknown	2	4	4	4
451	TRUE	Empty	Isoleucine--tRNA ligase, cytoplasmic OS=Homo sapiens OX=9606 GN=IARS PE=1 SV=2	SYIC_HUMAN		145 kDa		unknown	6	3	2	2
452	TRUE	Empty	La-related protein 4 (Fragment) OS=Homo sapiens OX=9606 GN=LARP4 PE=1 SV=1	X6RLN4_HUMAN (+5)		55 kDa		unknown	3	1	6	4
453	TRUE	Empty	Isoform 2 of Syntaxin-7 OS=Homo sapiens OX=9606 GN=STX7	sp|O15400-2|STX7_HUMAN (+1)		27 kDa		unknown	3	4	5	5
454	TRUE	Empty	Isoform 2 of Heterogeneous nuclear ribonucleoprotein Q OS=Homo sapiens OX=9606 GN=SYNCRIP	sp|O60506-2|HNRPQ_HUMAN (+3)		66 kDa	TRUE	unknown	1	2	10	12
455	TRUE	Empty	Isoform 3 of Very long-chain specific acyl-CoA dehydrogenase, mitochondrial OS=Homo sapiens OX=9606 GN=ACADVL	sp|P49748-3|ACADV_HUMAN (+1)		73 kDa		unknown	2	3	2	3
456	TRUE	Empty	Isoform 2 of Protein SEC13 homolog OS=Homo sapiens OX=9606 GN=SEC13	sp|P55735-2|SEC13_HUMAN (+3)		34 kDa		unknown	4	5	4	2
457	TRUE	Empty	V-type proton ATPase 116 kDa subunit a isoform 3 OS=Homo sapiens OX=9606 GN=TCIRG1 PE=1 SV=3	sp|Q13488|VPP3_HUMAN		93 kDa		unknown	3	7	3	1
458	TRUE	Empty	Isoform 2 of 116 kDa U5 small nuclear ribonucleoprotein component OS=Homo sapiens OX=9606 GN=EFTUD2	sp|Q15029-2|U5S1_HUMAN (+1)		105 kDa	TRUE	unknown	1	0	8	6
459	TRUE	Empty	Isoform 2 of Transmembrane and coiled-coil domain-containing protein 4 OS=Homo sapiens OX=9606 GN=TMCO4	sp|Q5TGY1-2|TMCO4_HUMAN (+1)		63 kDa		unknown	2	3	4	4
460	TRUE	Empty	All-trans-retinol 13,14-reductase OS=Homo sapiens OX=9606 GN=RETSAT PE=1 SV=2	sp|Q6NUM9|RETST_HUMAN		67 kDa		unknown	1	5	3	3
461	TRUE	Empty	Isoform 4 of CDK5 regulatory subunit-associated protein 3 OS=Homo sapiens OX=9606 GN=CDK5RAP3	sp|Q96JB5-4|CK5P3_HUMAN (+1)		60 kDa		unknown	2	4	3	5
462	TRUE	Empty	Isoform 2 of Probable 28S rRNA (cytosine-C(5))-methyltransferase OS=Homo sapiens OX=9606 GN=NSUN5	sp|Q96P11-2|NSUN5_HUMAN		50 kDa		unknown	2	6	2	5
463	TRUE	Empty	Multiple myeloma tumor-associated protein 2 OS=Homo sapiens OX=9606 GN=MMTAG2 PE=1 SV=1	sp|Q9BU76|MMTA2_HUMAN		29 kDa		unknown	1	2	5	6
464	TRUE	Empty	Cluster of Transmembrane protein 165 OS=Homo sapiens OX=9606 GN=TMEM165 PE=1 SV=1 (sp|Q9HC07|TM165_HUMAN)	sp|Q9HC07|TM165_HUMAN [2]		35 kDa	TRUE	unknown	5	4	4	3
464.1	TRUE	Empty	Transmembrane protein 165 OS=Homo sapiens OX=9606 GN=TMEM165 PE=1 SV=1	sp|Q9HC07|TM165_HUMAN		35 kDa	TRUE	unknown	5	4	4	3
464.2	TRUE	Empty	Transmembrane protein 165 (Fragment) OS=Homo sapiens OX=9606 GN=TMEM165 PE=1 SV=1	V9GY93_HUMAN		17 kDa	TRUE	unknown	0	0	0	0
465	TRUE	Empty	Very-long-chain enoyl-CoA reductase OS=Homo sapiens OX=9606 GN=TECR PE=1 SV=1	sp|Q9NZ01|TECR_HUMAN		36 kDa		unknown	3	4	4	4
466	TRUE	Empty	Tapasin OS=Homo sapiens OX=9606 GN=TAPBP PE=1 SV=1	A0A0A0MSV9_HUMAN (+1)		54 kDa		unknown	3	2	3	3
467	TRUE	Empty	Cluster of Septin-9 OS=Homo sapiens OX=9606 GN=SEPT9 PE=1 SV=2 (sp|Q9UHD8|SEPT9_HUMAN)	sp|Q9UHD8|SEPT9_HUMAN [2]		65 kDa	TRUE	unknown	3	8	1	0
467.1	TRUE	Empty	Septin-9 OS=Homo sapiens OX=9606 GN=SEPT9 PE=1 SV=2	sp|Q9UHD8|SEPT9_HUMAN		65 kDa	TRUE	unknown	3	8	1	0
467.2	TRUE	Empty	Isoform 7 of Septin-9 OS=Homo sapiens OX=9606 GN=SEPT9	sp|Q9UHD8-7|SEPT9_HUMAN		64 kDa	TRUE	unknown	3	8	1	0
468	TRUE	Empty	Cluster of Isoform 2 of Myosin-10 OS=Homo sapiens OX=9606 GN=MYH10 (sp|P35580-2|MYH10_HUMAN)	sp|P35580-2|MYH10_HUMAN [11]		231 kDa	TRUE	unknown	7	4	0	0
468.1	TRUE	Empty	Isoform 2 of Myosin-10 OS=Homo sapiens OX=9606 GN=MYH10	sp|P35580-2|MYH10_HUMAN (+4)		231 kDa	TRUE	unknown	6	4	0	0
468.2	TRUE	Empty	Isoform 2 of Myosin-11 OS=Homo sapiens OX=9606 GN=MYH11	sp|P35749-2|MYH11_HUMAN (+1)		228 kDa	TRUE	unknown	0	0	0	0
468.3	TRUE	Empty	Myosin-9 OS=Homo sapiens OX=9606 GN=MYH9 PE=1 SV=4	sp|P35579|MYH9_HUMAN		227 kDa	TRUE	unknown	3	0	0	0
468.4	TRUE	Empty	Isoform 2 of Myosin-14 OS=Homo sapiens OX=9606 GN=MYH14	sp|Q7Z406-2|MYH14_HUMAN (+2)		232 kDa	TRUE	unknown	0	0	0	0
469	TRUE	Empty	ATP-dependent RNA helicase DDX3X OS=Homo sapiens OX=9606 GN=DDX3X PE=1 SV=1	A0A0D9SF53_HUMAN (+4)		81 kDa	TRUE	unknown	4	4	7	3
470	TRUE	Empty	Rab11 family-interacting protein 5 OS=Homo sapiens OX=9606 GN=RAB11FIP5 PE=1 SV=1	A0A1B0GTL5_HUMAN		138 kDa		unknown	8	6	2	0
471	TRUE	Empty	Charged multivesicular body protein 6 OS=Homo sapiens OX=9606 GN=CHMP6 PE=1 SV=3	CHMP6_HUMAN		23 kDa		unknown	4	2	2	2
472	TRUE	Empty	Heterogeneous nuclear ribonucleoprotein H OS=Homo sapiens OX=9606 GN=HNRNPH1 PE=1 SV=1	E9PCY7_HUMAN (+2)		47 kDa	TRUE	unknown	3	4	6	5
473	TRUE	Empty	ERO1-like protein alpha OS=Homo sapiens OX=9606 GN=ERO1A PE=1 SV=2	ERO1A_HUMAN		54 kDa		unknown	3	6	4	3
474	TRUE	Empty	CLIP-associating protein 1 (Fragment) OS=Homo sapiens OX=9606 GN=CLASP1 PE=1 SV=2	H0Y5T1_HUMAN		140 kDa	TRUE	unknown	3	4	3	1
475	TRUE	Empty	Hippocalcin-like protein 1 OS=Homo sapiens OX=9606 GN=HPCAL1 PE=1 SV=3	HPCL1_HUMAN		22 kDa		unknown	6	4	2	2
476	TRUE	Empty	Monocarboxylate transporter 4 OS=Homo sapiens OX=9606 GN=SLC16A3 PE=1 SV=1	MOT4_HUMAN		49 kDa		unknown	3	4	3	3
477	TRUE	Empty	Ras-related protein Rab-13 OS=Homo sapiens OX=9606 GN=RAB13 PE=1 SV=1	RAB13_HUMAN		23 kDa	TRUE	unknown	6	9	6	4
478	TRUE	Empty	40S ribosomal protein S12 OS=Homo sapiens OX=9606 GN=RPS12 PE=1 SV=3	RS12_HUMAN		15 kDa		unknown	1	2	4	5
479	TRUE	Empty	tRNA-splicing ligase RtcB homolog OS=Homo sapiens OX=9606 GN=RTCB PE=1 SV=1	RTCB_HUMAN		55 kDa		unknown	1	3	4	4
480	TRUE	Empty	Translocation protein SEC62 OS=Homo sapiens OX=9606 GN=SEC62 PE=1 SV=1	SEC62_HUMAN		46 kDa		unknown	5	5	2	3
481	TRUE	Empty	Alpha-soluble NSF attachment protein OS=Homo sapiens OX=9606 GN=NAPA PE=1 SV=3	SNAA_HUMAN		33 kDa		unknown	6	6	1	1
482	TRUE	Empty	Secretory carrier-associated membrane protein 3 OS=Homo sapiens OX=9606 GN=SCAMP3 PE=1 SV=3	sp|O14828|SCAM3_HUMAN		38 kDa		unknown	3	4	3	4
483	TRUE	Empty	Cluster of Isoform ACTN4ISO of Alpha-actinin-4 OS=Homo sapiens OX=9606 GN=ACTN4 (sp|O43707-2|ACTN4_HUMAN)	sp|O43707-2|ACTN4_HUMAN [9]		80 kDa	TRUE	unknown	3	5	4	3
483.1	TRUE	Empty	Isoform ACTN4ISO of Alpha-actinin-4 OS=Homo sapiens OX=9606 GN=ACTN4	sp|O43707-2|ACTN4_HUMAN (+1)		80 kDa	TRUE	unknown	2	4	4	3
483.2	TRUE	Empty	Isoform 2 of Alpha-actinin-1 OS=Homo sapiens OX=9606 GN=ACTN1	sp|P12814-2|ACTN1_HUMAN (+3)		103 kDa	TRUE	unknown	2	2	0	0
483.3	TRUE	Empty	Alpha-actinin-3 OS=Homo sapiens OX=9606 GN=ACTN3 PE=1 SV=2	ACTN3_HUMAN		103 kDa	TRUE	unknown	0	0	0	0
483.4	TRUE	Empty	Isoform 2 of Alpha-actinin-2 OS=Homo sapiens OX=9606 GN=ACTN2	sp|P35609-2|ACTN2_HUMAN (+1)		104 kDa	TRUE	unknown	0	0	0	0
484	TRUE	Empty	Isoform 2 of 3-hydroxy-3-methylglutaryl-coenzyme A reductase OS=Homo sapiens OX=9606 GN=HMGCR	sp|P04035-2|HMDH_HUMAN (+2)		92 kDa		unknown	4	4	5	3
485	TRUE	Empty	Isoform 2 of RNA-binding motif protein, X chromosome OS=Homo sapiens OX=9606 GN=RBMX	sp|P38159-2|RBMX_HUMAN (+1)		41 kDa		unknown	0	0	7	7
486	TRUE	Empty	Arfaptin-1 OS=Homo sapiens OX=9606 GN=ARFIP1 PE=1 SV=2	sp|P53367|ARFP1_HUMAN		42 kDa		unknown	5	3	2	3
487	TRUE	Empty	Ras-related protein Rab-5B OS=Homo sapiens OX=9606 GN=RAB5B PE=1 SV=1	sp|P61020|RAB5B_HUMAN		24 kDa	TRUE	unknown	5	9	5	6
488	TRUE	Empty	Isoform B of Phosphate carrier protein, mitochondrial OS=Homo sapiens OX=9606 GN=SLC25A3	sp|Q00325-2|MPCP_HUMAN (+1)		40 kDa		unknown	2	3	4	3
489	TRUE	Empty	Stromal interaction molecule 1 OS=Homo sapiens OX=9606 GN=STIM1 PE=1 SV=3	sp|Q13586|STIM1_HUMAN		77 kDa		unknown	4	5	1	3
490	TRUE	Empty	Isoform 3 of Transmembrane emp24 domain-containing protein 4 OS=Homo sapiens OX=9606 GN=TMED4	sp|Q7Z7H5-3|TMED4_HUMAN (+1)		21 kDa	TRUE	unknown	3	4	5	7
491	TRUE	Empty	Isoform 2 of Protein LSM14 homolog A OS=Homo sapiens OX=9606 GN=LSM14A	sp|Q8ND56-2|LS14A_HUMAN (+2)		51 kDa		unknown	1	1	3	5
492	TRUE	Empty	Programmed cell death 6-interacting protein OS=Homo sapiens OX=9606 GN=PDCD6IP PE=1 SV=1	sp|Q8WUM4|PDC6I_HUMAN		96 kDa		unknown	4	2	2	4
493	TRUE	Empty	Isoform 2 of Vacuolar protein sorting-associated protein 13A OS=Homo sapiens OX=9606 GN=VPS13A	sp|Q96RL7-2|VP13A_HUMAN (+3)		351 kDa		unknown	7	5	0	3
494	TRUE	Empty	Isoform B of Manganese-transporting ATPase 13A1 OS=Homo sapiens OX=9606 GN=ATP13A1	sp|Q9HD20-2|AT131_HUMAN (+1)		121 kDa		unknown	4	4	2	4
495	TRUE	Empty	Isoform 2 of Fibronectin type-III domain-containing protein 3A OS=Homo sapiens OX=9606 GN=FNDC3A	sp|Q9Y2H6-2|FND3A_HUMAN (+1)		126 kDa		unknown	3	5	1	3
496	TRUE	Empty	Protein THEM6 OS=Homo sapiens OX=9606 GN=THEM6 PE=1 SV=2	THEM6_HUMAN		24 kDa		unknown	3	2	2	2
497	TRUE	Empty	Cluster of Isoform 2 of Serine/threonine-protein phosphatase PP1-alpha catalytic subunit OS=Homo sapiens OX=9606 GN=PPP1CA (sp|P62136-2|PP1A_HUMAN)	sp|P62136-2|PP1A_HUMAN [4]		39 kDa	TRUE	unknown	1	3	4	6
497.1	TRUE	Empty	Isoform 2 of Serine/threonine-protein phosphatase PP1-alpha catalytic subunit OS=Homo sapiens OX=9606 GN=PPP1CA	sp|P62136-2|PP1A_HUMAN (+2)		39 kDa	TRUE	unknown	1	3	4	5
497.2	TRUE	Empty	Serine/threonine-protein phosphatase PP1-beta catalytic subunit OS=Homo sapiens OX=9606 GN=PPP1CB PE=1 SV=3	PP1B_HUMAN		37 kDa	TRUE	unknown	1	2	3	5
498	TRUE	Empty	G patch domain-containing protein 4 OS=Homo sapiens OX=9606 GN=GPATCH4 PE=1 SV=1	A0A0A0MRK1_HUMAN (+3)		42 kDa		unknown	3	4	4	3
499	TRUE	Empty	Protein unc-45 homolog A OS=Homo sapiens OX=9606 GN=UNC45A PE=1 SV=1	A0A1W2PNX8_HUMAN (+2)		118 kDa		unknown	4	5	1	0
500	TRUE	Empty	Protein canopy homolog 2 OS=Homo sapiens OX=9606 GN=CNPY2 PE=1 SV=1	CNPY2_HUMAN (+3)		21 kDa		unknown	3	4	3	4
501	TRUE	Empty	Transmembrane emp24 domain-containing protein 2 OS=Homo sapiens OX=9606 GN=TMED2 PE=1 SV=1	F5GX39_HUMAN (+1)		14 kDa		unknown	2	4	4	4
502	TRUE	Empty	Polyubiquitin-C (Fragment) OS=Homo sapiens OX=9606 GN=UBC PE=1 SV=8	F5H747_HUMAN		18 kDa		unknown	2	4	1	2
503	TRUE	Empty	Procollagen galactosyltransferase 1 OS=Homo sapiens OX=9606 GN=COLGALT1 PE=1 SV=1	GT251_HUMAN		72 kDa		unknown	2	4	1	2
504	TRUE	Empty	ATP-binding cassette sub-family B member 6, mitochondrial (Fragment) OS=Homo sapiens OX=9606 GN=ABCB6 PE=1 SV=1	H7BXK9_HUMAN (+2)		78 kDa		unknown	3	4	3	4
505	TRUE	Empty	Importin-7 OS=Homo sapiens OX=9606 GN=IPO7 PE=1 SV=1	IPO7_HUMAN		120 kDa	TRUE	unknown	4	4	2	4
506	TRUE	Empty	40S ribosomal protein S5 (Fragment) OS=Homo sapiens OX=9606 GN=RPS5 PE=1 SV=1	M0R0F0_HUMAN (+2)		22 kDa		unknown	3	4	4	3
507	TRUE	Empty	Serine/arginine-rich-splicing factor 11 (Fragment) OS=Homo sapiens OX=9606 GN=SRSF11 PE=1 SV=1	Q5T760_HUMAN (+2)		42 kDa		unknown	0	0	7	5
508	TRUE	Empty	60S ribosomal protein L23 OS=Homo sapiens OX=9606 GN=RPL23 PE=1 SV=1	RL23_HUMAN		15 kDa		unknown	3	3	4	4
509	TRUE	Empty	40S ribosomal protein S11 OS=Homo sapiens OX=9606 GN=RPS11 PE=1 SV=3	RS11_HUMAN		18 kDa		unknown	2	3	3	5
510	TRUE	Empty	Protein S100-A16 OS=Homo sapiens OX=9606 GN=S100A16 PE=1 SV=1	S10AG_HUMAN		12 kDa		unknown	2	4	5	3
511	TRUE	Empty	Transmembrane emp24 domain-containing protein 1 OS=Homo sapiens OX=9606 GN=TMED1 PE=1 SV=1	TMED1_HUMAN		25 kDa		unknown	3	4	3	3
512	TRUE	Empty	Transmembrane emp24 domain-containing protein 9 OS=Homo sapiens OX=9606 GN=TMED9 PE=1 SV=2	TMED9_HUMAN		27 kDa	TRUE	unknown	3	4	5	4
513	TRUE	Empty	Isoform 2 of Peroxisomal membrane protein PEX14 OS=Homo sapiens OX=9606 GN=PEX14	sp|O75381-2|PEX14_HUMAN (+1)		37 kDa		unknown	4	5	3	3
514	TRUE	Empty	Isoform Soluble of Catechol O-methyltransferase OS=Homo sapiens OX=9606 GN=COMT	sp|P21964-2|COMT_HUMAN (+1)		24 kDa		unknown	3	4	4	4
515	TRUE	Empty	60S ribosomal protein L13 OS=Homo sapiens OX=9606 GN=RPL13 PE=1 SV=4	sp|P26373|RL13_HUMAN		24 kDa		unknown	1	3	4	3
516	TRUE	Empty	Heterogeneous nuclear ribonucleoprotein A3 OS=Homo sapiens OX=9606 GN=HNRNPA3 PE=1 SV=2	sp|P51991|ROA3_HUMAN		40 kDa		unknown	0	1	7	5
517	TRUE	Empty	Isoform 2 of Serine/arginine-rich splicing factor 3 OS=Homo sapiens OX=9606 GN=SRSF3	sp|P84103-2|SRSF3_HUMAN (+1)		14 kDa	TRUE	unknown	2	1	11	7
518	TRUE	Empty	Serine/arginine-rich splicing factor 2 OS=Homo sapiens OX=9606 GN=SRSF2 PE=1 SV=4	sp|Q01130|SRSF2_HUMAN		25 kDa	TRUE	unknown	2	3	9	5
519	TRUE	Empty	26S proteasome non-ATPase regulatory subunit 2 OS=Homo sapiens OX=9606 GN=PSMD2 PE=1 SV=3	sp|Q13200|PSMD2_HUMAN		100 kDa		unknown	3	5	4	2
520	TRUE	Empty	Protein OS-9 OS=Homo sapiens OX=9606 GN=OS9 PE=1 SV=1	sp|Q13438|OS9_HUMAN		76 kDa		unknown	2	3	2	3
521	TRUE	Empty	Isoform 4 of E3 ubiquitin-protein ligase UBR4 OS=Homo sapiens OX=9606 GN=UBR4	sp|Q5T4S7-4|UBR4_HUMAN		574 kDa		unknown	3	5	1	3
522	TRUE	Empty	Thioredoxin domain-containing protein 5 OS=Homo sapiens OX=9606 GN=TXNDC5 PE=1 SV=2	sp|Q8NBS9|TXND5_HUMAN		48 kDa		unknown	4	2	3	3
523	TRUE	Empty	Ankyrin repeat and SAM domain-containing protein 1A OS=Homo sapiens OX=9606 GN=ANKS1A PE=1 SV=4	sp|Q92625|ANS1A_HUMAN		123 kDa		unknown	4	3	4	4
524	TRUE	Empty	Ras-related protein Rab-18 OS=Homo sapiens OX=9606 GN=RAB18 PE=1 SV=1	sp|Q9NP72|RAB18_HUMAN		23 kDa		unknown	3	4	4	3
525	TRUE	Empty	Isoform 4 of Protein diaphanous homolog 3 OS=Homo sapiens OX=9606 GN=DIAPH3	sp|Q9NSV4-4|DIAP3_HUMAN (+3)		136 kDa		unknown	3	5	4	2
526	TRUE	Empty	Cyclin-L1 OS=Homo sapiens OX=9606 GN=CCNL1 PE=1 SV=1	sp|Q9UK58|CCNL1_HUMAN		60 kDa		unknown	1	0	7	6
527	TRUE	Empty	Isoform 2 of Dehydrogenase/reductase SDR family member 7 OS=Homo sapiens OX=9606 GN=DHRS7	sp|Q9Y394-2|DHRS7_HUMAN (+1)		32 kDa		unknown	3	3	3	2
528	TRUE	Empty	40S ribosomal protein SA OS=Homo sapiens OX=9606 GN=RPSA PE=1 SV=1	A0A0C4DG17_HUMAN (+2)		33 kDa		unknown	3	3	3	2
529	TRUE	Empty	Sigma intracellular receptor 2 OS=Homo sapiens OX=9606 GN=TMEM97 PE=1 SV=1	SGMR2_HUMAN		21 kDa		unknown	3	4	3	3
530	TRUE	Empty	Cluster of Delta(3,5)-Delta(2,4)-dienoyl-CoA isomerase, mitochondrial OS=Homo sapiens OX=9606 GN=ECH1 PE=1 SV=2 (ECH1_HUMAN)	ECH1_HUMAN [2]		36 kDa	TRUE	unknown	2	4	4	3
530.1	TRUE	Empty	Delta(3,5)-Delta(2,4)-dienoyl-CoA isomerase, mitochondrial OS=Homo sapiens OX=9606 GN=ECH1 PE=1 SV=2	ECH1_HUMAN		36 kDa	TRUE	unknown	2	4	4	3
530.2	TRUE	Empty	Delta(3,5)-Delta(2,4)-dienoyl-CoA isomerase, mitochondrial (Fragment) OS=Homo sapiens OX=9606 GN=ECH1 PE=4 SV=1	M0R280_HUMAN		2 kDa	TRUE	unknown	0	0	0	0
531	TRUE	Empty	Cluster of Ras GTPase-activating protein-binding protein 1 OS=Homo sapiens OX=9606 GN=G3BP1 PE=1 SV=1 (sp|Q13283|G3BP1_HUMAN)	sp|Q13283|G3BP1_HUMAN [2]		52 kDa	TRUE	unknown	3	5	5	5
531.1	TRUE	Empty	Ras GTPase-activating protein-binding protein 1 OS=Homo sapiens OX=9606 GN=G3BP1 PE=1 SV=1	sp|Q13283|G3BP1_HUMAN		52 kDa	TRUE	unknown	3	5	5	5
531.2	TRUE	Empty	Ras GTPase-activating protein-binding protein 1 (Fragment) OS=Homo sapiens OX=9606 GN=G3BP1 PE=1 SV=1	E5RH42_HUMAN		13 kDa	TRUE	unknown	0	0	0	0
532	TRUE	Empty	Cluster of Ras-related protein Ral-A OS=Homo sapiens OX=9606 GN=RALA PE=1 SV=1 (RALA_HUMAN)	RALA_HUMAN [2]		24 kDa	TRUE	unknown	4	4	4	3
532.1	TRUE	Empty	Ras-related protein Ral-A OS=Homo sapiens OX=9606 GN=RALA PE=1 SV=1	RALA_HUMAN		24 kDa	TRUE	unknown	4	4	4	3
532.2	TRUE	Empty	Ras-related protein Ral-A (Fragment) OS=Homo sapiens OX=9606 GN=RALA PE=1 SV=1	H7C3P7_HUMAN		18 kDa	TRUE	unknown	4	3	3	2
533	TRUE	Empty	3-beta-hydroxysteroid-Delta(8),Delta(7)-isomerase OS=Homo sapiens OX=9606 GN=EBP PE=1 SV=3	EBP_HUMAN		26 kDa		unknown	3	4	3	4
534	TRUE	Empty	Stromal cell-derived factor 2-like protein 1 OS=Homo sapiens OX=9606 GN=SDF2L1 PE=1 SV=2	SDF2L_HUMAN		24 kDa		unknown	1	4	4	5
535	TRUE	Empty	Cluster of Isoform 2 of V-type proton ATPase 116 kDa subunit a isoform 1 OS=Homo sapiens OX=9606 GN=ATP6V0A1 (sp|Q93050-1|VPP1_HUMAN)	sp|Q93050-1|VPP1_HUMAN [4]		96 kDa	TRUE	unknown	4	5	4	2
535.1	TRUE	Empty	Isoform 2 of V-type proton ATPase 116 kDa subunit a isoform 1 OS=Homo sapiens OX=9606 GN=ATP6V0A1	sp|Q93050-1|VPP1_HUMAN (+2)		96 kDa	TRUE	unknown	4	5	4	2
535.2	TRUE	Empty	V-type proton ATPase subunit a OS=Homo sapiens OX=9606 GN=ATP6V0A1 PE=1 SV=1	F5H1T6_HUMAN		55 kDa	TRUE	unknown	0	0	0	0
536	TRUE	Empty	Cluster of Isoform Non-brain of Clathrin light chain A OS=Homo sapiens OX=9606 GN=CLTA (sp|P09496-2|CLCA_HUMAN)	sp|P09496-2|CLCA_HUMAN [2]		24 kDa	TRUE	unknown	4	2	1	2
536.1	TRUE	Empty	Isoform Non-brain of Clathrin light chain A OS=Homo sapiens OX=9606 GN=CLTA	sp|P09496-2|CLCA_HUMAN		24 kDa	TRUE	unknown	4	2	1	2
536.2	TRUE	Empty	Clathrin light chain OS=Homo sapiens OX=9606 GN=CLTA PE=1 SV=1	F8WF69_HUMAN		28 kDa	TRUE	unknown	0	0	0	0
537	TRUE	Empty	Cluster of Flotillin-2 OS=Homo sapiens OX=9606 GN=FLOT2 PE=1 SV=1 (E7EMK3_HUMAN)	E7EMK3_HUMAN [4]		53 kDa	TRUE	unknown	1	3	4	3
537.1	TRUE	Empty	Flotillin-2 OS=Homo sapiens OX=9606 GN=FLOT2 PE=1 SV=1	E7EMK3_HUMAN (+2)		53 kDa	TRUE	unknown	1	3	4	3
537.2	TRUE	Empty	Flotillin-2 (Fragment) OS=Homo sapiens OX=9606 GN=FLOT2 PE=1 SV=1	K7EKW9_HUMAN		28 kDa	TRUE	unknown	0	0	0	0
538	TRUE	Empty	Cluster of ADP-ribosylation factor-like protein 8B OS=Homo sapiens OX=9606 GN=ARL8B PE=1 SV=1 (sp|Q9NVJ2|ARL8B_HUMAN)	sp|Q9NVJ2|ARL8B_HUMAN [2]		22 kDa	TRUE	unknown	2	3	3	5
538.1	TRUE	Empty	ADP-ribosylation factor-like protein 8B OS=Homo sapiens OX=9606 GN=ARL8B PE=1 SV=1	sp|Q9NVJ2|ARL8B_HUMAN		22 kDa	TRUE	unknown	2	3	3	5
538.2	TRUE	Empty	ADP-ribosylation factor-like protein 8A OS=Homo sapiens OX=9606 GN=ARL8A PE=1 SV=1	ARL8A_HUMAN		21 kDa	TRUE	unknown	0	0	0	0
539	TRUE	Empty	Cluster of Vacuolar protein sorting-associated protein 45 OS=Homo sapiens OX=9606 GN=VPS45 PE=1 SV=1 (A0A087WU65_HUMAN)	A0A087WU65_HUMAN [2]		51 kDa	TRUE	unknown	6	5	0	0
539.1	TRUE	Empty	Vacuolar protein sorting-associated protein 45 OS=Homo sapiens OX=9606 GN=VPS45 PE=1 SV=1	A0A087WU65_HUMAN		51 kDa	TRUE	unknown	6	5	0	0
539.2	TRUE	Empty	Isoform 2 of Vacuolar protein sorting-associated protein 45 OS=Homo sapiens OX=9606 GN=VPS45	sp|Q9NRW7-2|VPS45_HUMAN		62 kDa	TRUE	unknown	0	0	0	0
540	TRUE	Empty	Cluster of Poly(U)-binding-splicing factor PUF60 (Fragment) OS=Homo sapiens OX=9606 GN=PUF60 PE=1 SV=1 (A0A0J9YXJ8_HUMAN)	A0A0J9YXJ8_HUMAN [6]		56 kDa	TRUE	unknown	0	0	8	5
540.1	TRUE	Empty	Poly(U)-binding-splicing factor PUF60 (Fragment) OS=Homo sapiens OX=9606 GN=PUF60 PE=1 SV=1	A0A0J9YXJ8_HUMAN (+4)		56 kDa	TRUE	unknown	0	0	7	5
540.2	TRUE	Empty	Poly(U)-binding-splicing factor PUF60 (Fragment) OS=Homo sapiens OX=9606 GN=PUF60 PE=1 SV=1	H0YCP8_HUMAN		28 kDa	TRUE	unknown	0	0	3	0
541	TRUE	Empty	RNA-binding protein EWS OS=Homo sapiens OX=9606 GN=EWSR1 PE=1 SV=1	A0A0D9SFL3_HUMAN (+7)		61 kDa		unknown	2	3	3	5
542	TRUE	Empty	Ras-related protein Rap-1b (Fragment) OS=Homo sapiens OX=9606 GN=RAP1B PE=1 SV=8	F5GZG1_HUMAN		14 kDa	TRUE	unknown	4	7	5	5
543	TRUE	Empty	RNA-binding protein 39 (Fragment) OS=Homo sapiens OX=9606 GN=RBM39 PE=1 SV=8	H0Y4X3_HUMAN		37 kDa		unknown	0	0	7	5
544	TRUE	Empty	Golgin subfamily A member 4 (Fragment) OS=Homo sapiens OX=9606 GN=GOLGA4 PE=1 SV=1	H0Y6I0_HUMAN (+4)		247 kDa		unknown	3	7	0	0
545	TRUE	Empty	Beta-hexosaminidase subunit beta OS=Homo sapiens OX=9606 GN=HEXB PE=1 SV=3	HEXB_HUMAN (+1)		63 kDa		unknown	3	3	4	4
546	TRUE	Empty	Ras-related protein Rab-22A OS=Homo sapiens OX=9606 GN=RAB22A PE=1 SV=2	RB22A_HUMAN		22 kDa		unknown	5	4	1	1
547	TRUE	Empty	60S ribosomal protein L35a OS=Homo sapiens OX=9606 GN=RPL35A PE=1 SV=2	RL35A_HUMAN		13 kDa		unknown	0	1	2	3
548	TRUE	Empty	40S ribosomal protein S19 OS=Homo sapiens OX=9606 GN=RPS19 PE=1 SV=2	RS19_HUMAN		16 kDa		unknown	4	4	3	3
549	TRUE	Empty	Isoform TGN46 of Trans-Golgi network integral membrane protein 2 OS=Homo sapiens OX=9606 GN=TGOLN2	sp|O43493-2|TGON2_HUMAN (+3)		46 kDa		unknown	4	4	3	2
550	TRUE	Empty	U5 small nuclear ribonucleoprotein 200 kDa helicase OS=Homo sapiens OX=9606 GN=SNRNP200 PE=1 SV=2	sp|O75643|U520_HUMAN		245 kDa		unknown	1	1	5	3
551	TRUE	Empty	Mannosyl-oligosaccharide glucosidase OS=Homo sapiens OX=9606 GN=MOGS PE=1 SV=5	sp|Q13724|MOGS_HUMAN		92 kDa		unknown	1	4	1	2
552	TRUE	Empty	Splicing factor 3B subunit 3 OS=Homo sapiens OX=9606 GN=SF3B3 PE=1 SV=4	sp|Q15393|SF3B3_HUMAN		136 kDa		unknown	0	0	5	6
553	TRUE	Empty	Isoform 4 of Protein PAT1 homolog 1 OS=Homo sapiens OX=9606 GN=PATL1	sp|Q86TB9-4|PATL1_HUMAN (+1)		80 kDa		unknown	2	3	6	0
554	TRUE	Empty	Isoform 2 of Adenosine 3'-phospho 5'-phosphosulfate transporter 1 OS=Homo sapiens OX=9606 GN=SLC35B2	sp|Q8TB61-2|S35B2_HUMAN (+2)		43 kDa		unknown	3	4	2	3
555	TRUE	Empty	A-kinase anchor protein 1, mitochondrial OS=Homo sapiens OX=9606 GN=AKAP1 PE=1 SV=1	sp|Q92667|AKAP1_HUMAN		97 kDa		unknown	2	5	5	0
556	TRUE	Empty	Isoform 2 of Lysophospholipid acyltransferase 7 OS=Homo sapiens OX=9606 GN=MBOAT7	sp|Q96N66-2|MBOA7_HUMAN (+1)		45 kDa		unknown	3	4	3	3
557	TRUE	Empty	Sodium-coupled neutral amino acid transporter 2 OS=Homo sapiens OX=9606 GN=SLC38A2 PE=1 SV=2	sp|Q96QD8|S38A2_HUMAN		56 kDa		unknown	3	4	4	3
558	TRUE	Empty	Coagulation factor V OS=Homo sapiens OX=9606 GN=F5 PE=1 SV=1	A0A0A0MRJ7_HUMAN (+1)		252 kDa		unknown	2	2	2	2
559	TRUE	Empty	Isoform 2 of Ras-related protein Ral-B OS=Homo sapiens OX=9606 GN=RALB	sp|P11234-2|RALB_HUMAN (+2)		26 kDa	TRUE	unknown	3	3	3	4
560	TRUE	Empty	40S ribosomal protein S10 OS=Homo sapiens OX=9606 GN=RPS10 PE=1 SV=1	RS10_HUMAN		19 kDa		unknown	1	3	2	3
561	TRUE	Empty	Myeloid-derived growth factor OS=Homo sapiens OX=9606 GN=MYDGF PE=1 SV=1	MYDGF_HUMAN		19 kDa		unknown	4	4	3	3
562	TRUE	Empty	Cluster of Golgin subfamily A member 5 OS=Homo sapiens OX=9606 GN=GOLGA5 PE=1 SV=3 (sp|Q8TBA6|GOGA5_HUMAN)	sp|Q8TBA6|GOGA5_HUMAN [2]		83 kDa	TRUE	unknown	4	4	2	1
562.1	TRUE	Empty	Golgin subfamily A member 5 OS=Homo sapiens OX=9606 GN=GOLGA5 PE=1 SV=3	sp|Q8TBA6|GOGA5_HUMAN		83 kDa	TRUE	unknown	4	4	2	1
562.2	TRUE	Empty	Golgin subfamily A member 5 (Fragment) OS=Homo sapiens OX=9606 GN=GOLGA5 PE=1 SV=1	H0YK03_HUMAN		13 kDa	TRUE	unknown	0	0	0	0
563	TRUE	Empty	Cluster of Isoform 2 of T-complex protein 1 subunit theta OS=Homo sapiens OX=9606 GN=CCT8 (sp|P50990-2|TCPQ_HUMAN)	sp|P50990-2|TCPQ_HUMAN [3]		58 kDa	TRUE	unknown	3	2	1	3
563.1	TRUE	Empty	Isoform 2 of T-complex protein 1 subunit theta OS=Homo sapiens OX=9606 GN=CCT8	sp|P50990-2|TCPQ_HUMAN (+1)		58 kDa	TRUE	unknown	3	2	1	3
563.2	TRUE	Empty	T-complex protein 1 subunit theta (Fragment) OS=Homo sapiens OX=9606 GN=CCT8 PE=1 SV=1	H7C4C8_HUMAN		35 kDa	TRUE	unknown	0	1	0	0
564	TRUE	Empty	Cluster of Catenin delta-1 OS=Homo sapiens OX=9606 GN=CTNND1 PE=1 SV=2 (C9JZR2_HUMAN)	C9JZR2_HUMAN [25]		105 kDa	TRUE	unknown	1	3	1	4
564.1	TRUE	Empty	Catenin delta-1 OS=Homo sapiens OX=9606 GN=CTNND1 PE=1 SV=2	C9JZR2_HUMAN (+12)		105 kDa	TRUE	unknown	1	3	1	4
564.2	TRUE	Empty	Isoform 2BC of Catenin delta-1 OS=Homo sapiens OX=9606 GN=CTNND1	sp|O60716-12|CTND1_HUMAN (+11)		100 kDa	TRUE	unknown	0	0	0	0
565	TRUE	Empty	Signal peptidase complex subunit 2 OS=Homo sapiens OX=9606 GN=SPCS2 PE=1 SV=1	A0A087WUC6_HUMAN (+2)		25 kDa		unknown	4	4	1	3
566	TRUE	Empty	Actin-related protein 3 OS=Homo sapiens OX=9606 GN=ACTR3 PE=1 SV=3	ARP3_HUMAN		47 kDa		unknown	3	4	1	2
567	TRUE	Empty	Calcium-transporting ATPase OS=Homo sapiens OX=9606 GN=ATP2C1 PE=1 SV=1	B4E2Q0_HUMAN (+10)		105 kDa		unknown	4	6	0	3
568	TRUE	Empty	Protein CASC3 OS=Homo sapiens OX=9606 GN=CASC3 PE=1 SV=2	CASC3_HUMAN		76 kDa		unknown	0	0	6	6
569	TRUE	Empty	Cytochrome c oxidase subunit 4 isoform 1, mitochondrial OS=Homo sapiens OX=9606 GN=COX4I1 PE=1 SV=1	COX41_HUMAN		20 kDa		unknown	2	4	2	4
570	TRUE	Empty	Pre-mRNA-splicing factor ATP-dependent RNA helicase DHX15 OS=Homo sapiens OX=9606 GN=DHX15 PE=1 SV=2	DHX15_HUMAN		91 kDa		unknown	0	0	7	4
571	TRUE	Empty	Peptidyl-prolyl cis-trans isomerase G OS=Homo sapiens OX=9606 GN=PPIG PE=1 SV=1	E9PG73_HUMAN (+1)		87 kDa		unknown	1	1	4	5
572	TRUE	Empty	Crossover junction endonuclease MUS81 OS=Homo sapiens OX=9606 GN=MUS81 PE=1 SV=1	E9PRI1_HUMAN (+2)		52 kDa		unknown	2	1	6	3
573	TRUE	Empty	FAS-associated factor 2 OS=Homo sapiens OX=9606 GN=FAF2 PE=1 SV=2	FAF2_HUMAN		53 kDa		unknown	0	6	3	2
574	TRUE	Empty	Fragile X mental retardation syndrome-related protein 2 OS=Homo sapiens OX=9606 GN=FXR2 PE=1 SV=2	FXR2_HUMAN		74 kDa	TRUE	unknown	4	4	5	3
575	TRUE	Empty	Annexin (Fragment) OS=Homo sapiens OX=9606 GN=ANXA2 PE=1 SV=1	H0YMD0_HUMAN (+3)		25 kDa		unknown	2	3	1	1
576	TRUE	Empty	Uncharacterized protein (Fragment) OS=Homo sapiens OX=9606 PE=4 SV=2	H3BN98_HUMAN		27 kDa		unknown	1	4	3	4
577	TRUE	Empty	Myosin regulatory light chain 12A OS=Homo sapiens OX=9606 GN=MYL12A PE=1 SV=1	J3QRS3_HUMAN (+2)		20 kDa		unknown	4	4	2	2
578	TRUE	Empty	Leucine-rich PPR motif-containing protein, mitochondrial OS=Homo sapiens OX=9606 GN=LRPPRC PE=1 SV=3	LPPRC_HUMAN		158 kDa		unknown	1	2	1	4
579	TRUE	Empty	60S ribosomal protein L14 OS=Homo sapiens OX=9606 GN=RPL14 PE=1 SV=4	RL14_HUMAN		23 kDa		unknown	2	2	6	2
580	TRUE	Empty	T-complex protein 1 subunit alpha OS=Homo sapiens OX=9606 GN=TCP1 PE=1 SV=1	TCPA_HUMAN		60 kDa		unknown	3	2	6	2
581	TRUE	Empty	Tumor necrosis factor alpha-induced protein 2 OS=Homo sapiens OX=9606 GN=TNFAIP2 PE=2 SV=2	TNAP2_HUMAN		73 kDa		unknown	3	6	2	0
582	TRUE	Empty	Mitochondrial import receptor subunit TOM70 OS=Homo sapiens OX=9606 GN=TOMM70 PE=1 SV=1	TOM70_HUMAN		67 kDa		unknown	0	0	2	3
583	TRUE	Empty	Integrin beta-1 OS=Homo sapiens OX=9606 GN=ITGB1 PE=1 SV=2	sp|P05556|ITB1_HUMAN		88 kDa		unknown	2	4	4	3
584	TRUE	Empty	Isoform 2 of Ras-related protein Rab-5A OS=Homo sapiens OX=9606 GN=RAB5A	sp|P20339-2|RAB5A_HUMAN (+1)		22 kDa	TRUE	unknown	4	9	4	5
585	TRUE	Empty	Isoform 1 of Dual specificity protein kinase CLK3 OS=Homo sapiens OX=9606 GN=CLK3	sp|P49761-1|CLK3_HUMAN		59 kDa		unknown	1	0	5	4
586	TRUE	Empty	T-complex protein 1 subunit delta OS=Homo sapiens OX=9606 GN=CCT4 PE=1 SV=4	sp|P50991|TCPD_HUMAN		58 kDa		unknown	1	4	4	1
587	TRUE	Empty	Receptor expression-enhancing protein 5 OS=Homo sapiens OX=9606 GN=REEP5 PE=1 SV=3	sp|Q00765|REEP5_HUMAN		21 kDa		unknown	2	4	3	3
588	TRUE	Empty	Isoform 2 of Reticulocalbin-2 OS=Homo sapiens OX=9606 GN=RCN2	sp|Q14257-2|RCN2_HUMAN (+1)		39 kDa		unknown	4	6	2	1
589	TRUE	Empty	Retinol dehydrogenase 11 OS=Homo sapiens OX=9606 GN=RDH11 PE=1 SV=2	sp|Q8TC12|RDH11_HUMAN		35 kDa		unknown	2	4	3	3
590	TRUE	Empty	Nuclear pore membrane glycoprotein 210 OS=Homo sapiens OX=9606 GN=NUP210 PE=1 SV=3	sp|Q8TEM1|PO210_HUMAN		205 kDa		unknown	5	3	1	0
591	TRUE	Empty	Isoform 3 of Ubiquitin carboxyl-terminal hydrolase 7 OS=Homo sapiens OX=9606 GN=USP7	sp|Q93009-3|UBP7_HUMAN (+1)		126 kDa		unknown	3	3	1	2
592	TRUE	Empty	Isoform 2 of Ribonuclease 3 OS=Homo sapiens OX=9606 GN=DROSHA	sp|Q9NRR4-2|RNC_HUMAN (+2)		151 kDa		unknown	0	0	6	5
593	TRUE	Empty	Isoform 2 of Xenotropic and polytropic retrovirus receptor 1 OS=Homo sapiens OX=9606 GN=XPR1	sp|Q9UBH6-2|XPR1_HUMAN (+1)		74 kDa		unknown	1	4	1	2
594	TRUE	Empty	Calcineurin B homologous protein 1 OS=Homo sapiens OX=9606 GN=CHP1 PE=1 SV=3	CHP1_HUMAN		22 kDa		unknown	3	3	3	3
595	TRUE	Empty	40S ribosomal protein S16 OS=Homo sapiens OX=9606 GN=RPS16 PE=1 SV=2	RS16_HUMAN		16 kDa		unknown	2	2	3	2
596	TRUE	Empty	Isoform 4 of Inhibitor of nuclear factor kappa-B kinase-interacting protein OS=Homo sapiens OX=9606 GN=IKBIP	sp|Q70UQ0-4|IKIP_HUMAN		43 kDa	TRUE	unknown	2	3	3	3
597	TRUE	Empty	S-phase kinase-associated protein 1 OS=Homo sapiens OX=9606 GN=SKP1 PE=1 SV=1	E5RJR5_HUMAN (+1)		19 kDa		unknown	2	1	2	2
598	TRUE	Empty	Cluster of GTP-binding protein SAR1b OS=Homo sapiens OX=9606 GN=SAR1B PE=1 SV=1 (SAR1B_HUMAN)	SAR1B_HUMAN [2]		22 kDa	TRUE	unknown	2	4	3	3
598.1	TRUE	Empty	GTP-binding protein SAR1b OS=Homo sapiens OX=9606 GN=SAR1B PE=1 SV=1	SAR1B_HUMAN		22 kDa	TRUE	unknown	2	4	3	2
598.2	TRUE	Empty	GTP-binding protein SAR1a OS=Homo sapiens OX=9606 GN=SAR1A PE=1 SV=1	sp|Q9NR31|SAR1A_HUMAN		22 kDa	TRUE	unknown	1	2	1	2
599	TRUE	Empty	Zinc transporter SLC39A7 OS=Homo sapiens OX=9606 GN=SLC39A7 PE=1 SV=2	S39A7_HUMAN		50 kDa		unknown	3	3	2	4
600	TRUE	Empty	Cluster of Chromosome 15 open reading frame 23, isoform CRA_d OS=Homo sapiens OX=9606 GN=KNSTRN PE=1 SV=1 (V9GY01_HUMAN)	V9GY01_HUMAN [4]		27 kDa	TRUE	unknown	3	4	3	2
600.1	TRUE	Empty	Chromosome 15 open reading frame 23, isoform CRA_d OS=Homo sapiens OX=9606 GN=KNSTRN PE=1 SV=1	V9GY01_HUMAN (+2)		27 kDa	TRUE	unknown	3	4	3	2
600.2	TRUE	Empty	Small kinetochore-associated protein (Fragment) OS=Homo sapiens OX=9606 GN=KNSTRN PE=1 SV=1	H0YM11_HUMAN		24 kDa	TRUE	unknown	0	0	0	0
601	TRUE	Empty	Cluster of Glycosylphosphatidylinositol anchor attachment 1 protein OS=Homo sapiens OX=9606 GN=GPAA1 PE=1 SV=1 (E9PLV6_HUMAN)	E9PLV6_HUMAN [3]		26 kDa	TRUE	unknown	3	4	0	0
601.1	TRUE	Empty	Glycosylphosphatidylinositol anchor attachment 1 protein OS=Homo sapiens OX=9606 GN=GPAA1 PE=1 SV=1	E9PLV6_HUMAN		26 kDa	TRUE	unknown	2	2	0	0
601.2	TRUE	Empty	Glycosylphosphatidylinositol anchor attachment 1 protein OS=Homo sapiens OX=9606 GN=GPAA1 PE=1 SV=3	sp|O43292|GPAA1_HUMAN		68 kDa	TRUE	unknown	3	4	0	0
601.3	TRUE	Empty	Glycosylphosphatidylinositol anchor attachment 1 protein (Fragment) OS=Homo sapiens OX=9606 GN=GPAA1 PE=1 SV=2	E9PQ31_HUMAN		30 kDa	TRUE	unknown	2	1	0	0
602	TRUE	Empty	Non-specific serine/threonine protein kinase OS=Homo sapiens OX=9606 GN=CDC42BPA PE=1 SV=1	A0A0A0MRJ0_HUMAN (+5)		194 kDa	TRUE	unknown	2	9	1	0
603	TRUE	Empty	Polypyrimidine tract-binding protein 1 OS=Homo sapiens OX=9606 GN=PTBP1 PE=1 SV=1	A0A0U1RRM4_HUMAN (+4)		62 kDa	TRUE	unknown	0	1	5	4
604	TRUE	Empty	Syntenin-1 OS=Homo sapiens OX=9606 GN=SDCBP PE=1 SV=1	B4DHN5_HUMAN (+4)		26 kDa		unknown	0	3	2	2
605	TRUE	Empty	Fragile X mental retardation syndrome-related protein 1 OS=Homo sapiens OX=9606 GN=FXR1 PE=1 SV=1	B4DXZ6_HUMAN (+2)		68 kDa	TRUE	unknown	3	5	3	4
606	TRUE	Empty	Prosaposin OS=Homo sapiens OX=9606 GN=PSAP PE=1 SV=2	C9JIZ6_HUMAN (+2)		58 kDa		unknown	4	2	3	2
607	TRUE	Empty	F-actin-capping protein subunit alpha-1 OS=Homo sapiens OX=9606 GN=CAPZA1 PE=1 SV=3	CAZA1_HUMAN		33 kDa	TRUE	unknown	4	3	1	2
608	TRUE	Empty	Protein transport protein Sec31A OS=Homo sapiens OX=9606 GN=SEC31A PE=1 SV=1	D6REX3_HUMAN (+8)		136 kDa	TRUE	unknown	1	5	3	1
609	TRUE	Empty	Dolichyl-diphosphooligosaccharide--protein glycosyltransferase subunit DAD1 OS=Homo sapiens OX=9606 GN=DAD1 PE=1 SV=3	DAD1_HUMAN (+1)		12 kDa		unknown	1	3	2	3
610	TRUE	Empty	Eukaryotic translation initiation factor 3 subunit E OS=Homo sapiens OX=9606 GN=EIF3E PE=1 SV=1	EIF3E_HUMAN		52 kDa		unknown	3	1	4	2
611	TRUE	Empty	CAAX prenyl protease 1 homolog OS=Homo sapiens OX=9606 GN=ZMPSTE24 PE=1 SV=2	FACE1_HUMAN		55 kDa		unknown	3	3	2	2
612	TRUE	Empty	Reticulophagy regulator 3 OS=Homo sapiens OX=9606 GN=RETREG3 PE=1 SV=1	K7EQI9_HUMAN (+1)		41 kDa		unknown	2	4	3	1
613	TRUE	Empty	Alkaline phosphatase, placental type OS=Homo sapiens OX=9606 GN=ALPP PE=1 SV=2	PPB1_HUMAN		58 kDa		unknown	6	5	1	0
614	TRUE	Empty	Profilin-1 OS=Homo sapiens OX=9606 GN=PFN1 PE=1 SV=2	PROF1_HUMAN		15 kDa		unknown	1	3	4	1
615	TRUE	Empty	Pre-mRNA-processing-splicing factor 8 OS=Homo sapiens OX=9606 GN=PRPF8 PE=1 SV=2	PRP8_HUMAN		274 kDa		unknown	0	0	4	4
616	TRUE	Empty	40S ribosomal protein S25 OS=Homo sapiens OX=9606 GN=RPS25 PE=1 SV=1	RS25_HUMAN		14 kDa		unknown	2	3	2	2
617	TRUE	Empty	UBX domain-containing protein 4 OS=Homo sapiens OX=9606 GN=UBXN4 PE=1 SV=2	UBXN4_HUMAN		57 kDa		unknown	2	5	1	3
618	TRUE	Empty	X-ray repair cross-complementing protein 5 OS=Homo sapiens OX=9606 GN=XRCC5 PE=1 SV=3	XRCC5_HUMAN		83 kDa		unknown	2	3	3	3
619	TRUE	Empty	T-complex protein 1 subunit zeta OS=Homo sapiens OX=9606 GN=CCT6A PE=1 SV=3	sp|P40227|TCPZ_HUMAN		58 kDa	TRUE	unknown	1	3	3	1
620	TRUE	Empty	60S ribosomal protein L15 OS=Homo sapiens OX=9606 GN=RPL15 PE=1 SV=2	sp|P61313|RL15_HUMAN		24 kDa		unknown	0	4	4	3
621	TRUE	Empty	Isoform 2 of Cdc42 effector protein 1 OS=Homo sapiens OX=9606 GN=CDC42EP1	sp|Q00587-2|BORG5_HUMAN (+1)		40 kDa		unknown	3	4	3	1
622	TRUE	Empty	Transcription intermediary factor 1-beta OS=Homo sapiens OX=9606 GN=TRIM28 PE=1 SV=5	sp|Q13263|TIF1B_HUMAN		89 kDa		unknown	0	4	4	3
623	TRUE	Empty	Threonylcarbamoyladenosine tRNA methylthiotransferase OS=Homo sapiens OX=9606 GN=CDKAL1 PE=1 SV=1	sp|Q5VV42|CDKAL_HUMAN		65 kDa		unknown	4	4	3	1
624	TRUE	Empty	Phosphatidylinositide phosphatase SAC1 OS=Homo sapiens OX=9606 GN=SACM1L PE=1 SV=2	sp|Q9NTJ5|SAC1_HUMAN		67 kDa		unknown	3	5	1	0
625	TRUE	Empty	Isoform 4 of Signal recognition particle subunit SRP68 OS=Homo sapiens OX=9606 GN=SRP68	sp|Q9UHB9-4|SRP68_HUMAN (+1)		66 kDa		unknown	3	3	4	2
626	TRUE	Empty	Complement component 1 Q subcomponent-binding protein, mitochondrial OS=Homo sapiens OX=9606 GN=C1QBP PE=1 SV=1	C1QBP_HUMAN		31 kDa		unknown	3	2	3	4
627	TRUE	Empty	Isoform 2 of Aminoacyl tRNA synthase complex-interacting multifunctional protein 1 OS=Homo sapiens OX=9606 GN=AIMP1	sp|Q12904-2|AIMP1_HUMAN (+1)		37 kDa		unknown	2	3	3	3
628	TRUE	Empty	Ubiquitin-associated domain-containing protein 2 OS=Homo sapiens OX=9606 GN=UBAC2 PE=1 SV=1	sp|Q8NBM4|UBAC2_HUMAN		39 kDa		unknown	2	2	1	1
629	TRUE	Empty	Isoform 2 of Triosephosphate isomerase OS=Homo sapiens OX=9606 GN=TPI1	sp|P60174-1|TPIS_HUMAN (+2)		27 kDa		unknown	1	2	3	2
630	TRUE	Empty	Isoform 2 of Elongation factor 1-gamma OS=Homo sapiens OX=9606 GN=EEF1G	sp|P26641-2|EF1G_HUMAN (+1)		56 kDa		unknown	2	3	1	2
631	TRUE	Empty	Cluster of Isoform 4 of Ras-related protein R-Ras2 OS=Homo sapiens OX=9606 GN=RRAS2 (sp|P62070-4|RRAS2_HUMAN)	sp|P62070-4|RRAS2_HUMAN [4]		24 kDa	TRUE	unknown	2	4	2	3
631.1	TRUE	Empty	Isoform 4 of Ras-related protein R-Ras2 OS=Homo sapiens OX=9606 GN=RRAS2	sp|P62070-4|RRAS2_HUMAN (+1)		24 kDa	TRUE	unknown	1	4	2	3
631.2	TRUE	Empty	Ras-related protein R-Ras OS=Homo sapiens OX=9606 GN=RRAS PE=1 SV=1	RRAS_HUMAN		23 kDa	TRUE	unknown	2	0	0	0
631.3	TRUE	Empty	Ras-related protein R-Ras2 (Fragment) OS=Homo sapiens OX=9606 GN=RRAS2 PE=1 SV=1	E9PQ87_HUMAN		8 kDa	TRUE	unknown	0	0	0	0
632	TRUE	Empty	60S ribosomal protein L31 OS=Homo sapiens OX=9606 GN=RPL31 PE=1 SV=1	B7Z4C8_HUMAN (+7)		15 kDa		unknown	3	2	3	1
633	TRUE	Empty	Cluster of Isoform B of Plasma membrane calcium-transporting ATPase 1 OS=Homo sapiens OX=9606 GN=ATP2B1 (sp|P20020-3|AT2B1_HUMAN)	sp|P20020-3|AT2B1_HUMAN [14]		135 kDa	TRUE	unknown	2	2	2	2
633.1	TRUE	Empty	Isoform B of Plasma membrane calcium-transporting ATPase 1 OS=Homo sapiens OX=9606 GN=ATP2B1	sp|P20020-3|AT2B1_HUMAN (+1)		135 kDa	TRUE	unknown	2	2	2	2
633.2	TRUE	Empty	Isoform XB of Plasma membrane calcium-transporting ATPase 4 OS=Homo sapiens OX=9606 GN=ATP2B4	sp|P23634-6|AT2B4_HUMAN (+3)		134 kDa	TRUE	unknown	0	0	0	0
633.3	TRUE	Empty	Isoform XA of Plasma membrane calcium-transporting ATPase 3 OS=Homo sapiens OX=9606 GN=ATP2B3	sp|Q16720-2|AT2B3_HUMAN (+7)		129 kDa	TRUE	unknown	0	0	0	0
634	TRUE	Empty	Endoplasmic reticulum resident protein 44 OS=Homo sapiens OX=9606 GN=ERP44 PE=1 SV=1	ERP44_HUMAN		47 kDa		unknown	2	3	2	2
635	TRUE	Empty	Cluster of Isoform 2B of GTPase KRas OS=Homo sapiens OX=9606 GN=KRAS (sp|P01116-2|RASK_HUMAN)	sp|P01116-2|RASK_HUMAN [2]		21 kDa	TRUE	unknown	3	4	3	1
635.1	TRUE	Empty	Isoform 2B of GTPase KRas OS=Homo sapiens OX=9606 GN=KRAS	sp|P01116-2|RASK_HUMAN		21 kDa	TRUE	unknown	2	3	2	1
635.2	TRUE	Empty	GTPase NRas OS=Homo sapiens OX=9606 GN=NRAS PE=1 SV=1	RASN_HUMAN		21 kDa	TRUE	unknown	2	2	2	0
636	TRUE	Empty	Cluster of 26S proteasome regulatory subunit 4 OS=Homo sapiens OX=9606 GN=PSMC1 PE=1 SV=1 (sp|P62191|PRS4_HUMAN)	sp|P62191|PRS4_HUMAN [2]		49 kDa	TRUE	unknown	3	3	2	0
636.1	TRUE	Empty	26S proteasome regulatory subunit 4 OS=Homo sapiens OX=9606 GN=PSMC1 PE=1 SV=1	sp|P62191|PRS4_HUMAN		49 kDa	TRUE	unknown	3	3	2	0
636.2	TRUE	Empty	Isoform 2 of 26S proteasome regulatory subunit 4 OS=Homo sapiens OX=9606 GN=PSMC1	sp|P62191-2|PRS4_HUMAN		41 kDa	TRUE	unknown	3	2	2	0
637	TRUE	Empty	Cluster of DNA polymerase delta catalytic subunit OS=Homo sapiens OX=9606 GN=POLD1 PE=1 SV=2 (DPOD1_HUMAN)	DPOD1_HUMAN [3]		124 kDa	TRUE	unknown	2	3	4	0
637.1	TRUE	Empty	DNA polymerase delta catalytic subunit OS=Homo sapiens OX=9606 GN=POLD1 PE=1 SV=2	DPOD1_HUMAN (+1)		124 kDa	TRUE	unknown	2	3	4	0
637.2	TRUE	Empty	Uncharacterized protein (Fragment) OS=Homo sapiens OX=9606 PE=3 SV=1	M0R3H8_HUMAN		44 kDa	TRUE	unknown	0	0	0	0
638	TRUE	Empty	Cluster of Septin-2 OS=Homo sapiens OX=9606 GN=SEPT2 PE=1 SV=1 (B5MCX3_HUMAN)	B5MCX3_HUMAN [4]		37 kDa	TRUE	unknown	4	8	0	0
638.1	TRUE	Empty	Septin-2 OS=Homo sapiens OX=9606 GN=SEPT2 PE=1 SV=1	B5MCX3_HUMAN		37 kDa	TRUE	unknown	4	7	0	0
638.2	TRUE	Empty	Isoform 2 of Septin-2 OS=Homo sapiens OX=9606 GN=SEPT2	sp|Q15019-2|SEPT2_HUMAN (+2)		45 kDa	TRUE	unknown	3	7	0	0
639	TRUE	Empty	Glucosylceramidase OS=Homo sapiens OX=9606 GN=GBA PE=1 SV=1	A0A0G2JLB3_HUMAN (+4)		60 kDa		unknown	3	5	1	2
640	TRUE	Empty	GTP-binding nuclear protein Ran OS=Homo sapiens OX=9606 GN=RAN PE=1 SV=1	B5MDF5_HUMAN (+2)		26 kDa		unknown	1	3	3	2
641	TRUE	Empty	Calcium homeostasis endoplasmic reticulum protein OS=Homo sapiens OX=9606 GN=CHERP PE=1 SV=3	CHERP_HUMAN (+1)		104 kDa		unknown	0	0	3	3
642	TRUE	Empty	Dolichol-phosphate mannosyltransferase subunit 1 OS=Homo sapiens OX=9606 GN=DPM1 PE=1 SV=1	DPM1_HUMAN (+2)		30 kDa		unknown	1	3	1	2
643	TRUE	Empty	Methyltransferase-like protein 7A (Fragment) OS=Homo sapiens OX=9606 GN=METTL7A PE=1 SV=1	F8VQX6_HUMAN (+2)		21 kDa		unknown	2	3	3	2
644	TRUE	Empty	Girdin (Fragment) OS=Homo sapiens OX=9606 GN=CCDC88A PE=1 SV=1	H7C2C6_HUMAN		137 kDa		unknown	2	4	2	2
645	TRUE	Empty	Cisplatin resistance-associated overexpressed protein, isoform CRA_b OS=Homo sapiens OX=9606 GN=LUC7L3 PE=1 SV=1	J3KPP4_HUMAN (+1)		58 kDa		unknown	1	1	4	2
646	TRUE	Empty	NPC intracellular cholesterol transporter 1 (Fragment) OS=Homo sapiens OX=9606 GN=NPC1 PE=1 SV=1	K7EQ23_HUMAN (+2)		108 kDa		unknown	2	2	3	3
647	TRUE	Empty	Galectin-3-binding protein OS=Homo sapiens OX=9606 GN=LGALS3BP PE=1 SV=1	LG3BP_HUMAN		65 kDa		unknown	3	3	2	2
648	TRUE	Empty	Protein mago nashi homolog 2 OS=Homo sapiens OX=9606 GN=MAGOHB PE=1 SV=1	MGN2_HUMAN (+1)		17 kDa		unknown	0	0	4	6
649	TRUE	Empty	Phosphatidylinositol 4-kinase type 2-beta OS=Homo sapiens OX=9606 GN=PI4K2B PE=1 SV=1	P4K2B_HUMAN		55 kDa		unknown	2	1	3	3
650	TRUE	Empty	Cytochrome b-c1 complex subunit 1, mitochondrial OS=Homo sapiens OX=9606 GN=UQCRC1 PE=1 SV=3	QCR1_HUMAN		53 kDa		unknown	2	4	1	3
651	TRUE	Empty	Protein transport protein Sec61 subunit beta OS=Homo sapiens OX=9606 GN=SEC61B PE=1 SV=2	SC61B_HUMAN		10 kDa		unknown	2	4	1	3
652	TRUE	Empty	Sideroflexin-1 OS=Homo sapiens OX=9606 GN=SFXN1 PE=1 SV=4	SFXN1_HUMAN		36 kDa		unknown	2	3	3	2
653	TRUE	Empty	Serine palmitoyltransferase 2 OS=Homo sapiens OX=9606 GN=SPTLC2 PE=1 SV=1	SPTC2_HUMAN		63 kDa		unknown	3	2	0	2
654	TRUE	Empty	5'-nucleotidase OS=Homo sapiens OX=9606 GN=NT5C3A PE=1 SV=1	X6RM59_HUMAN (+1)		37 kDa		unknown	0	0	3	4
655	TRUE	Empty	Zinc transporter 7 OS=Homo sapiens OX=9606 GN=SLC30A7 PE=2 SV=1	ZNT7_HUMAN		42 kDa		unknown	3	3	1	3
656	TRUE	Empty	TBC1 domain family member 4 OS=Homo sapiens OX=9606 GN=TBC1D4 PE=1 SV=2	sp|O60343|TBCD4_HUMAN		147 kDa		unknown	5	4	1	1
657	TRUE	Empty	Glutamine--tRNA ligase OS=Homo sapiens OX=9606 GN=QARS PE=1 SV=1	sp|P47897|SYQ_HUMAN		88 kDa		unknown	2	3	3	1
658	TRUE	Empty	Protein PRRC2A OS=Homo sapiens OX=9606 GN=PRRC2A PE=1 SV=3	sp|P48634|PRC2A_HUMAN		229 kDa	TRUE	unknown	3	0	5	4
659	TRUE	Empty	Sodium/potassium-transporting ATPase subunit beta-3 OS=Homo sapiens OX=9606 GN=ATP1B3 PE=1 SV=1	sp|P54709|AT1B3_HUMAN		32 kDa		unknown	1	3	2	4
660	TRUE	Empty	Actin-related protein 2 OS=Homo sapiens OX=9606 GN=ACTR2 PE=1 SV=1	sp|P61160|ARP2_HUMAN		45 kDa		unknown	3	3	1	2
661	TRUE	Empty	Isoform 2 of Peptidyl-prolyl cis-trans isomerase FKBP8 OS=Homo sapiens OX=9606 GN=FKBP8	sp|Q14318-2|FKBP8_HUMAN		45 kDa		unknown	2	3	2	3
662	TRUE	Empty	Isoform 2 of APC membrane recruitment protein 1 OS=Homo sapiens OX=9606 GN=AMER1	sp|Q5JTC6-2|AMER1_HUMAN		88 kDa		unknown	3	3	2	3
663	TRUE	Empty	Isoform 2 of Metalloreductase STEAP3 OS=Homo sapiens OX=9606 GN=STEAP3	sp|Q658P3-2|STEA3_HUMAN (+2)		56 kDa		unknown	5	5	1	0
664	TRUE	Empty	Sec1 family domain-containing protein 1 OS=Homo sapiens OX=9606 GN=SCFD1 PE=1 SV=4	sp|Q8WVM8|SCFD1_HUMAN		72 kDa		unknown	3	2	2	2
665	TRUE	Empty	Isoform 2 of Testisin OS=Homo sapiens OX=9606 GN=PRSS21	sp|Q9Y6M0-2|TEST_HUMAN (+1)		35 kDa		unknown	4	4	2	1
666	TRUE	Empty	Isoform 2 of Pericentrin OS=Homo sapiens OX=9606 GN=PCNT	sp|O95613-2|PCNT_HUMAN (+1)		356 kDa		unknown	3	3	0	1
667	TRUE	Empty	Isoform 2 of Thioredoxin-dependent peroxide reductase, mitochondrial OS=Homo sapiens OX=9606 GN=PRDX3	sp|P30048-2|PRDX3_HUMAN (+1)		26 kDa		unknown	1	4	3	1
668	TRUE	Empty	Heat shock protein 75 kDa, mitochondrial OS=Homo sapiens OX=9606 GN=TRAP1 PE=1 SV=3	sp|Q12931|TRAP1_HUMAN		80 kDa		unknown	2	3	3	2
669	TRUE	Empty	Isoform 2 of Myelin protein zero-like protein 1 OS=Homo sapiens OX=9606 GN=MPZL1	sp|O95297-2|MPZL1_HUMAN (+1)		29 kDa		unknown	3	4	2	2
670	TRUE	Empty	40S ribosomal protein S18 OS=Homo sapiens OX=9606 GN=RPS18 PE=1 SV=3	RS18_HUMAN		18 kDa		unknown	1	2	2	3
671	TRUE	Empty	T-complex protein 1 subunit epsilon OS=Homo sapiens OX=9606 GN=CCT5 PE=1 SV=1	E7ENZ3_HUMAN (+1)		54 kDa		unknown	3	3	3	2
672	TRUE	Empty	Kinesin-like protein KIF11 OS=Homo sapiens OX=9606 GN=KIF11 PE=1 SV=2	KIF11_HUMAN		119 kDa		unknown	3	1	3	2
673	TRUE	Empty	Isoform 3 of Reticulon-3 OS=Homo sapiens OX=9606 GN=RTN3	sp|O95197-3|RTN3_HUMAN		26 kDa		unknown	2	3	3	3
674	TRUE	Empty	Phenylalanine--tRNA ligase beta subunit OS=Homo sapiens OX=9606 GN=FARSB PE=1 SV=3	sp|Q9NSD9|SYFB_HUMAN		66 kDa		unknown	2	3	2	0
675	TRUE	Empty	Vesicle transport protein SEC20 OS=Homo sapiens OX=9606 GN=BNIP1 PE=1 SV=3	sp|Q12981|SEC20_HUMAN		26 kDa		unknown	0	1	1	2
676	TRUE	Empty	Microsomal glutathione S-transferase 1 OS=Homo sapiens OX=9606 GN=MGST1 PE=1 SV=1	sp|P10620|MGST1_HUMAN		18 kDa		unknown	2	3	2	2
677	TRUE	Empty	Transmembrane protein 109 OS=Homo sapiens OX=9606 GN=TMEM109 PE=1 SV=1	TM109_HUMAN		26 kDa		unknown	2	2	2	2
678	TRUE	Empty	Peptidyl-tRNA hydrolase 2, mitochondrial OS=Homo sapiens OX=9606 GN=PTRH2 PE=1 SV=1	J3KQ48_HUMAN (+1)		19 kDa		unknown	2	3	2	3
679	TRUE	Empty	cGMP-inhibited 3',5'-cyclic phosphodiesterase A OS=Homo sapiens OX=9606 GN=PDE3A PE=1 SV=3	PDE3A_HUMAN		125 kDa		unknown	1	2	0	0
680	TRUE	Empty	Cluster of Fatty acid desaturase 1 OS=Homo sapiens OX=9606 GN=FADS1 PE=1 SV=3 (sp|O60427|FADS1_HUMAN)	sp|O60427|FADS1_HUMAN [2]		52 kDa	TRUE	unknown	2	3	1	2
680.1	TRUE	Empty	Fatty acid desaturase 1 OS=Homo sapiens OX=9606 GN=FADS1 PE=1 SV=3	sp|O60427|FADS1_HUMAN		52 kDa	TRUE	unknown	2	3	1	2
680.2	TRUE	Empty	Fatty acid desaturase 1 OS=Homo sapiens OX=9606 GN=FADS1 PE=1 SV=1	A0A0A0MR51_HUMAN		58 kDa	TRUE	unknown	0	0	0	0
681	TRUE	Empty	Cluster of Matrin-3 OS=Homo sapiens OX=9606 GN=MATR3 PE=1 SV=1 (A8MXP9_HUMAN)	A8MXP9_HUMAN [2]		100 kDa	TRUE	unknown	0	0	2	2
681.1	TRUE	Empty	Matrin-3 OS=Homo sapiens OX=9606 GN=MATR3 PE=1 SV=1	A8MXP9_HUMAN		100 kDa	TRUE	unknown	0	0	2	2
681.2	TRUE	Empty	Matrin-3 (Fragment) OS=Homo sapiens OX=9606 GN=MATR3 PE=1 SV=1	D6RAY2_HUMAN		9 kDa	TRUE	unknown	0	0	0	0
682	TRUE	Empty	Cluster of Heterogeneous nuclear ribonucleoproteins C1/C2 OS=Homo sapiens OX=9606 GN=HNRNPC PE=1 SV=1 (B2R5W2_HUMAN)	B2R5W2_HUMAN [12]		32 kDa	TRUE	unknown	0	0	6	5
682.1	TRUE	Empty	Heterogeneous nuclear ribonucleoproteins C1/C2 OS=Homo sapiens OX=9606 GN=HNRNPC PE=1 SV=1	B2R5W2_HUMAN (+8)		32 kDa	TRUE	unknown	0	0	6	5
682.2	TRUE	Empty	Heterogeneous nuclear ribonucleoprotein C-like 4 OS=Homo sapiens OX=9606 PE=4 SV=1	A0A0G2JPF8_HUMAN (+2)		32 kDa	TRUE	unknown	0	0	0	0
683	TRUE	Empty	CLK4-associating serine/arginine-rich protein OS=Homo sapiens OX=9606 GN=CLASRP PE=1 SV=1	A0A0A0MQS2_HUMAN (+3)		77 kDa		unknown	0	0	5	5
684	TRUE	Empty	Protein TMED7-TICAM2 OS=Homo sapiens OX=9606 GN=TMED7-TICAM2 PE=3 SV=1	A0A0A6YYA0_HUMAN (+3)		21 kDa		unknown	0	3	4	3
685	TRUE	Empty	Actin-related protein 2/3 complex subunit 2 OS=Homo sapiens OX=9606 GN=ARPC2 PE=1 SV=1	ARPC2_HUMAN		34 kDa		unknown	2	4	0	1
686	TRUE	Empty	Capping protein (Actin filament) muscle Z-line, beta, isoform CRA_d OS=Homo sapiens OX=9606 GN=CAPZB PE=1 SV=1	B1AK88_HUMAN		34 kDa		unknown	2	3	1	2
687	TRUE	Empty	Charged multivesicular body protein 4b OS=Homo sapiens OX=9606 GN=CHMP4B PE=1 SV=1	CHM4B_HUMAN		25 kDa		unknown	3	2	1	2
688	TRUE	Empty	Complement C3 OS=Homo sapiens OX=9606 GN=C3 PE=1 SV=2	CO3_HUMAN		187 kDa		unknown	0	3	0	0
689	TRUE	Empty	60S ribosomal protein L27a OS=Homo sapiens OX=9606 GN=RPL27A PE=1 SV=1	E9PJD9_HUMAN (+2)		10 kDa		unknown	1	3	3	3
690	TRUE	Empty	60S ribosomal protein L28 OS=Homo sapiens OX=9606 GN=RPL28 PE=1 SV=1	H0YKD8_HUMAN (+7)		19 kDa		unknown	2	3	2	2
691	TRUE	Empty	Histidine triad nucleotide-binding protein 3 OS=Homo sapiens OX=9606 GN=HINT3 PE=1 SV=1	HINT3_HUMAN		20 kDa		unknown	3	3	1	2
692	TRUE	Empty	DnaJ (Hsp40) homolog, subfamily B, member 12, isoform CRA_c OS=Homo sapiens OX=9606 GN=DNAJB12 PE=1 SV=1	J3KPS0_HUMAN		45 kDa		unknown	3	4	1	2
693	TRUE	Empty	Coatomer protein complex, subunit epsilon, isoform CRA_g OS=Homo sapiens OX=9606 GN=COPE PE=1 SV=1	M0QXB4_HUMAN (+2)		37 kDa		unknown	2	4	2	2
694	TRUE	Empty	MARCKS-related protein OS=Homo sapiens OX=9606 GN=MARCKSL1 PE=1 SV=2	MRP_HUMAN		20 kDa		unknown	3	3	2	2
695	TRUE	Empty	Pre-mRNA-processing factor 19 OS=Homo sapiens OX=9606 GN=PRPF19 PE=1 SV=1	PRP19_HUMAN		55 kDa		unknown	0	0	4	4
696	TRUE	Empty	Mov10, Moloney leukemia virus 10, homolog (Mouse), isoform CRA_a OS=Homo sapiens OX=9606 GN=MOV10 PE=1 SV=1	Q5JR04_HUMAN		107 kDa		unknown	1	1	4	2
697	TRUE	Empty	Torsin-1A OS=Homo sapiens OX=9606 GN=TOR1A PE=1 SV=1	TOR1A_HUMAN		38 kDa		unknown	1	2	3	3
698	TRUE	Empty	Isoform 2 of Peroxisomal membrane protein 11B OS=Homo sapiens OX=9606 GN=PEX11B	sp|O96011-2|PX11B_HUMAN (+1)		27 kDa		unknown	3	2	1	2
699	TRUE	Empty	Proteasome subunit alpha type-5 OS=Homo sapiens OX=9606 GN=PSMA5 PE=1 SV=3	sp|P28066|PSA5_HUMAN		26 kDa		unknown	1	2	2	3
700	TRUE	Empty	Isoform Cytoplasmic+peroxisomal of Peroxiredoxin-5, mitochondrial OS=Homo sapiens OX=9606 GN=PRDX5	sp|P30044-2|PRDX5_HUMAN (+1)		17 kDa		unknown	0	2	4	4
701	TRUE	Empty	Isoform 2 of T-complex protein 1 subunit beta OS=Homo sapiens OX=9606 GN=CCT2	sp|P78371-2|TCPB_HUMAN (+1)		53 kDa		unknown	1	3	4	2
702	TRUE	Empty	Myotubularin-related protein 2 OS=Homo sapiens OX=9606 GN=MTMR2 PE=1 SV=4	sp|Q13614|MTMR2_HUMAN		73 kDa		unknown	5	4	0	0
703	TRUE	Empty	Isoform 2 of Phosphatidate phosphatase LPIN1 OS=Homo sapiens OX=9606 GN=LPIN1	sp|Q14693-2|LPIN1_HUMAN (+5)		99 kDa		unknown	3	7	0	0
704	TRUE	Empty	Arginine/serine-rich coiled-coil protein 2 OS=Homo sapiens OX=9606 GN=RSRC2 PE=1 SV=1	sp|Q7L4I2|RSRC2_HUMAN		51 kDa		unknown	1	0	6	3
705	TRUE	Empty	Rhophilin-2 OS=Homo sapiens OX=9606 GN=RHPN2 PE=1 SV=1	sp|Q8IUC4|RHPN2_HUMAN		77 kDa		unknown	3	5	0	1
706	TRUE	Empty	Protein disulfide-isomerase TMX3 OS=Homo sapiens OX=9606 GN=TMX3 PE=1 SV=2	sp|Q96JJ7|TMX3_HUMAN		52 kDa		unknown	1	3	1	2
707	TRUE	Empty	Leucine-rich repeat-containing protein 1 OS=Homo sapiens OX=9606 GN=LRRC1 PE=1 SV=1	sp|Q9BTT6|LRRC1_HUMAN		59 kDa	TRUE	unknown	1	4	5	5
708	TRUE	Empty	A-kinase anchor protein 8-like OS=Homo sapiens OX=9606 GN=AKAP8L PE=1 SV=3	sp|Q9ULX6|AKP8L_HUMAN		72 kDa		unknown	5	1	2	1
709	TRUE	Empty	Isoform 2 of RNA-binding protein 8A OS=Homo sapiens OX=9606 GN=RBM8A	sp|Q9Y5S9-2|RBM8A_HUMAN		20 kDa		unknown	0	1	4	3
710	TRUE	Empty	GPI-anchor transamidase OS=Homo sapiens OX=9606 GN=PIGK PE=1 SV=1	B1AK81_HUMAN (+2)		34 kDa		unknown	3	2	2	1
711	TRUE	Empty	Complement decay-accelerating factor OS=Homo sapiens OX=9606 GN=CD55 PE=1 SV=1	B1AP13_HUMAN (+7)		49 kDa		unknown	1	3	2	1
712	TRUE	Empty	Transmembrane 9 superfamily member (Fragment) OS=Homo sapiens OX=9606 GN=TM9SF3 PE=1 SV=8	Q5TB53_HUMAN (+1)		30 kDa		unknown	3	3	2	2
713	TRUE	Empty	Signal peptidase complex subunit 1 OS=Homo sapiens OX=9606 GN=SPCS1 PE=1 SV=4	SPCS1_HUMAN		12 kDa		unknown	2	3	1	3
714	TRUE	Empty	Isoform Mitochondrial of Lysine--tRNA ligase OS=Homo sapiens OX=9606 GN=KARS	sp|Q15046-2|SYK_HUMAN (+1)		71 kDa		unknown	3	1	1	3
715	TRUE	Empty	Chitobiosyldiphosphodolichol beta-mannosyltransferase OS=Homo sapiens OX=9606 GN=ALG1 PE=1 SV=2	sp|Q9BT22|ALG1_HUMAN		53 kDa		unknown	3	3	2	2
716	TRUE	Empty	Isoform 2 of Endoplasmic reticulum junction formation protein lunapark OS=Homo sapiens OX=9606 GN=LNPK	sp|Q9C0E8-2|LNP_HUMAN (+2)		47 kDa		unknown	3	2	3	1
717	TRUE	Empty	Isoform 2 of Proliferation-associated protein 2G4 OS=Homo sapiens OX=9606 GN=PA2G4	sp|Q9UQ80-2|PA2G4_HUMAN (+1)		38 kDa		unknown	2	3	2	2
718	TRUE	Empty	Cofilin-1 OS=Homo sapiens OX=9606 GN=CFL1 PE=1 SV=3	COF1_HUMAN (+2)		19 kDa		unknown	2	1	4	2
719	TRUE	Empty	Small integral membrane protein 13 OS=Homo sapiens OX=9606 GN=SMIM13 PE=3 SV=1	SIM13_HUMAN		10 kDa		unknown	2	4	1	3
720	TRUE	Empty	Isoform 2 of Procollagen-lysine,2-oxoglutarate 5-dioxygenase 1 OS=Homo sapiens OX=9606 GN=PLOD1	sp|Q02809-2|PLOD1_HUMAN (+1)		88 kDa		unknown	4	3	3	1
721	TRUE	Empty	Procollagen-lysine,2-oxoglutarate 5-dioxygenase 3 OS=Homo sapiens OX=9606 GN=PLOD3 PE=1 SV=1	PLOD3_HUMAN		85 kDa		unknown	3	2	4	4
722	TRUE	Empty	Isoform 2 of Hepatocyte growth factor-regulated tyrosine kinase substrate OS=Homo sapiens OX=9606 GN=HGS	sp|O14964-2|HGS_HUMAN		76 kDa		unknown	2	3	1	1
723	TRUE	Empty	Isoform 2 of Protein ECT2 OS=Homo sapiens OX=9606 GN=ECT2	sp|Q9H8V3-2|ECT2_HUMAN (+3)		100 kDa		unknown	4	3	0	0
724	TRUE	Empty	Solute carrier family 22 (Organic cation transporter), member 18, isoform CRA_a OS=Homo sapiens OX=9606 GN=SLC22A18 PE=1 SV=1	A0A024RCG2_HUMAN (+3)		45 kDa		unknown	1	2	2	2
725	TRUE	Empty	Minor histocompatibility antigen H13 (Fragment) OS=Homo sapiens OX=9606 GN=HM13 PE=1 SV=1	A0A075B6F6_HUMAN (+4)		30 kDa		unknown	2	2	2	2
726	TRUE	Empty	Histone H2A OS=Homo sapiens OX=9606 GN=hCG_2039566 PE=3 SV=1	A0A0U1RR32_HUMAN (+11)		18 kDa		unknown	1	1	2	2
727	TRUE	Empty	Retinoic acid-induced protein 3 OS=Homo sapiens OX=9606 GN=GPRC5A PE=1 SV=2	RAI3_HUMAN		40 kDa		unknown	2	1	2	2
728	TRUE	Empty	Protein S100-A14 OS=Homo sapiens OX=9606 GN=S100A14 PE=1 SV=1	S10AE_HUMAN		12 kDa		unknown	1	1	2	1
729	TRUE	Empty	Mitochondrial amidoxime reducing component 2 OS=Homo sapiens OX=9606 GN=MARC2 PE=1 SV=1	sp|Q969Z3|MARC2_HUMAN		38 kDa		unknown	0	2	2	1
730	TRUE	Empty	NAD(P) transhydrogenase, mitochondrial OS=Homo sapiens OX=9606 GN=NNT PE=1 SV=3	NNTM_HUMAN		114 kDa		unknown	1	2	2	2
731	TRUE	Empty	Cluster of Sulfatase-modifying factor 2 OS=Homo sapiens OX=9606 GN=SUMF2 PE=1 SV=2 (A8MXB9_HUMAN)	A8MXB9_HUMAN [4]		34 kDa	TRUE	unknown	2	3	2	3
731.1	TRUE	Empty	Sulfatase-modifying factor 2 OS=Homo sapiens OX=9606 GN=SUMF2 PE=1 SV=2	A8MXB9_HUMAN (+2)		34 kDa	TRUE	unknown	2	3	2	3
731.2	TRUE	Empty	Isoform 4 of Sulfatase-modifying factor 2 OS=Homo sapiens OX=9606 GN=SUMF2	sp|Q8NBJ7-4|SUMF2_HUMAN		34 kDa	TRUE	unknown	0	0	0	0
732	TRUE	Empty	Kinesin-like protein KIF14 OS=Homo sapiens OX=9606 GN=KIF14 PE=1 SV=1	KIF14_HUMAN		186 kDa		unknown	1	2	1	2
733	TRUE	Empty	Uncharacterized protein OS=Homo sapiens OX=9606 PE=4 SV=1	A0A286YFD6_HUMAN (+2)		43 kDa		unknown	3	2	1	2
734	TRUE	Empty	SYNJ2BP-COX16 readthrough (Fragment) OS=Homo sapiens OX=9606 GN=SYNJ2BP-COX16 PE=4 SV=1	A0A087WUM0_HUMAN (+1)		21 kDa		unknown	2	1	1	3
735	TRUE	Empty	Argininosuccinate synthase OS=Homo sapiens OX=9606 GN=ASS1 PE=1 SV=2	ASSY_HUMAN		47 kDa		unknown	1	1	2	1
736	TRUE	Empty	60S ribosomal protein L38 OS=Homo sapiens OX=9606 GN=RPL38 PE=1 SV=2	RL38_HUMAN		8 kDa		unknown	1	1	3	2
737	TRUE	Empty	Isoform 2B of Cytoplasmic dynein 1 intermediate chain 2 OS=Homo sapiens OX=9606 GN=DYNC1I2	sp|Q13409-2|DC1I2_HUMAN (+5)		71 kDa		unknown	1	2	0	1
738	TRUE	Empty	Dynein light chain 1, cytoplasmic OS=Homo sapiens OX=9606 GN=DYNLL1 PE=1 SV=1	DYL1_HUMAN		10 kDa	TRUE	unknown	3	3	4	2
739	TRUE	Empty	Cluster of Isoform 2 of Formin-like protein 2 OS=Homo sapiens OX=9606 GN=FMNL2 (sp|Q96PY5-3|FMNL2_HUMAN)	sp|Q96PY5-3|FMNL2_HUMAN [6]		124 kDa	TRUE	unknown	2	7	4	2
739.1	TRUE	Empty	Isoform 2 of Formin-like protein 2 OS=Homo sapiens OX=9606 GN=FMNL2	sp|Q96PY5-3|FMNL2_HUMAN (+1)		124 kDa	TRUE	unknown	2	7	4	2
739.2	TRUE	Empty	Formin-like protein 3 OS=Homo sapiens OX=9606 GN=FMNL3 PE=1 SV=1	F8W1F5_HUMAN (+3)		117 kDa	TRUE	unknown	0	0	0	0
740	TRUE	Empty	Cluster of Isoform 3 of Serine/threonine-protein kinase D2 OS=Homo sapiens OX=9606 GN=PRKD2 (sp|Q9BZL6-3|KPCD2_HUMAN)	sp|Q9BZL6-3|KPCD2_HUMAN [5]		98 kDa	TRUE	unknown	3	5	0	0
740.1	TRUE	Empty	Isoform 3 of Serine/threonine-protein kinase D2 OS=Homo sapiens OX=9606 GN=PRKD2	sp|Q9BZL6-3|KPCD2_HUMAN (+1)		98 kDa	TRUE	unknown	2	3	0	0
740.2	TRUE	Empty	Serine/threonine-protein kinase D3 OS=Homo sapiens OX=9606 GN=PRKD3 PE=1 SV=1	sp|O94806|KPCD3_HUMAN		100 kDa	TRUE	unknown	2	2	0	0
740.3	TRUE	Empty	Serine/threonine-protein kinase OS=Homo sapiens OX=9606 GN=PRKD1 PE=1 SV=1	F8WBA3_HUMAN (+1)		103 kDa	TRUE	unknown	1	2	0	0
741	TRUE	Empty	Ral GTPase-activating protein subunit beta (Fragment) OS=Homo sapiens OX=9606 GN=RALGAPB PE=1 SV=1	A2A2F0_HUMAN (+1)		147 kDa		unknown	2	5	0	0
742	TRUE	Empty	Cytochrome c oxidase subunit 5B, mitochondrial OS=Homo sapiens OX=9606 GN=COX5B PE=1 SV=2	COX5B_HUMAN		14 kDa		unknown	2	1	2	3
743	TRUE	Empty	ER membrane protein complex subunit 2 OS=Homo sapiens OX=9606 GN=EMC2 PE=1 SV=1	EMC2_HUMAN		35 kDa		unknown	3	2	2	2
744	TRUE	Empty	Unconventional myosin-Ic OS=Homo sapiens OX=9606 GN=MYO1C PE=1 SV=1	F5H6E2_HUMAN (+3)		119 kDa		unknown	1	4	0	1
745	TRUE	Empty	SAP30-binding protein (Fragment) OS=Homo sapiens OX=9606 GN=SAP30BP PE=1 SV=1	J3QQJ0_HUMAN (+2)		36 kDa		unknown	0	0	4	2
746	TRUE	Empty	WD repeat-containing protein 18 OS=Homo sapiens OX=9606 GN=WDR18 PE=1 SV=1	K7EIR0_HUMAN (+1)		45 kDa		unknown	4	3	1	1
747	TRUE	Empty	Vesicular integral-membrane protein VIP36 OS=Homo sapiens OX=9606 GN=LMAN2 PE=1 SV=1	LMAN2_HUMAN		40 kDa	TRUE	unknown	2	1	0	3
748	TRUE	Empty	Alpha-mannosidase 2 OS=Homo sapiens OX=9606 GN=MAN2A1 PE=1 SV=2	MA2A1_HUMAN		131 kDa		unknown	3	1	2	2
749	TRUE	Empty	Peroxiredoxin-1 OS=Homo sapiens GN=PRDX1 PE=1 SV=1	PRDX1_HUMAN	PRDX1	22 kDa	TRUE	unknown	5	4	2	3
750	TRUE	Empty	Ras-related protein Rab-21 OS=Homo sapiens OX=9606 GN=RAB21 PE=1 SV=3	RAB21_HUMAN		24 kDa		unknown	3	3	1	1
751	TRUE	Empty	Small nuclear ribonucleoprotein Sm D1 OS=Homo sapiens OX=9606 GN=SNRPD1 PE=1 SV=1	SMD1_HUMAN		13 kDa		unknown	0	0	5	4
752	TRUE	Empty	Isoform 2 of 26S proteasome non-ATPase regulatory subunit 11 OS=Homo sapiens OX=9606 GN=PSMD11	sp|O00231-2|PSD11_HUMAN (+1)		48 kDa		unknown	0	0	3	4
753	TRUE	Empty	26S proteasome non-ATPase regulatory subunit 3 OS=Homo sapiens OX=9606 GN=PSMD3 PE=1 SV=2	sp|O43242|PSMD3_HUMAN		61 kDa		unknown	1	3	2	0
754	TRUE	Empty	Isoform 2 of GTPase-activating protein and VPS9 domain-containing protein 1 OS=Homo sapiens OX=9606 GN=GAPVD1	sp|Q14C86-2|GAPD1_HUMAN (+4)		163 kDa		unknown	1	5	0	0
755	TRUE	Empty	Isoform 3 of Lysocardiolipin acyltransferase 1 OS=Homo sapiens OX=9606 GN=LCLAT1	sp|Q6UWP7-3|LCLT1_HUMAN (+1)		45 kDa		unknown	3	3	0	2
756	TRUE	Empty	Rab11 family-interacting protein 1 OS=Homo sapiens OX=9606 GN=RAB11FIP1 PE=1 SV=3	sp|Q6WKZ4|RFIP1_HUMAN		137 kDa		unknown	4	4	0	1
757	TRUE	Empty	Sodium-coupled neutral amino acid transporter 1 OS=Homo sapiens OX=9606 GN=SLC38A1 PE=1 SV=1	F8VX04_HUMAN (+1)		56 kDa		unknown	2	3	2	2
758	TRUE	Empty	Nucleolar protein 56 OS=Homo sapiens OX=9606 GN=NOP56 PE=1 SV=4	NOP56_HUMAN		66 kDa		unknown	0	2	4	3
759	TRUE	Empty	ATP synthase subunit O, mitochondrial OS=Homo sapiens OX=9606 GN=ATP5O PE=1 SV=1	ATPO_HUMAN		23 kDa		unknown	1	2	1	1
760	TRUE	Empty	Chloride intracellular channel protein 1 OS=Homo sapiens OX=9606 GN=CLIC1 PE=1 SV=4	CLIC1_HUMAN		27 kDa		unknown	1	2	2	3
761	TRUE	Empty	Syntaxin-12 (Fragment) OS=Homo sapiens OX=9606 GN=STX12 PE=1 SV=2	B1AJQ6_HUMAN (+1)		25 kDa		unknown	1	4	2	0
762	TRUE	Empty	RNA transcription, translation and transport factor protein OS=Homo sapiens OX=9606 GN=RTRAF PE=1 SV=1	RTRAF_HUMAN		28 kDa		unknown	0	0	2	3
763	TRUE	Empty	Isoform Short of Beta-1,4-galactosyltransferase 1 OS=Homo sapiens OX=9606 GN=B4GALT1	sp|P15291-2|B4GT1_HUMAN		43 kDa		unknown	0	3	3	3
764	TRUE	Empty	Magnesium transporter protein 1 OS=Homo sapiens OX=9606 GN=MAGT1 PE=1 SV=1	A0A087WU53_HUMAN (+1)		42 kDa		unknown	2	1	4	1
765	TRUE	Empty	DNA-directed RNA polymerase subunit beta OS=Homo sapiens OX=9606 GN=POLR2B PE=1 SV=1	A0A1W2PPT5_HUMAN (+3)		125 kDa		unknown	2	1	2	2
766	TRUE	Empty	Ran GTPase-activating protein 1 OS=Homo sapiens OX=9606 GN=RANGAP1 PE=1 SV=1	RAGP1_HUMAN		64 kDa		unknown	2	2	2	1
767	TRUE	Empty	Isoform 2 of Neuropathy target esterase OS=Homo sapiens OX=9606 GN=PNPLA6	sp|Q8IY17-2|PLPL6_HUMAN (+3)		146 kDa	TRUE	unknown	1	2	2	2
768	TRUE	Empty	Adipocyte plasma membrane-associated protein OS=Homo sapiens OX=9606 GN=APMAP PE=1 SV=2	sp|Q9HDC9|APMAP_HUMAN		46 kDa		unknown	0	4	2	2
769	TRUE	Empty	Phospholipase D3 OS=Homo sapiens OX=9606 GN=PLD3 PE=1 SV=1	PLD3_HUMAN		55 kDa		unknown	0	2	2	1
770	TRUE	Empty	Tyrosine-protein kinase Fer OS=Homo sapiens OX=9606 GN=FER PE=1 SV=2	sp|P16591|FER_HUMAN		95 kDa		unknown	3	2	0	0
771	TRUE	Empty	Myb-binding protein 1A (Fragment) OS=Homo sapiens OX=9606 GN=MYBBP1A PE=1 SV=1	I3L1L3_HUMAN (+2)		140 kDa		unknown	3	2	1	1
772	TRUE	Empty	Signal peptidase I (Fragment) OS=Homo sapiens OX=9606 GN=SEC11A PE=1 SV=1	H0YNA5_HUMAN (+6)		16 kDa		unknown	2	1	1	0
773	TRUE	Empty	Isoform 2 of 60S ribosomal protein L11 OS=Homo sapiens OX=9606 GN=RPL11	sp|P62913-2|RL11_HUMAN		20 kDa		unknown	2	2	2	2
774	TRUE	Empty	Isoform 2 of Mitochondrial import inner membrane translocase subunit TIM50 OS=Homo sapiens OX=9606 GN=TIMM50	sp|Q3ZCQ8-2|TIM50_HUMAN		50 kDa		unknown	1	2	2	2
775	TRUE	Empty	40S ribosomal protein S24 OS=Homo sapiens OX=9606 GN=RPS24 PE=1 SV=1	A0A087WUS0_HUMAN (+5)		15 kDa		unknown	1	2	3	2
776	TRUE	Empty	Beta-2-microglobulin OS=Homo sapiens GN=B2M PE=1 SV=1	B2MG_HUMAN (+2)	B2M	14 kDa		unknown	2	3	2	2
777	TRUE	Empty	Nuclear receptor corepressor 1 (Fragment) OS=Homo sapiens OX=9606 GN=NCOR1 PE=1 SV=2	E7EVK1_HUMAN		116 kDa		unknown	3	3	1	2
778	TRUE	Empty	Enhancer of rudimentary homolog OS=Homo sapiens OX=9606 GN=ERH PE=1 SV=1	ERH_HUMAN		12 kDa		unknown	1	2	3	3
779	TRUE	Empty	Isoform 6 of CCR4-NOT transcription complex subunit 10 OS=Homo sapiens OX=9606 GN=CNOT10	sp|Q9H9A5-6|CNO10_HUMAN		89 kDa		unknown	2	3	2	1
780	TRUE	Empty	60S ribosomal protein L21 OS=Homo sapiens OX=9606 GN=RPL21 PE=1 SV=2	RL21_HUMAN		19 kDa		unknown	1	1	3	2
781	TRUE	Empty	Protein PRRC2C OS=Homo sapiens OX=9606 GN=PRRC2C PE=1 SV=1	E7EPN9_HUMAN (+6)		309 kDa	TRUE	unknown	0	2	2	0
782	TRUE	Empty	Cluster of Isoform 2 of RNA-binding protein 26 OS=Homo sapiens OX=9606 GN=RBM26 (sp|Q5T8P6-2|RBM26_HUMAN)	sp|Q5T8P6-2|RBM26_HUMAN [4]		111 kDa	TRUE	unknown	1	2	3	2
782.1	TRUE	Empty	Isoform 2 of RNA-binding protein 26 OS=Homo sapiens OX=9606 GN=RBM26	sp|Q5T8P6-2|RBM26_HUMAN (+1)		111 kDa	TRUE	unknown	1	2	3	2
782.2	TRUE	Empty	RNA-binding protein 27 OS=Homo sapiens OX=9606 GN=RBM27 PE=1 SV=2	RBM27_HUMAN (+1)		119 kDa	TRUE	unknown	0	0	0	0
783	TRUE	Empty	Cluster of Cytoplasmic FMR1-interacting protein 1 OS=Homo sapiens OX=9606 GN=CYFIP1 PE=1 SV=1 (sp|Q7L576|CYFP1_HUMAN)	sp|Q7L576|CYFP1_HUMAN [2]		145 kDa	TRUE	unknown	2	1	0	0
783.1	TRUE	Empty	Cytoplasmic FMR1-interacting protein 1 OS=Homo sapiens OX=9606 GN=CYFIP1 PE=1 SV=1	sp|Q7L576|CYFP1_HUMAN		145 kDa	TRUE	unknown	2	1	0	0
783.2	TRUE	Empty	Isoform 2 of Cytoplasmic FMR1-interacting protein 1 OS=Homo sapiens OX=9606 GN=CYFIP1	sp|Q7L576-2|CYFP1_HUMAN		94 kDa	TRUE	unknown	0	0	0	0
784	TRUE	Empty	40S ribosomal protein S17 OS=Homo sapiens OX=9606 GN=RPS17 PE=1 SV=1	A0A075B716_HUMAN (+3)		22 kDa		unknown	1	1	3	3
785	TRUE	Empty	Amyloid-beta A4 protein OS=Homo sapiens OX=9606 GN=APP PE=1 SV=1	E9PG40_HUMAN (+5)		81 kDa	TRUE	unknown	2	4	1	0
786	TRUE	Empty	Phosphoinositide 3-kinase regulatory subunit 4 OS=Homo sapiens OX=9606 GN=PIK3R4 PE=1 SV=3	PI3R4_HUMAN		153 kDa		unknown	2	3	2	0
787	TRUE	Empty	Isoform 2 of Neuroblastoma-amplified sequence OS=Homo sapiens OX=9606 GN=NBAS	sp|A2RRP1-2|NBAS_HUMAN (+1)		255 kDa		unknown	4	2	0	1
788	TRUE	Empty	Isoform 2 of E3 ubiquitin-protein ligase MYCBP2 OS=Homo sapiens OX=9606 GN=MYCBP2	sp|O75592-2|MYCB2_HUMAN (+1)		510 kDa		unknown	3	2	0	1
789	TRUE	Empty	Carboxypeptidase D OS=Homo sapiens OX=9606 GN=CPD PE=1 SV=2	sp|O75976|CBPD_HUMAN		153 kDa		unknown	1	6	0	0
790	TRUE	Empty	Isoform 4 of Myotubularin-related protein 5 OS=Homo sapiens OX=9606 GN=SBF1	sp|O95248-4|MTMR5_HUMAN (+2)		211 kDa	TRUE	unknown	3	5	0	0
791	TRUE	Empty	Isoform 2 of Cationic amino acid transporter 2 OS=Homo sapiens OX=9606 GN=SLC7A2	sp|P52569-2|CTR2_HUMAN		76 kDa		unknown	1	4	1	2
792	TRUE	Empty	Isoform 2 of Nuclear pore complex protein Nup98-Nup96 OS=Homo sapiens OX=9606 GN=NUP98	sp|P52948-2|NUP98_HUMAN (+3)		187 kDa		unknown	5	3	0	0
793	TRUE	Empty	Protein VAC14 homolog OS=Homo sapiens OX=9606 GN=VAC14 PE=1 SV=1	sp|Q08AM6|VAC14_HUMAN		88 kDa		unknown	3	3	0	0
794	TRUE	Empty	Proprotein convertase subtilisin/kexin type 9 OS=Homo sapiens OX=9606 GN=PCSK9 PE=1 SV=3	sp|Q8NBP7|PCSK9_HUMAN		74 kDa		unknown	2	4	2	0
795	TRUE	Empty	Isoform 2 of Golgi apparatus protein 1 OS=Homo sapiens OX=9606 GN=GLG1	sp|Q92896-2|GSLG1_HUMAN (+2)		137 kDa		unknown	3	3	0	0
796	TRUE	Empty	Oral-facial-digital syndrome 1 protein OS=Homo sapiens OX=9606 GN=OFD1 PE=1 SV=1	A6NF31_HUMAN (+2)		101 kDa		unknown	3	3	0	0
797	TRUE	Empty	Probable ATP-dependent RNA helicase DDX56 OS=Homo sapiens OX=9606 GN=DDX56 PE=1 SV=1	F8WDT8_HUMAN (+4)		20 kDa		unknown	1	2	3	2
798	TRUE	Empty	Cisplatin resistance related protein CRR9p, isoform CRA_c OS=Homo sapiens OX=9606 GN=CLPTM1L PE=1 SV=1	G5E9Z2_HUMAN		43 kDa		unknown	3	2	1	2
799	TRUE	Empty	Calcium load-activated calcium channel OS=Homo sapiens OX=9606 GN=TMCO1 PE=1 SV=1	J9JIE6_HUMAN (+2)		27 kDa		unknown	1	2	3	2
800	TRUE	Empty	Mitochondrial carrier homolog 2 OS=Homo sapiens OX=9606 GN=MTCH2 PE=1 SV=1	MTCH2_HUMAN		33 kDa		unknown	0	4	1	1
801	TRUE	Empty	Thioredoxin domain-containing protein 12 OS=Homo sapiens OX=9606 GN=TXNDC12 PE=1 SV=1	TXD12_HUMAN		19 kDa		unknown	1	3	2	2
802	TRUE	Empty	Inosine-5'-monophosphate dehydrogenase 2 (Fragment) OS=Homo sapiens OX=9606 GN=IMPDH2 PE=1 SV=1	H0Y4R1_HUMAN (+1)		51 kDa		unknown	2	2	3	1
803	TRUE	Empty	Peroxiredoxin-6 OS=Homo sapiens OX=9606 GN=PRDX6 PE=1 SV=3	PRDX6_HUMAN		25 kDa		unknown	1	1	2	1
804	TRUE	Empty	P antigen family member 1 OS=Homo sapiens OX=9606 GN=PAGE1 PE=1 SV=2	PAGE1_HUMAN		16 kDa		unknown	3	2	1	1
805	TRUE	Empty	Synaptobrevin homolog YKT6 OS=Homo sapiens OX=9606 GN=YKT6 PE=1 SV=1	sp|O15498|YKT6_HUMAN		22 kDa		unknown	1	0	2	2
806	TRUE	Empty	EF-hand domain-containing protein D2 OS=Homo sapiens OX=9606 GN=EFHD2 PE=1 SV=1	EFHD2_HUMAN		27 kDa		unknown	2	0	1	2
807	TRUE	Empty	Transmembrane emp24 domain-containing protein 5 OS=Homo sapiens OX=9606 GN=TMED5 PE=1 SV=1	sp|Q9Y3A6|TMED5_HUMAN		26 kDa		unknown	0	1	1	2
808	TRUE	Empty	Protein XRP2 OS=Homo sapiens OX=9606 GN=RP2 PE=1 SV=4	XRP2_HUMAN		40 kDa		unknown	0	2	0	1
809	TRUE	Empty	Torsin-1A-interacting protein 1 OS=Homo sapiens OX=9606 GN=TOR1AIP1 PE=1 SV=1	A0A0A0MSK5_HUMAN (+1)		52 kDa	TRUE	unknown	2	3	3	3
810	TRUE	Empty	High density lipoprotein binding protein (Vigilin), isoform CRA_a OS=Homo sapiens OX=9606 GN=HDLBP PE=1 SV=1	A0A024R4E5_HUMAN		141 kDa		unknown	2	2	2	2
811	TRUE	Empty	BAG6 OS=Homo sapiens OX=9606 GN=BAG6 PE=1 SV=1	A0A024RCR6_HUMAN (+7)		119 kDa		unknown	2	2	2	2
812	TRUE	Empty	Acyl-CoA-binding domain-containing protein 5 OS=Homo sapiens OX=9606 GN=ACBD5 PE=1 SV=1	B7Z2R7_HUMAN (+4)		59 kDa		unknown	2	2	1	1
813	TRUE	Empty	Nuclear pore complex protein Nup160 (Fragment) OS=Homo sapiens OX=9606 GN=NUP160 PE=1 SV=2	G3V198_HUMAN		149 kDa		unknown	1	2	2	2
814	TRUE	Empty	Gamma-glutamyl hydrolase OS=Homo sapiens OX=9606 GN=GGH PE=1 SV=2	GGH_HUMAN		36 kDa		unknown	1	1	2	3
815	TRUE	Empty	Transmembrane emp24 domain-containing protein 3 OS=Homo sapiens OX=9606 GN=TMED3 PE=1 SV=1	TMED3_HUMAN		25 kDa		unknown	2	2	2	2
816	TRUE	Empty	Isoform 10 of Glucocorticoid receptor OS=Homo sapiens OX=9606 GN=NR3C1	sp|P04150-10|GCR_HUMAN (+6)		83 kDa		unknown	2	2	1	1
817	TRUE	Empty	Isoform 3 of Nucleophosmin OS=Homo sapiens OX=9606 GN=NPM1	sp|P06748-3|NPM_HUMAN (+1)		28 kDa		unknown	0	2	3	2
818	TRUE	Empty	Isoform 2 of ADP-ribosylation factor-like protein 1 OS=Homo sapiens OX=9606 GN=ARL1	sp|P40616-2|ARL1_HUMAN (+1)		19 kDa		unknown	2	2	2	2
819	TRUE	Empty	Isoform 2 of Syntaxin-5 OS=Homo sapiens OX=9606 GN=STX5	sp|Q13190-2|STX5_HUMAN (+1)		34 kDa		unknown	1	2	1	1
820	TRUE	Empty	Methylsterol monooxygenase 1 OS=Homo sapiens OX=9606 GN=MSMO1 PE=1 SV=1	sp|Q15800|MSMO1_HUMAN		35 kDa		unknown	2	1	1	2
821	TRUE	Empty	Isoform 2 of ER membrane protein complex subunit 3 OS=Homo sapiens OX=9606 GN=EMC3	sp|Q9P0I2-2|EMC3_HUMAN (+1)		25 kDa		unknown	1	2	1	3
822	TRUE	Empty	Isoform 2 of Dolichol-phosphate mannosyltransferase subunit 3 OS=Homo sapiens OX=9606 GN=DPM3	sp|Q9P2X0-2|DPM3_HUMAN (+1)		13 kDa		unknown	2	3	1	2
823	TRUE	Empty	Actin-related protein 2/3 complex subunit 4 OS=Homo sapiens OX=9606 GN=ARPC4-TTLL3 PE=3 SV=1	F8WCF6_HUMAN (+3)		21 kDa		unknown	2	2	2	1
824	TRUE	Empty	Double-stranded RNA-specific adenosine deaminase (Fragment) OS=Homo sapiens OX=9606 GN=ADAR PE=1 SV=1	H0YCK3_HUMAN (+4)		133 kDa		unknown	1	1	0	2
825	TRUE	Empty	60S ribosomal protein L35 OS=Homo sapiens OX=9606 GN=RPL35 PE=1 SV=2	RL35_HUMAN		15 kDa		unknown	1	1	1	2
826	TRUE	Empty	Retinol dehydrogenase 14 OS=Homo sapiens OX=9606 GN=RDH14 PE=1 SV=1	RDH14_HUMAN		37 kDa		unknown	2	2	1	0
827	TRUE	Empty	Heterogeneous nuclear ribonucleoprotein U-like protein 1 OS=Homo sapiens OX=9606 GN=HNRNPUL1 PE=1 SV=1	A0A0A0MRA5_HUMAN (+4)		86 kDa		unknown	1	2	1	1
828	TRUE	Empty	60S ribosomal protein L24 OS=Homo sapiens OX=9606 GN=RPL24 PE=1 SV=1	C9JNW5_HUMAN (+2)		18 kDa		unknown	2	2	2	2
829	TRUE	Empty	Syntaxin-8 OS=Homo sapiens OX=9606 GN=STX8 PE=1 SV=2	STX8_HUMAN		27 kDa		unknown	2	2	2	0
830	TRUE	Empty	E3 ubiquitin-protein ligase synoviolin (Fragment) OS=Homo sapiens OX=9606 GN=SYVN1 PE=1 SV=1	E9PMA1_HUMAN (+3)		28 kDa		unknown	1	3	1	2
831	TRUE	Empty	Paraoxonase 2, isoform CRA_a OS=Homo sapiens OX=9606 GN=PON2 PE=1 SV=1	A0A0J9YXF2_HUMAN		42 kDa		unknown	1	1	1	2
832	TRUE	Empty	Eukaryotic translation initiation factor 3 subunit H OS=Homo sapiens OX=9606 GN=EIF3H PE=1 SV=1	B3KS98_HUMAN (+1)		42 kDa		unknown	1	1	2	1
833	TRUE	Empty	Isoform 3 of Vesicle-associated membrane protein 7 OS=Homo sapiens OX=9606 GN=VAMP7	sp|P51809-3|VAMP7_HUMAN (+1)		20 kDa		unknown	0	2	1	0
834	TRUE	Empty	Cluster of Dynamin-binding protein OS=Homo sapiens OX=9606 GN=DNMBP PE=1 SV=1 (sp|Q6XZF7|DNMBP_HUMAN)	sp|Q6XZF7|DNMBP_HUMAN [2]		177 kDa	TRUE	unknown	3	2	2	1
834.1	TRUE	Empty	Dynamin-binding protein OS=Homo sapiens OX=9606 GN=DNMBP PE=1 SV=1	sp|Q6XZF7|DNMBP_HUMAN		177 kDa	TRUE	unknown	3	2	2	1
834.2	TRUE	Empty	Dynamin-binding protein OS=Homo sapiens OX=9606 GN=DNMBP PE=1 SV=1	A0A1B0GTX1_HUMAN		138 kDa	TRUE	unknown	0	0	0	0
835	TRUE	Empty	Cluster of U1 small nuclear ribonucleoprotein A OS=Homo sapiens OX=9606 GN=SNRPA PE=1 SV=3 (SNRPA_HUMAN)	SNRPA_HUMAN [2]		31 kDa	TRUE	unknown	0	0	2	2
835.1	TRUE	Empty	U1 small nuclear ribonucleoprotein A OS=Homo sapiens OX=9606 GN=SNRPA PE=1 SV=3	SNRPA_HUMAN		31 kDa	TRUE	unknown	0	0	1	2
835.2	TRUE	Empty	U2 small nuclear ribonucleoprotein B'' OS=Homo sapiens OX=9606 GN=SNRPB2 PE=1 SV=1	RU2B_HUMAN		25 kDa	TRUE	unknown	0	0	1	1
836	TRUE	Empty	Rho family-interacting cell polarization regulator 1 OS=Homo sapiens OX=9606 GN=RIPOR1 PE=1 SV=1	A0A0A0MTL6_HUMAN (+4)		134 kDa		unknown	3	2	1	0
837	TRUE	Empty	Archain 1, isoform CRA_a OS=Homo sapiens OX=9606 GN=ARCN1 PE=1 SV=1	B0YIW6_HUMAN (+1)		62 kDa		unknown	3	4	0	0
838	TRUE	Empty	Cell division cycle 5-like protein OS=Homo sapiens OX=9606 GN=CDC5L PE=1 SV=2	CDC5L_HUMAN		92 kDa		unknown	0	0	3	4
839	TRUE	Empty	Septin-7 OS=Homo sapiens OX=9606 GN=SEPT7 PE=1 SV=2	E7EPK1_HUMAN (+2)		51 kDa		unknown	2	5	0	0
840	TRUE	Empty	EH domain-binding protein 1-like protein 1 OS=Homo sapiens OX=9606 GN=EHBP1L1 PE=1 SV=2	EH1L1_HUMAN		162 kDa		unknown	1	4	1	1
841	TRUE	Empty	Histone H1x OS=Homo sapiens OX=9606 GN=H1FX PE=1 SV=1	H1X_HUMAN		22 kDa		unknown	1	1	3	2
842	TRUE	Empty	E3 ubiquitin-protein ligase MIB1 OS=Homo sapiens OX=9606 GN=MIB1 PE=1 SV=1	MIB1_HUMAN		110 kDa		unknown	3	2	0	2
843	TRUE	Empty	Sentrin-specific protease 3 OS=Homo sapiens OX=9606 GN=SENP3 PE=1 SV=2	SENP3_HUMAN		65 kDa		unknown	2	3	1	0
844	TRUE	Empty	Splicing factor, arginine/serine-rich 19 OS=Homo sapiens OX=9606 GN=SCAF1 PE=1 SV=3	SFR19_HUMAN		139 kDa		unknown	0	0	4	2
845	TRUE	Empty	F-box-like/WD repeat-containing protein TBL1XR1 OS=Homo sapiens OX=9606 GN=TBL1XR1 PE=1 SV=1	TBL1R_HUMAN		56 kDa		unknown	3	2	1	0
846	TRUE	Empty	Isoform 2 of Nck-associated protein 1 OS=Homo sapiens OX=9606 GN=NCKAP1	sp|Q9Y2A7-2|NCKP1_HUMAN (+1)		130 kDa		unknown	1	3	2	1
847	TRUE	Empty	Isoform 2 of Protein FAM98A OS=Homo sapiens OX=9606 GN=FAM98A	sp|Q8NCA5-2|FA98A_HUMAN (+1)		55 kDa		unknown	0	0	3	2
848	TRUE	Empty	UDP-glucuronosyltransferase 1-6 (Fragment) OS=Homo sapiens OX=9606 GN=UGT1A6 PE=1 SV=1	C9JMY5_HUMAN (+2)		22 kDa		unknown	3	3	0	0
849	TRUE	Empty	Isoform 2 of Golgi-specific brefeldin A-resistance guanine nucleotide exchange factor 1 OS=Homo sapiens OX=9606 GN=GBF1	sp|Q92538-2|GBF1_HUMAN (+2)		206 kDa		unknown	3	1	0	2
850	TRUE	Empty	Isoform 2 of ATPase family AAA domain-containing protein 3A OS=Homo sapiens OX=9606 GN=ATAD3A	sp|Q9NVI7-2|ATD3A_HUMAN (+1)		66 kDa		unknown	0	0	0	3
851	TRUE	Empty	Serine/arginine-rich splicing factor 5 OS=Homo sapiens OX=9606 GN=SRSF5 PE=1 SV=1	sp|Q13243|SRSF5_HUMAN		31 kDa		unknown	0	0	5	1
852	TRUE	Empty	Isoform 4 of Dehydrogenase/reductase SDR family member 4 OS=Homo sapiens OX=9606 GN=DHRS4	sp|Q9BTZ2-4|DHRS4_HUMAN (+2)		26 kDa		unknown	1	2	1	2
853	TRUE	Empty	Isoform PML-8 of Protein PML OS=Homo sapiens OX=9606 GN=PML	sp|P29590-3|PML_HUMAN (+1)		90 kDa		unknown	1	2	2	1
854	TRUE	Empty	T-complex protein 1 subunit eta OS=Homo sapiens OX=9606 GN=CCT7 PE=1 SV=2	sp|Q99832|TCPH_HUMAN		59 kDa		unknown	0	0	2	0
855	TRUE	Empty	Isoform 2 of Apoptosis-inducing factor 2 OS=Homo sapiens OX=9606 GN=AIFM2	sp|Q9BRQ8-2|AIFM2_HUMAN (+1)		37 kDa		unknown	1	2	1	1
856	TRUE	Empty	G-protein-coupled receptor family C group 5 member C OS=Homo sapiens OX=9606 GN=GPRC5C PE=1 SV=1	A0A0C4DFY5_HUMAN (+4)		53 kDa		unknown	2	1	0	0
857	TRUE	Empty	Coatomer subunit zeta-1 OS=Homo sapiens OX=9606 GN=COPZ1 PE=1 SV=1	F8VVA7_HUMAN (+2)		22 kDa		unknown	3	1	2	1
858	TRUE	Empty	Autophagy-related protein 9A (Fragment) OS=Homo sapiens OX=9606 GN=ATG9A PE=1 SV=1	H7C152_HUMAN (+2)		27 kDa		unknown	2	2	0	0
859	TRUE	Empty	60S ribosomal protein L27 OS=Homo sapiens OX=9606 GN=RPL27 PE=1 SV=2	RL27_HUMAN		16 kDa		unknown	1	2	2	1
860	TRUE	Empty	Small nuclear ribonucleoprotein Sm D2 OS=Homo sapiens OX=9606 GN=SNRPD2 PE=1 SV=1	sp|P62316|SMD2_HUMAN		14 kDa		unknown	0	1	2	2
861	TRUE	Empty	Prothymosin alpha OS=Homo sapiens OX=9606 GN=PTMA PE=1 SV=1	B8ZZA1_HUMAN (+5)		14 kDa		unknown	3	2	1	1
862	TRUE	Empty	High affinity cationic amino acid transporter 1 OS=Homo sapiens OX=9606 GN=SLC7A1 PE=1 SV=1	CTR1_HUMAN		68 kDa		unknown	2	2	1	2
863	TRUE	Empty	THO complex subunit 4 OS=Homo sapiens OX=9606 GN=ALYREF PE=1 SV=1	E9PB61_HUMAN (+1)		28 kDa		unknown	0	1	3	3
864	TRUE	Empty	Fatty acid 2-hydroxylase OS=Homo sapiens OX=9606 GN=FA2H PE=1 SV=1	FA2H_HUMAN		43 kDa		unknown	2	2	2	1
865	TRUE	Empty	Peptidyl-prolyl cis-trans isomerase FKBP2 OS=Homo sapiens OX=9606 GN=FKBP2 PE=1 SV=2	FKBP2_HUMAN		16 kDa		unknown	1	2	2	2
866	TRUE	Empty	Large neutral amino acids transporter small subunit 1 OS=Homo sapiens OX=9606 GN=SLC7A5 PE=1 SV=2	LAT1_HUMAN		55 kDa		unknown	2	2	1	2
867	TRUE	Empty	40S ribosomal protein S14 OS=Homo sapiens OX=9606 GN=RPS14 PE=1 SV=3	RS14_HUMAN		16 kDa		unknown	1	2	2	2
868	TRUE	Empty	40S ribosomal protein S28 OS=Homo sapiens OX=9606 GN=RPS28 PE=1 SV=1	RS28_HUMAN		8 kDa		unknown	2	1	2	2
869	TRUE	Empty	Torsin-1B OS=Homo sapiens OX=9606 GN=TOR1B PE=1 SV=2	TOR1B_HUMAN		38 kDa		unknown	2	2	1	2
870	TRUE	Empty	Ubiquitin-conjugating enzyme E2 N OS=Homo sapiens OX=9606 GN=UBE2N PE=1 SV=1	UBE2N_HUMAN (+1)		17 kDa		unknown	2	2	2	1
871	TRUE	Empty	Isoform 2 of Farnesyl pyrophosphate synthase OS=Homo sapiens OX=9606 GN=FDPS	sp|P14324-2|FPPS_HUMAN		41 kDa		unknown	1	2	1	2
872	TRUE	Empty	Isoform 2 of Malate dehydrogenase, mitochondrial OS=Homo sapiens OX=9606 GN=MDH2	sp|P40926-2|MDHM_HUMAN (+1)		31 kDa		unknown	0	1	0	2
873	TRUE	Empty	Isoform 3 of Probable hydrolase PNKD OS=Homo sapiens OX=9606 GN=PNKD	sp|Q8N490-3|PNKD_HUMAN (+2)		41 kDa		unknown	1	3	1	1
874	TRUE	Empty	Multiple coagulation factor deficiency protein 2 OS=Homo sapiens OX=9606 GN=MCFD2 PE=1 SV=1	sp|Q8NI22|MCFD2_HUMAN		16 kDa		unknown	1	2	2	0
875	TRUE	Empty	Isoform Short of Ancient ubiquitous protein 1 OS=Homo sapiens OX=9606 GN=AUP1	sp|Q9Y679-2|AUP1_HUMAN (+2)		46 kDa		unknown	1	3	1	1
876	TRUE	Empty	Isoform 4 of E3 ubiquitin-protein ligase UBR2 OS=Homo sapiens OX=9606 GN=UBR2	sp|Q8IWV8-4|UBR2_HUMAN		201 kDa		unknown	1	1	2	2
877	TRUE	Empty	NADH dehydrogenase [ubiquinone] 1 alpha subcomplex assembly factor 2 OS=Homo sapiens OX=9606 GN=NDUFAF2 PE=1 SV=1	NDUF2_HUMAN		20 kDa		unknown	2	0	2	2
878	TRUE	Empty	40S ribosomal protein S15 OS=Homo sapiens OX=9606 GN=RPS15 PE=1 SV=1	A0A0B4J2B4_HUMAN (+2)		14 kDa		unknown	1	2	2	2
879	TRUE	Empty	Splicing factor 3A subunit 1 OS=Homo sapiens OX=9606 GN=SF3A1 PE=1 SV=1	sp|Q15459|SF3A1_HUMAN		89 kDa		unknown	0	0	2	1
880	TRUE	Empty	rRNA 2'-O-methyltransferase fibrillarin OS=Homo sapiens OX=9606 GN=FBL PE=1 SV=2	FBRL_HUMAN (+3)		34 kDa		unknown	0	0	0	2
881	TRUE	Empty	Leucine--tRNA ligase, cytoplasmic OS=Homo sapiens OX=9606 GN=LARS PE=1 SV=2	sp|Q9P2J5|SYLC_HUMAN		134 kDa		unknown	2	0	2	1
882	TRUE	Empty	Isoform 2 of ELAV-like protein 1 OS=Homo sapiens OX=9606 GN=ELAVL1	sp|Q15717-2|ELAV1_HUMAN (+1)		39 kDa		unknown	1	1	1	2
883	TRUE	Empty	AFG3-like protein 2 OS=Homo sapiens OX=9606 GN=AFG3L2 PE=1 SV=2	AFG32_HUMAN		89 kDa		unknown	0	2	1	0
884	TRUE	Empty	Isoform 2 of ATP synthase subunit d, mitochondrial OS=Homo sapiens OX=9606 GN=ATP5H	sp|O75947-2|ATP5H_HUMAN (+1)		16 kDa		unknown	0	1	1	2
885	TRUE	Empty	60S acidic ribosomal protein P1 OS=Homo sapiens OX=9606 GN=RPLP1 PE=1 SV=1	sp|P05386|RLA1_HUMAN		12 kDa	TRUE	unknown	2	2	3	2
886	TRUE	Empty	Cluster of Activator of 90 kDa heat shock protein ATPase homolog 1 OS=Homo sapiens OX=9606 GN=AHSA1 PE=1 SV=1 (sp|O95433|AHSA1_HUMAN)	sp|O95433|AHSA1_HUMAN [2]		38 kDa	TRUE	unknown	2	1	1	1
886.1	TRUE	Empty	Activator of 90 kDa heat shock protein ATPase homolog 1 OS=Homo sapiens OX=9606 GN=AHSA1 PE=1 SV=1	sp|O95433|AHSA1_HUMAN		38 kDa	TRUE	unknown	2	1	1	1
886.2	TRUE	Empty	Activator of 90 kDa heat shock protein ATPase homolog 1 (Fragment) OS=Homo sapiens OX=9606 GN=AHSA1 PE=1 SV=1	H0YJG7_HUMAN		24 kDa	TRUE	unknown	0	0	0	0
887	TRUE	Empty	Cluster of Copine-8 OS=Homo sapiens OX=9606 GN=CPNE8 PE=1 SV=2 (E7ENV7_HUMAN)	E7ENV7_HUMAN [8]		62 kDa	TRUE	unknown	1	3	1	0
887.1	TRUE	Empty	Copine-8 OS=Homo sapiens OX=9606 GN=CPNE8 PE=1 SV=2	E7ENV7_HUMAN (+2)		62 kDa	TRUE	unknown	1	3	1	0
887.2	TRUE	Empty	Isoform 2 of Copine-6 OS=Homo sapiens OX=9606 GN=CPNE6	sp|O95741-2|CPNE6_HUMAN (+1)		68 kDa	TRUE	unknown	0	0	0	0
887.3	TRUE	Empty	Isoform 2 of Copine-4 OS=Homo sapiens OX=9606 GN=CPNE4	sp|Q96A23-2|CPNE4_HUMAN (+1)		64 kDa	TRUE	unknown	0	0	0	0
887.4	TRUE	Empty	Copine-3 OS=Homo sapiens OX=9606 GN=CPNE3 PE=1 SV=1	CPNE3_HUMAN		60 kDa	TRUE	unknown	0	0	0	0
888	TRUE	Empty	Cluster of CCR4-NOT transcription complex subunit 3 OS=Homo sapiens OX=9606 GN=CNOT3 PE=1 SV=1 (CNOT3_HUMAN)	CNOT3_HUMAN [2]		82 kDa	TRUE	unknown	0	2	1	3
888.1	TRUE	Empty	CCR4-NOT transcription complex subunit 3 OS=Homo sapiens OX=9606 GN=CNOT3 PE=1 SV=1	CNOT3_HUMAN		82 kDa	TRUE	unknown	0	2	1	3
888.2	TRUE	Empty	CCR4-NOT transcription complex subunit 3 (Fragment) OS=Homo sapiens OX=9606 GN=CNOT3 PE=1 SV=1	H7C148_HUMAN		39 kDa	TRUE	unknown	0	0	0	0
889	TRUE	Empty	Cluster of Isoform 2 of Adenomatous polyposis coli protein OS=Homo sapiens OX=9606 GN=APC (sp|P25054-2|APC_HUMAN)	sp|P25054-2|APC_HUMAN [3]		300 kDa	TRUE	unknown	0	3	0	0
889.1	TRUE	Empty	Isoform 2 of Adenomatous polyposis coli protein OS=Homo sapiens OX=9606 GN=APC	sp|P25054-2|APC_HUMAN (+1)		300 kDa	TRUE	unknown	0	3	0	0
889.2	TRUE	Empty	Adenomatous polyposis coli protein OS=Homo sapiens OX=9606 GN=APC PE=1 SV=1	E7EMH9_HUMAN		33 kDa	TRUE	unknown	0	0	0	0
890	TRUE	Empty	Proline-, glutamic acid- and leucine-rich protein 1 OS=Homo sapiens OX=9606 GN=PELP1 PE=1 SV=2	C9JFV4_HUMAN (+1)		125 kDa		unknown	2	4	0	0
891	TRUE	Empty	Sn1-specific diacylglycerol lipase beta OS=Homo sapiens OX=9606 GN=DAGLB PE=1 SV=1	E7ET49_HUMAN (+1)		69 kDa		unknown	1	3	0	0
892	TRUE	Empty	Lysophospholipid acyltransferase 5 OS=Homo sapiens OX=9606 GN=LPCAT3 PE=1 SV=1	F5H0M4_HUMAN (+1)		39 kDa		unknown	0	3	1	2
893	TRUE	Empty	KIAA0100, isoform CRA_a OS=Homo sapiens OX=9606 GN=KIAA0100 PE=1 SV=1	K7EQ86_HUMAN (+3)		237 kDa		unknown	3	2	0	1
894	TRUE	Empty	Isoform 2 of Amyloid-like protein 2 OS=Homo sapiens OX=9606 GN=APLP2	sp|Q06481-2|APLP2_HUMAN (+5)		81 kDa	TRUE	unknown	2	4	1	1
895	TRUE	Empty	GPI transamidase component PIG-S OS=Homo sapiens OX=9606 GN=PIGS PE=1 SV=3	sp|Q96S52|PIGS_HUMAN		62 kDa		unknown	1	3	0	2
896	TRUE	Empty	Serine/Arginine-related protein 53 (Fragment) OS=Homo sapiens OX=9606 GN=RSRC1 PE=1 SV=1	H7C5Q0_HUMAN (+2)		24 kDa		unknown	0	0	3	3
897	TRUE	Empty	Importin subunit alpha-1 OS=Homo sapiens OX=9606 GN=KPNA2 PE=1 SV=1	IMA1_HUMAN		58 kDa		unknown	0	3	2	1
898	TRUE	Empty	Isoform 4 of Pyridoxal-dependent decarboxylase domain-containing protein 1 OS=Homo sapiens OX=9606 GN=PDXDC1	sp|Q6P996-4|PDXD1_HUMAN (+2)		84 kDa		unknown	0	3	1	0
899	TRUE	Empty	A-kinase anchor protein 17A OS=Homo sapiens OX=9606 GN=AKAP17A PE=1 SV=2	sp|Q02040|AK17A_HUMAN		81 kDa		unknown	0	0	4	2
900	TRUE	Empty	AP-5 complex subunit zeta-1 OS=Homo sapiens OX=9606 GN=AP5Z1 PE=1 SV=2	sp|O43299|AP5Z1_HUMAN		89 kDa		unknown	1	3	1	1
901	TRUE	Empty	Isoform 2 of Cell cycle control protein 50A OS=Homo sapiens OX=9606 GN=TMEM30A	sp|Q9NV96-2|CC50A_HUMAN (+1)		37 kDa		unknown	2	2	0	1
902	TRUE	Empty	Sodium-coupled neutral amino acid transporter 5 (Fragment) OS=Homo sapiens OX=9606 GN=SLC38A5 PE=1 SV=8	C9JHH7_HUMAN (+5)		24 kDa		unknown	1	2	1	1
903	TRUE	Empty	H/ACA ribonucleoprotein complex subunit 1 OS=Homo sapiens OX=9606 GN=GAR1 PE=1 SV=1	sp|Q9NY12|GAR1_HUMAN		22 kDa		unknown	0	1	2	2
904	TRUE	Empty	Sorting nexin-9 OS=Homo sapiens OX=9606 GN=SNX9 PE=1 SV=1	SNX9_HUMAN		67 kDa		unknown	2	2	0	0
905	TRUE	Empty	Peptidyl-prolyl cis-trans isomerase FKBP4 OS=Homo sapiens OX=9606 GN=FKBP4 PE=1 SV=3	FKBP4_HUMAN		52 kDa		unknown	2	1	2	0
906	TRUE	Empty	Rho GTPase-activating protein 45 OS=Homo sapiens OX=9606 GN=ARHGAP45 PE=1 SV=2	sp|Q92619|HMHA1_HUMAN		125 kDa		unknown	2	2	0	0
907	TRUE	Empty	Isoform 2 of KH domain-containing, RNA-binding, signal transduction-associated protein 1 OS=Homo sapiens OX=9606 GN=KHDRBS1	sp|Q07666-2|KHDR1_HUMAN (+1)		46 kDa	TRUE	unknown	0	1	3	2
908	TRUE	Empty	Ribonucleoprotein PTB-binding 1 OS=Homo sapiens OX=9606 GN=RAVER1 PE=1 SV=1	A0A087WZ13_HUMAN (+1)		78 kDa		unknown	1	2	2	0
909	TRUE	Empty	Rap1 GTPase-activating protein 2 OS=Homo sapiens OX=9606 GN=RAP1GAP2 PE=1 SV=1	A0A1B0GV05_HUMAN (+3)		85 kDa		unknown	2	2	0	0
910	TRUE	Empty	3-ketoacyl-CoA thiolase, peroxisomal OS=Homo sapiens OX=9606 GN=ACAA1 PE=1 SV=1	C9JDE9_HUMAN (+2)		40 kDa		unknown	0	2	2	1
911	TRUE	Empty	Phosphatidate cytidylyltransferase 2 OS=Homo sapiens OX=9606 GN=CDS2 PE=1 SV=1	CDS2_HUMAN		51 kDa		unknown	2	1	1	2
912	TRUE	Empty	Casein kinase II subunit alpha 3 OS=Homo sapiens OX=9606 GN=CSNK2A3 PE=1 SV=2	CSK23_HUMAN (+2)		45 kDa		unknown	0	2	3	1
913	TRUE	Empty	ADP-ribosylation factor GTPase-activating protein 1 (Fragment) OS=Homo sapiens OX=9606 GN=ARFGAP1 PE=1 SV=2	E5RHT6_HUMAN (+6)		27 kDa		unknown	1	0	1	2
914	TRUE	Empty	Uncharacterized protein FAM241A OS=Homo sapiens OX=9606 GN=FAM241A PE=2 SV=2	F241A_HUMAN		15 kDa		unknown	2	2	0	1
915	TRUE	Empty	Mitochondrial fission 1 protein OS=Homo sapiens OX=9606 GN=FIS1 PE=1 SV=2	FIS1_HUMAN		17 kDa		unknown	2	0	0	1
916	TRUE	Empty	Gem-associated protein 4 OS=Homo sapiens OX=9606 GN=GEMIN4 PE=1 SV=2	GEMI4_HUMAN (+1)		120 kDa		unknown	2	1	2	1
917	TRUE	Empty	Protein jagunal homolog 1 OS=Homo sapiens OX=9606 GN=JAGN1 PE=1 SV=1	JAGN1_HUMAN		21 kDa		unknown	2	3	1	0
918	TRUE	Empty	Prostaglandin E synthase 2 OS=Homo sapiens OX=9606 GN=PTGES2 PE=1 SV=1	PGES2_HUMAN (+1)		42 kDa		unknown	0	1	2	2
919	TRUE	Empty	Lysosome-associated membrane glycoprotein 1 OS=Homo sapiens OX=9606 GN=LAMP1 PE=1 SV=3	sp|P11279|LAMP1_HUMAN		45 kDa		unknown	1	2	1	1
920	TRUE	Empty	Cell surface glycoprotein MUC18 OS=Homo sapiens OX=9606 GN=MCAM PE=1 SV=2	sp|P43121|MUC18_HUMAN		72 kDa		unknown	2	1	2	1
921	TRUE	Empty	Isoform 2 of Transmembrane protein 214 OS=Homo sapiens OX=9606 GN=TMEM214	sp|Q6NUQ4-2|TM214_HUMAN (+1)		72 kDa		unknown	1	2	0	0
922	TRUE	Empty	Isoform 1 of Protein POF1B OS=Homo sapiens OX=9606 GN=POF1B	sp|Q8WVV4-1|POF1B_HUMAN (+1)		69 kDa		unknown	1	2	1	0
923	TRUE	Empty	Isoform 2 of Pre-B-cell leukemia transcription factor-interacting protein 1 OS=Homo sapiens OX=9606 GN=PBXIP1	sp|Q96AQ6-2|PBIP1_HUMAN (+1)		78 kDa		unknown	2	1	0	0
924	TRUE	Empty	Chloride channel CLIC-like protein 1 OS=Homo sapiens OX=9606 GN=CLCC1 PE=1 SV=1	sp|Q96S66|CLCC1_HUMAN		62 kDa		unknown	1	2	1	0
925	TRUE	Empty	Isoform 2 of Lipase maturation factor 2 OS=Homo sapiens OX=9606 GN=LMF2	sp|Q9BU23-2|LMF2_HUMAN (+2)		77 kDa		unknown	1	2	1	2
926	TRUE	Empty	Receptor expression-enhancing protein 4 OS=Homo sapiens OX=9606 GN=REEP4 PE=1 SV=1	sp|Q9H6H4|REEP4_HUMAN		29 kDa		unknown	1	2	2	1
927	TRUE	Empty	Isoform 4 of Sphingomyelin phosphodiesterase 4 OS=Homo sapiens OX=9606 GN=SMPD4	sp|Q9NXE4-4|NSMA3_HUMAN		103 kDa		unknown	1	1	1	2
928	TRUE	Empty	Protein sel-1 homolog 1 OS=Homo sapiens OX=9606 GN=SEL1L PE=1 SV=3	sp|Q9UBV2|SE1L1_HUMAN		89 kDa		unknown	1	1	0	2
929	TRUE	Empty	60S ribosomal protein L18a OS=Homo sapiens OX=9606 GN=RPL18A PE=1 SV=1	M0R0P7_HUMAN (+4)		16 kDa		unknown	1	2	2	1
930	TRUE	Empty	Prolactin regulatory element-binding protein OS=Homo sapiens OX=9606 GN=PREB PE=1 SV=2	PREB_HUMAN		45 kDa		unknown	0	1	1	2
931	TRUE	Empty	Ras-related protein Rab-43 OS=Homo sapiens OX=9606 GN=RAB43 PE=1 SV=1	sp|Q86YS6|RAB43_HUMAN		23 kDa	TRUE	unknown	2	4	5	2
932	TRUE	Empty	60S ribosomal protein L36 OS=Homo sapiens OX=9606 GN=RPL36 PE=1 SV=1	J3QSB5_HUMAN (+1)		11 kDa		unknown	0	2	2	2
933	TRUE	Empty	Transmembrane 9 superfamily member OS=Homo sapiens OX=9606 GN=TM9SF1 PE=3 SV=1	E9PJM1_HUMAN (+8)		48 kDa		unknown	2	2	1	1
934	TRUE	Empty	Isoform 2 of Synaptogyrin-2 OS=Homo sapiens OX=9606 GN=SYNGR2	sp|O43760-2|SNG2_HUMAN (+1)		30 kDa		unknown	1	2	2	1
935	TRUE	Empty	Isoform 3 of Apoptosis-inducing factor 1, mitochondrial OS=Homo sapiens OX=9606 GN=AIFM1	sp|O95831-3|AIFM1_HUMAN		66 kDa		unknown	2	2	1	1
936	TRUE	Empty	Structural maintenance of chromosomes protein OS=Homo sapiens OX=9606 GN=SMC4 PE=1 SV=1	E9PD53_HUMAN (+1)		144 kDa		unknown	1	2	1	1
937	TRUE	Empty	Isoform 2 of Nuclear pore complex protein Nup153 OS=Homo sapiens OX=9606 GN=NUP153	sp|P49790-2|NU153_HUMAN (+1)		149 kDa		unknown	2	1	0	0
938	TRUE	Empty	Nuclear pore complex protein Nup88 OS=Homo sapiens OX=9606 GN=NUP88 PE=1 SV=2	NUP88_HUMAN		84 kDa		unknown	2	1	1	1
939	TRUE	Empty	Fatty acyl-CoA reductase 1 OS=Homo sapiens OX=9606 GN=FAR1 PE=1 SV=1	FACR1_HUMAN		59 kDa		unknown	2	1	1	2
940	TRUE	Empty	Cluster of CCR4-NOT transcription complex subunit 11 OS=Homo sapiens OX=9606 GN=CNOT11 PE=1 SV=1 (CNO11_HUMAN)	CNO11_HUMAN [2]		55 kDa	TRUE	unknown	1	1	3	1
940.1	TRUE	Empty	CCR4-NOT transcription complex subunit 11 OS=Homo sapiens OX=9606 GN=CNOT11 PE=1 SV=1	CNO11_HUMAN		55 kDa	TRUE	unknown	1	1	3	1
940.2	TRUE	Empty	CCR4-NOT transcription complex subunit 11 (Fragment) OS=Homo sapiens OX=9606 GN=CNOT11 PE=1 SV=1	H7C0C7_HUMAN		14 kDa	TRUE	unknown	0	0	0	0
941	TRUE	Empty	Cluster of Isoform 2 of Pyruvate dehydrogenase E1 component subunit beta, mitochondrial OS=Homo sapiens OX=9606 GN=PDHB (sp|P11177-2|ODPB_HUMAN)	sp|P11177-2|ODPB_HUMAN [4]		37 kDa	TRUE	unknown	1	0	0	2
941.1	TRUE	Empty	Isoform 2 of Pyruvate dehydrogenase E1 component subunit beta, mitochondrial OS=Homo sapiens OX=9606 GN=PDHB	sp|P11177-2|ODPB_HUMAN (+2)		37 kDa	TRUE	unknown	1	0	0	2
941.2	TRUE	Empty	Pyruvate dehydrogenase E1 component subunit beta, mitochondrial OS=Homo sapiens OX=9606 GN=PDHB PE=1 SV=1	C9J634_HUMAN		38 kDa	TRUE	unknown	0	0	0	0
942	TRUE	Empty	Cluster of Isoform 2 of 26S proteasome non-ATPase regulatory subunit 13 OS=Homo sapiens OX=9606 GN=PSMD13 (sp|Q9UNM6-2|PSD13_HUMAN)	sp|Q9UNM6-2|PSD13_HUMAN [3]		43 kDa	TRUE	unknown	2	0	1	2
942.1	TRUE	Empty	Isoform 2 of 26S proteasome non-ATPase regulatory subunit 13 OS=Homo sapiens OX=9606 GN=PSMD13	sp|Q9UNM6-2|PSD13_HUMAN (+1)		43 kDa	TRUE	unknown	2	0	1	2
942.2	TRUE	Empty	26S proteasome non-ATPase regulatory subunit 13 (Fragment) OS=Homo sapiens OX=9606 GN=PSMD13 PE=1 SV=1	H0YD73_HUMAN		25 kDa	TRUE	unknown	0	0	0	0
943	TRUE	Empty	Cluster of Isoform 2 of Casein kinase I isoform alpha OS=Homo sapiens OX=9606 GN=CSNK1A1 (sp|P48729-2|KC1A_HUMAN)	sp|P48729-2|KC1A_HUMAN [3]		42 kDa	TRUE	unknown	0	3	1	1
943.1	TRUE	Empty	Isoform 2 of Casein kinase I isoform alpha OS=Homo sapiens OX=9606 GN=CSNK1A1	sp|P48729-2|KC1A_HUMAN (+1)		42 kDa	TRUE	unknown	0	3	1	1
943.2	TRUE	Empty	Casein kinase I isoform alpha-like OS=Homo sapiens OX=9606 GN=CSNK1A1L PE=2 SV=2	KC1AL_HUMAN		39 kDa	TRUE	unknown	0	0	0	0
944	TRUE	Empty	Cluster of Tropomyosin alpha-3 chain OS=Homo sapiens OX=9606 GN=TPM3 PE=1 SV=1 (A0A087WWU8_HUMAN)	A0A087WWU8_HUMAN [12]		26 kDa	TRUE	unknown	0	0	2	2
944.1	TRUE	Empty	Tropomyosin alpha-3 chain OS=Homo sapiens OX=9606 GN=TPM3 PE=1 SV=1	A0A087WWU8_HUMAN (+6)		26 kDa	TRUE	unknown	0	0	2	2
944.2	TRUE	Empty	Tropomyosin alpha-4 chain (Fragment) OS=Homo sapiens OX=9606 GN=TPM4 PE=1 SV=1	K7ENT6_HUMAN (+4)		21 kDa	TRUE	unknown	0	0	0	0
945	TRUE	Empty	Cluster of Alpha-aminoadipic semialdehyde dehydrogenase OS=Homo sapiens OX=9606 GN=ALDH7A1 PE=1 SV=1 (A0A0J9YWF7_HUMAN)	A0A0J9YWF7_HUMAN [11]		32 kDa	TRUE	unknown	2	2	0	0
945.1	TRUE	Empty	Alpha-aminoadipic semialdehyde dehydrogenase OS=Homo sapiens OX=9606 GN=ALDH7A1 PE=1 SV=1	A0A0J9YWF7_HUMAN (+9)		32 kDa	TRUE	unknown	2	2	0	0
945.2	TRUE	Empty	Alpha-aminoadipic semialdehyde dehydrogenase (Fragment) OS=Homo sapiens OX=9606 GN=ALDH7A1 PE=1 SV=1	A0A1B0GUY0_HUMAN		38 kDa	TRUE	unknown	0	0	0	0
946	TRUE	Empty	Splicing factor 45 OS=Homo sapiens OX=9606 GN=RBM17 PE=1 SV=1	SPF45_HUMAN		45 kDa		unknown	0	0	3	1
947	TRUE	Empty	Isoform 5 of Splicing factor 1 OS=Homo sapiens OX=9606 GN=SF1	sp|Q15637-5|SF01_HUMAN		72 kDa		unknown	0	0	3	2
948	TRUE	Empty	Isoform 4 of Brain-specific angiogenesis inhibitor 1-associated protein 2 OS=Homo sapiens OX=9606 GN=BAIAP2	sp|Q9UQB8-4|BAIP2_HUMAN (+1)		57 kDa		unknown	1	4	0	0
949	TRUE	Empty	Isoform Heart of ATP synthase subunit gamma, mitochondrial OS=Homo sapiens OX=9606 GN=ATP5F1C	sp|P36542-2|ATPG_HUMAN (+1)		33 kDa		unknown	0	1	1	3
950	TRUE	Empty	Isoform 2 of Interleukin enhancer-binding factor 3 OS=Homo sapiens OX=9606 GN=ILF3	sp|Q12906-2|ILF3_HUMAN (+6)		76 kDa		unknown	1	0	1	3
951	TRUE	Empty	3-hydroxyacyl-CoA dehydrogenase type-2 OS=Homo sapiens OX=9606 GN=HSD17B10 PE=1 SV=3	sp|Q99714|HCD2_HUMAN		27 kDa		unknown	1	1	0	3
952	TRUE	Empty	Isoform 4 of FYVE and coiled-coil domain-containing protein 1 OS=Homo sapiens OX=9606 GN=FYCO1	sp|Q9BQS8-4|FYCO1_HUMAN (+1)		169 kDa		unknown	1	4	0	0
953	TRUE	Empty	Cation-dependent mannose-6-phosphate receptor OS=Homo sapiens OX=9606 GN=M6PR PE=1 SV=1	MPRD_HUMAN		31 kDa		unknown	2	1	0	0
954	TRUE	Empty	Peptidyl-prolyl cis-trans isomerase FKBP10 OS=Homo sapiens OX=9606 GN=FKBP10 PE=1 SV=1	sp|Q96AY3|FKB10_HUMAN		64 kDa		unknown	3	0	0	0
955	TRUE	Empty	Isoform 3 of Glutamate dehydrogenase 1, mitochondrial OS=Homo sapiens OX=9606 GN=GLUD1	sp|P00367-3|DHE3_HUMAN (+1)		47 kDa		unknown	0	2	0	3
956	TRUE	Empty	NADH dehydrogenase [ubiquinone] 1 alpha subcomplex subunit 8 OS=Homo sapiens OX=9606 GN=NDUFA8 PE=1 SV=3	NDUA8_HUMAN		20 kDa		unknown	0	0	3	2
957	TRUE	Empty	Nuclear pore complex protein Nup205 OS=Homo sapiens OX=9606 GN=NUP205 PE=1 SV=3	NU205_HUMAN		228 kDa		unknown	2	1	0	1
958	TRUE	Empty	Isoform 5 of Proline-rich protein 5 OS=Homo sapiens OX=9606 GN=PRR5	sp|P85299-5|PRR5_HUMAN (+1)		45 kDa	TRUE	unknown	2	1	0	0
959	TRUE	Empty	Endophilin-B1 OS=Homo sapiens OX=9606 GN=SH3GLB1 PE=1 SV=1	A0A087WW40_HUMAN (+2)		44 kDa		unknown	0	0	1	3
960	TRUE	Empty	Regulator of microtubule dynamics protein 3 OS=Homo sapiens OX=9606 GN=RMDN3 PE=1 SV=2	sp|Q96TC7|RMD3_HUMAN		52 kDa		unknown	2	2	0	0
961	TRUE	Empty	C-Maf-inducing protein OS=Homo sapiens OX=9606 GN=CMIP PE=1 SV=1	A0A087WU05_HUMAN (+4)		65 kDa		unknown	0	1	2	2
962	TRUE	Empty	Selenoprotein S OS=Homo sapiens OX=9606 GN=SELENOS PE=1 SV=1	A0A182DWI4_HUMAN (+2)		18 kDa		unknown	2	1	0	1
963	TRUE	Empty	Cytochrome c oxidase subunit 7A2, mitochondrial OS=Homo sapiens OX=9606 GN=COX7A2 PE=1 SV=1	CX7A2_HUMAN (+3)		9 kDa		unknown	2	1	1	1
964	TRUE	Empty	Eukaryotic translation initiation factor 3 subunit I OS=Homo sapiens OX=9606 GN=EIF3I PE=1 SV=1	EIF3I_HUMAN		37 kDa		unknown	1	1	2	1
965	TRUE	Empty	Hsc70-interacting protein OS=Homo sapiens OX=9606 GN=ST13 PE=1 SV=2	F10A1_HUMAN (+4)		41 kDa		unknown	1	0	2	2
966	TRUE	Empty	Histone H1.2 OS=Homo sapiens OX=9606 GN=HIST1H1C PE=1 SV=2	H12_HUMAN (+2)		21 kDa		unknown	0	1	2	2
967	TRUE	Empty	SRSF protein kinase 1 (Fragment) OS=Homo sapiens OX=9606 GN=SRPK1 PE=1 SV=1	H3BLV9_HUMAN (+3)		76 kDa	TRUE	unknown	0	0	2	2
968	TRUE	Empty	Voltage-dependent anion-selective channel protein 1 OS=Homo sapiens OX=9606 GN=VDAC1 PE=1 SV=2	VDAC1_HUMAN		31 kDa		unknown	2	2	0	0
969	TRUE	Empty	NADH dehydrogenase [ubiquinone] iron-sulfur protein 3, mitochondrial OS=Homo sapiens OX=9606 GN=NDUFS3 PE=1 SV=1	sp|O75489|NDUS3_HUMAN		30 kDa		unknown	2	1	1	1
970	TRUE	Empty	Isoform 2 of CD97 antigen OS=Homo sapiens OX=9606 GN=CD97	sp|P48960-2|CD97_HUMAN		82 kDa		unknown	0	2	0	2
971	TRUE	Empty	Isoform 2 of Small nuclear ribonucleoprotein Sm D3 OS=Homo sapiens OX=9606 GN=SNRPD3	sp|P62318-2|SMD3_HUMAN (+1)		13 kDa		unknown	1	0	1	3
972	TRUE	Empty	Isoform 2 of Maternal embryonic leucine zipper kinase OS=Homo sapiens OX=9606 GN=MELK	sp|Q14680-2|MELK_HUMAN (+3)		66 kDa		unknown	2	1	0	0
973	TRUE	Empty	Ras-related protein Rab-17 OS=Homo sapiens OX=9606 GN=RAB17 PE=1 SV=2	sp|Q9H0T7|RAB17_HUMAN		23 kDa		unknown	3	1	1	0
974	TRUE	Empty	Isoform 4 of Transmembrane protein 245 OS=Homo sapiens OX=9606 GN=TMEM245	sp|Q9H330-4|TM245_HUMAN (+1)		55 kDa		unknown	1	2	1	1
975	TRUE	Empty	Isoform 1 of SH2 domain-containing protein 2A OS=Homo sapiens OX=9606 GN=SH2D2A	sp|Q9NP31-2|SH22A_HUMAN (+3)		44 kDa		unknown	1	2	1	1
976	TRUE	Empty	Isoform 2 of Ragulator complex protein LAMTOR3 OS=Homo sapiens OX=9606 GN=LAMTOR3	sp|Q9UHA4-2|LTOR3_HUMAN (+1)		13 kDa		unknown	0	2	0	2
977	TRUE	Empty	Protein transport protein Sec23A OS=Homo sapiens OX=9606 GN=SEC23A PE=1 SV=1	F5H365_HUMAN (+1)		83 kDa		unknown	1	1	2	1
978	TRUE	Empty	Isoform 2 of Ragulator complex protein LAMTOR2 OS=Homo sapiens OX=9606 GN=LAMTOR2	sp|Q9Y2Q5-2|LTOR2_HUMAN (+1)		16 kDa		unknown	1	0	2	1
979	TRUE	Empty	Putative RNA-binding protein 15 OS=Homo sapiens OX=9606 GN=RBM15 PE=1 SV=1	A0A087WWP4_HUMAN (+4)		102 kDa		unknown	0	0	3	2
980	TRUE	Empty	Isoform 2 of 45 kDa calcium-binding protein OS=Homo sapiens OX=9606 GN=SDF4	sp|Q9BRK5-2|CAB45_HUMAN (+2)		30 kDa		unknown	3	1	1	0
981	TRUE	Empty	Cytoplasmic dynein 1 light intermediate chain 2 (Fragment) OS=Homo sapiens OX=9606 GN=DYNC1LI2 PE=1 SV=1	J3KRI4_HUMAN (+1)		18 kDa		unknown	1	2	1	1
982	TRUE	Empty	Gamma-tubulin complex component OS=Homo sapiens OX=9606 GN=TUBGCP2 PE=1 SV=1	F2Z2B9_HUMAN (+3)		83 kDa		unknown	0	2	1	1
983	TRUE	Empty	40S ribosomal protein S23 OS=Homo sapiens OX=9606 GN=RPS23 PE=1 SV=1	D6RD47_HUMAN (+1)		15 kDa		unknown	0	1	2	2
984	TRUE	Empty	Derlin-2 OS=Homo sapiens OX=9606 GN=DERL2 PE=1 SV=1	DERL2_HUMAN (+2)		28 kDa		unknown	1	2	0	1
985	TRUE	Empty	Isoform 2 of S-adenosylhomocysteine hydrolase-like protein 1 OS=Homo sapiens OX=9606 GN=AHCYL1	sp|O43865-2|SAHH2_HUMAN (+1)		54 kDa		unknown	2	2	0	0
986	TRUE	Empty	Vacuolar protein sorting-associated protein 35 OS=Homo sapiens OX=9606 GN=VPS35 PE=1 SV=2	VPS35_HUMAN		92 kDa		unknown	1	2	0	0
987	TRUE	Empty	60S ribosomal protein L29 OS=Homo sapiens OX=9606 GN=RPL29 PE=1 SV=2	RL29_HUMAN		18 kDa		unknown	1	1	2	1
988	TRUE	Empty	FLYWCH family member 2 OS=Homo sapiens OX=9606 GN=FLYWCH2 PE=1 SV=1	FWCH2_HUMAN (+1)		15 kDa		unknown	1	2	0	0
989	TRUE	Empty	Cystatin-C OS=Homo sapiens OX=9606 GN=CST3 PE=1 SV=1	CYTC_HUMAN		16 kDa		unknown	2	1	1	1
990	TRUE	Empty	Alpha-1,3-mannosyl-glycoprotein 2-beta-N-acetylglucosaminyltransferase OS=Homo sapiens OX=9606 GN=MGAT1 PE=1 SV=2	MGAT1_HUMAN		51 kDa		unknown	1	1	2	1
991	TRUE	Empty	CD59 glycoprotein OS=Homo sapiens OX=9606 GN=CD59 PE=1 SV=1	E9PR17_HUMAN		15 kDa		unknown	1	1	1	2
992	TRUE	Empty	Isoform 2 of La-related protein 1 OS=Homo sapiens OX=9606 GN=LARP1	sp|Q6PKG0-3|LARP1_HUMAN (+1)		116 kDa		unknown	1	2	1	1
993	TRUE	Empty	Heterogeneous nuclear ribonucleoprotein F OS=Homo sapiens OX=9606 GN=HNRNPF PE=1 SV=3	HNRPF_HUMAN		46 kDa	TRUE	unknown	3	2	2	1
994	TRUE	Empty	60S ribosomal protein L36a OS=Homo sapiens OX=9606 GN=RPL36A PE=3 SV=2	H0Y5B4_HUMAN (+4)		13 kDa		unknown	1	1	2	1
995	TRUE	Empty	40S ribosomal protein S7 OS=Homo sapiens OX=9606 GN=RPS7 PE=1 SV=1	RS7_HUMAN		22 kDa		unknown	0	0	2	1
996	TRUE	Empty	Isoform 2 of Macrophage-capping protein OS=Homo sapiens OX=9606 GN=CAPG	sp|P40121-2|CAPG_HUMAN (+1)		37 kDa		unknown	0	1	1	2
997	TRUE	Empty	Vesicle transport through interaction with t-SNAREs homolog 1B OS=Homo sapiens OX=9606 GN=VTI1B PE=1 SV=3	sp|Q9UEU0|VTI1B_HUMAN		27 kDa		unknown	3	1	0	0
998	TRUE	Empty	Isoform 2 of Dedicator of cytokinesis protein 7 OS=Homo sapiens OX=9606 GN=DOCK7	sp|Q96N67-2|DOCK7_HUMAN (+5)		241 kDa		unknown	0	2	0	0
999	TRUE	Empty	Isoform 2 of Neural cell adhesion molecule L1 OS=Homo sapiens OX=9606 GN=L1CAM	sp|P32004-2|L1CAM_HUMAN (+2)		140 kDa		unknown	0	2	1	2
1000	TRUE	Empty	Malate dehydrogenase, cytoplasmic OS=Homo sapiens OX=9606 GN=MDH1 PE=1 SV=1	B8ZZ51_HUMAN (+4)		19 kDa		unknown	1	1	1	2
1001	TRUE	Empty	Kinetochore-associated protein NSL1 homolog OS=Homo sapiens OX=9606 GN=NSL1 PE=1 SV=3	sp|Q96IY1|NSL1_HUMAN		32 kDa		unknown	0	0	1	2
1002	TRUE	Empty	Retinol dehydrogenase 13 OS=Homo sapiens OX=9606 GN=RDH13 PE=1 SV=2	sp|Q8NBN7|RDH13_HUMAN		36 kDa		unknown	1	2	1	1
1003	TRUE	Empty	60S ribosomal protein L22 (Fragment) OS=Homo sapiens OX=9606 GN=RPL22 PE=1 SV=1	K7EJT5_HUMAN (+5)		5 kDa		unknown	1	2	1	1
1004	TRUE	Empty	Trifunctional enzyme subunit beta, mitochondrial OS=Homo sapiens OX=9606 GN=HADHB PE=1 SV=1	F5GZQ3_HUMAN (+2)		50 kDa		unknown	0	1	2	1
1005	TRUE	Empty	Isoform A of Syntaxin-16 OS=Homo sapiens OX=9606 GN=STX16	sp|O14662-2|STX16_HUMAN		35 kDa		unknown	2	1	0	1
1006	TRUE	Empty	Isoform 2 of Protein disulfide-isomerase A5 OS=Homo sapiens OX=9606 GN=PDIA5	sp|Q14554-2|PDIA5_HUMAN (+1)		30 kDa		unknown	1	0	0	2
1007	TRUE	Empty	ATP synthase F(0) complex subunit B1, mitochondrial OS=Homo sapiens OX=9606 GN=ATP5F1 PE=1 SV=2	AT5F1_HUMAN		29 kDa		unknown	0	2	0	2
1008	TRUE	Empty	Ras-related protein Rab-12 OS=Homo sapiens OX=9606 GN=RAB12 PE=1 SV=3	RAB12_HUMAN		27 kDa	TRUE	unknown	2	3	4	2
1009	TRUE	Empty	Isoform 2 of Protein numb homolog OS=Homo sapiens OX=9606 GN=NUMB	sp|P49757-2|NUMB_HUMAN (+3)		66 kDa		unknown	1	1	2	0
1010	TRUE	Empty	Insulin receptor substrate 2 OS=Homo sapiens OX=9606 GN=IRS2 PE=1 SV=2	IRS2_HUMAN		137 kDa		unknown	1	2	1	1
1011	TRUE	Empty	Cluster of Surfeit 4, isoform CRA_b OS=Homo sapiens OX=9606 GN=SURF4 PE=1 SV=1 (B7Z1G8_HUMAN)	B7Z1G8_HUMAN [3]		25 kDa	TRUE	unknown	1	2	1	1
1011.1	TRUE	Empty	Surfeit 4, isoform CRA_b OS=Homo sapiens OX=9606 GN=SURF4 PE=1 SV=1	B7Z1G8_HUMAN		25 kDa	TRUE	unknown	1	2	1	1
1011.2	TRUE	Empty	Surfeit 4 OS=Homo sapiens OX=9606 GN=SURF4 PE=1 SV=1	Q5T8U5_HUMAN (+1)		21 kDa	TRUE	unknown	0	0	0	0
1012	TRUE	Empty	SPRY domain-containing protein 4 OS=Homo sapiens OX=9606 GN=SPRYD4 PE=1 SV=2	SPRY4_HUMAN		23 kDa		unknown	1	3	0	0
1013	TRUE	Empty	Isoform 2 of Rho GTPase-activating protein 26 OS=Homo sapiens OX=9606 GN=ARHGAP26	sp|Q9UNA1-2|RHG26_HUMAN (+1)		86 kDa		unknown	1	3	0	0
1014	TRUE	Empty	ER membrane protein complex subunit 7 OS=Homo sapiens OX=9606 GN=EMC7 PE=1 SV=1	EMC7_HUMAN		26 kDa		unknown	0	1	0	3
1015	TRUE	Empty	Isoform 2 of Centromere/kinetochore protein zw10 homolog OS=Homo sapiens OX=9606 GN=ZW10	sp|O43264-2|ZW10_HUMAN (+1)		77 kDa		unknown	3	0	0	0
1016	TRUE	Empty	Isoform 4 of ATP-dependent DNA helicase Q5 OS=Homo sapiens OX=9606 GN=RECQL5	sp|O94762-4|RECQ5_HUMAN (+1)		106 kDa		unknown	1	2	0	0
1017	TRUE	Empty	Isoform 2 of Scaffold attachment factor B1 OS=Homo sapiens OX=9606 GN=SAFB	sp|Q15424-2|SAFB1_HUMAN (+3)		95 kDa	TRUE	unknown	0	0	3	2
1018	TRUE	Empty	Phosphoglycerate mutase 1 OS=Homo sapiens OX=9606 GN=PGAM1 PE=1 SV=2	PGAM1_HUMAN		29 kDa		unknown	0	0	2	1
1019	TRUE	Empty	Isoform 2 of Pre-mRNA-splicing factor 38B OS=Homo sapiens OX=9606 GN=PRPF38B	sp|Q5VTL8-2|PR38B_HUMAN (+1)		21 kDa		unknown	0	0	2	0
1020	TRUE	Empty	Transmembrane 9 superfamily member OS=Homo sapiens OX=9606 GN=TM9SF4 PE=1 SV=1	A0A0C4DFM1_HUMAN (+1)		73 kDa		unknown	0	2	1	1
1021	TRUE	Empty	Eukaryotic translation initiation factor 3 subunit L OS=Homo sapiens OX=9606 GN=EIF3L PE=1 SV=1	B0QY89_HUMAN (+2)		71 kDa		unknown	1	1	0	2
1022	TRUE	Empty	Interleukin enhancer-binding factor 2 OS=Homo sapiens OX=9606 GN=ILF2 PE=1 SV=1	B4DY09_HUMAN (+1)		39 kDa		unknown	1	0	2	1
1023	TRUE	Empty	DNA polymerase-transactivated protein 6, isoform CRA_b OS=Homo sapiens OX=9606 GN=SPATS2L PE=1 SV=1	B8ZZZ7_HUMAN (+4)		55 kDa		unknown	2	1	1	0
1024	TRUE	Empty	Cilia- and flagella-associated protein 20 OS=Homo sapiens OX=9606 GN=CFAP20 PE=1 SV=1	CFA20_HUMAN		23 kDa		unknown	0	0	2	2
1025	TRUE	Empty	Golgi resident protein GCP60 OS=Homo sapiens OX=9606 GN=ACBD3 PE=1 SV=4	GCP60_HUMAN		61 kDa		unknown	2	1	0	1
1026	TRUE	Empty	Acetyltransferase component of pyruvate dehydrogenase complex (Fragment) OS=Homo sapiens OX=9606 GN=DLAT PE=1 SV=1	H0YDD4_HUMAN (+1)		51 kDa		unknown	1	1	0	2
1027	TRUE	Empty	Mitotic spindle-associated MMXD complex subunit MIP18 (Fragment) OS=Homo sapiens OX=9606 GN=FAM96B PE=1 SV=1	H3BNV7_HUMAN (+1)		18 kDa		unknown	2	0	0	1
1028	TRUE	Empty	Nuclear pore complex protein Nup85 OS=Homo sapiens OX=9606 GN=NUP85 PE=1 SV=1	J3QL54_HUMAN (+4)		62 kDa		unknown	1	2	0	0
1029	TRUE	Empty	Poly [ADP-ribose] polymerase 1 OS=Homo sapiens OX=9606 GN=PARP1 PE=1 SV=4	PARP1_HUMAN		113 kDa		unknown	2	1	0	1
1030	TRUE	Empty	Peroxisomal membrane protein PEX13 OS=Homo sapiens OX=9606 GN=PEX13 PE=1 SV=2	PEX13_HUMAN		44 kDa		unknown	2	1	1	0
1031	TRUE	Empty	Rab3 GTPase-activating protein non-catalytic subunit OS=Homo sapiens OX=9606 GN=RAB3GAP2 PE=1 SV=1	RBGPR_HUMAN		156 kDa		unknown	1	2	0	1
1032	TRUE	Empty	U2 small nuclear ribonucleoprotein A' OS=Homo sapiens OX=9606 GN=SNRPA1 PE=1 SV=2	RU2A_HUMAN		28 kDa		unknown	0	0	2	2
1033	TRUE	Empty	Sphingosine-1-phosphate phosphatase 1 OS=Homo sapiens OX=9606 GN=SGPP1 PE=1 SV=2	SGPP1_HUMAN		49 kDa		unknown	1	2	0	1
1034	TRUE	Empty	Smad nuclear-interacting protein 1 OS=Homo sapiens OX=9606 GN=SNIP1 PE=1 SV=1	SNIP1_HUMAN		46 kDa		unknown	0	0	2	2
1035	TRUE	Empty	Isoform 2 of Alpha-1,3/1,6-mannosyltransferase ALG2 OS=Homo sapiens OX=9606 GN=ALG2	sp|Q9H553-2|ALG2_HUMAN (+1)		37 kDa		unknown	2	1	0	0
1036	TRUE	Empty	Phenylalanine--tRNA ligase alpha subunit OS=Homo sapiens OX=9606 GN=FARSA PE=1 SV=1	K7ER00_HUMAN (+2)		62 kDa		unknown	2	0	1	1
1037	TRUE	Empty	Signal peptidase complex subunit 3 OS=Homo sapiens OX=9606 GN=SPCS3 PE=1 SV=1	SPCS3_HUMAN		20 kDa		unknown	1	2	0	1
1038	TRUE	Empty	Isoform 2 of CCR4-NOT transcription complex subunit 9 OS=Homo sapiens OX=9606 GN=CNOT9	sp|Q92600-2|CNOT9_HUMAN (+1)		37 kDa		unknown	0	2	2	0
1039	TRUE	Empty	Pre-mRNA-splicing factor SYF1 OS=Homo sapiens OX=9606 GN=XAB2 PE=1 SV=2	SYF1_HUMAN		100 kDa		unknown	0	0	1	2
1040	TRUE	Empty	Rho guanine nucleotide exchange factor 1 OS=Homo sapiens OX=9606 GN=ARHGEF1 PE=1 SV=1	M0QZR4_HUMAN (+3)		108 kDa		unknown	2	1	0	0
1041	TRUE	Empty	Cysteine and histidine-rich domain-containing protein 1 OS=Homo sapiens OX=9606 GN=CHORDC1 PE=1 SV=1	E9PPQ5_HUMAN (+2)		21 kDa		unknown	1	2	0	0
1042	TRUE	Empty	Methyltransferase-like protein 7B OS=Homo sapiens OX=9606 GN=METTL7B PE=1 SV=1	A0A087WZT2_HUMAN (+1)		31 kDa		unknown	0	2	0	0
1043	TRUE	Empty	Ras-related protein Rab-33B OS=Homo sapiens OX=9606 GN=RAB33B PE=1 SV=1	RB33B_HUMAN		26 kDa		unknown	3	3	4	0
1044	TRUE	Empty	ElaC homolog 2 (E. coli), isoform CRA_a OS=Homo sapiens OX=9606 GN=ELAC2 PE=1 SV=1	G5E9D5_HUMAN		90 kDa		unknown	2	1	0	1
1045	TRUE	Empty	Uncharacterized protein (Fragment) OS=Homo sapiens OX=9606 PE=4 SV=1	E9PLN8_HUMAN (+5)		18 kDa		unknown	0	1	1	2
1046	TRUE	Empty	Isoform 2 of WAS/WASL-interacting protein family member 2 OS=Homo sapiens OX=9606 GN=WIPF2	sp|Q8TF74-2|WIPF2_HUMAN (+1)		31 kDa		unknown	2	2	0	0
1047	TRUE	Empty	Cytoplasmic dynein 1 light intermediate chain 1 OS=Homo sapiens OX=9606 GN=DYNC1LI1 PE=1 SV=3	DC1L1_HUMAN (+1)		57 kDa		unknown	1	1	0	2
1048	TRUE	Empty	Keratin, type II cytoskeletal 1b OS=Homo sapiens OX=9606 GN=KRT77 PE=1 SV=3	K2C1B_HUMAN		62 kDa	TRUE	unknown	0	2	2	3
1049	TRUE	Empty	Protein C19orf12 (Fragment) OS=Homo sapiens OX=9606 GN=C19orf12 PE=1 SV=1	K7EPS8_HUMAN (+1)		11 kDa		unknown	1	1	2	0
1050	TRUE	Empty	Pre-mRNA-splicing factor CWC22 homolog (Fragment) OS=Homo sapiens OX=9606 GN=CWC22 PE=1 SV=1	B7WP74_HUMAN (+1)		86 kDa		unknown	0	0	1	2
1051	TRUE	Empty	RNA-binding protein PNO1 OS=Homo sapiens OX=9606 GN=PNO1 PE=1 SV=1	PNO1_HUMAN		28 kDa		unknown	0	2	0	1
1052	TRUE	Empty	Peroxiredoxin-2 OS=Homo sapiens OX=9606 GN=PRDX2 PE=1 SV=5	PRDX2_HUMAN		22 kDa	TRUE	unknown	1	2	2	2
1053	TRUE	Empty	Importin-8 OS=Homo sapiens OX=9606 GN=IPO8 PE=1 SV=2	sp|O15397|IPO8_HUMAN		120 kDa	TRUE	unknown	3	0	1	1
1054	TRUE	Empty	Splicing factor 3B subunit 6 OS=Homo sapiens OX=9606 GN=SF3B6 PE=1 SV=1	SF3B6_HUMAN		15 kDa		unknown	0	0	1	2
1055	TRUE	Empty	Protein S100-A4 OS=Homo sapiens OX=9606 GN=S100A4 PE=1 SV=1	S10A4_HUMAN		12 kDa		unknown	0	0	2	0
1056	TRUE	Empty	Isoform 1 of Protein PRRC2B OS=Homo sapiens OX=9606 GN=PRRC2B	sp|Q5JSZ5-5|PRC2B_HUMAN (+1)		166 kDa	TRUE	unknown	1	1	2	0
1057	TRUE	Empty	Cluster of Basic leucine zipper and W2 domain-containing protein 2 (Fragment) OS=Homo sapiens OX=9606 GN=BZW2 PE=1 SV=1 (E7ETZ4_HUMAN)	E7ETZ4_HUMAN [4]		47 kDa	TRUE	unknown	1	2	1	0
1057.1	TRUE	Empty	Basic leucine zipper and W2 domain-containing protein 2 (Fragment) OS=Homo sapiens OX=9606 GN=BZW2 PE=1 SV=1	E7ETZ4_HUMAN (+2)		47 kDa	TRUE	unknown	1	2	1	0
1057.2	TRUE	Empty	Basic leucine zipper and W2 domain-containing protein 2 OS=Homo sapiens OX=9606 GN=BZW2 PE=1 SV=1	B5MCE7_HUMAN		26 kDa	TRUE	unknown	0	0	0	0
1058	TRUE	Empty	Cluster of Target of rapamycin complex subunit LST8 OS=Homo sapiens OX=9606 GN=MLST8 PE=1 SV=1 (sp|Q9BVC4|LST8_HUMAN)	sp|Q9BVC4|LST8_HUMAN [2]		36 kDa	TRUE	unknown	2	2	0	0
1058.1	TRUE	Empty	Target of rapamycin complex subunit LST8 OS=Homo sapiens OX=9606 GN=MLST8 PE=1 SV=1	sp|Q9BVC4|LST8_HUMAN		36 kDa	TRUE	unknown	2	2	0	0
1058.2	TRUE	Empty	Isoform 3 of Target of rapamycin complex subunit LST8 OS=Homo sapiens OX=9606 GN=MLST8	sp|Q9BVC4-4|LST8_HUMAN		24 kDa	TRUE	unknown	0	0	0	0
1059	TRUE	Empty	Transketolase OS=Homo sapiens OX=9606 GN=TKT PE=1 SV=1	A0A0B4J1R6_HUMAN		50 kDa		unknown	0	0	3	0
1060	TRUE	Empty	Isoform 4 of Serine/threonine-protein phosphatase 2A 56 kDa regulatory subunit gamma isoform OS=Homo sapiens OX=9606 GN=PPP2R5C	sp|Q13362-4|2A5G_HUMAN		63 kDa	TRUE	unknown	0	2	0	0
1061	TRUE	Empty	alpha-1,2-Mannosidase OS=Homo sapiens OX=9606 GN=MAN1B1 PE=1 SV=2	H0YG20_HUMAN (+2)		79 kDa		unknown	0	2	0	0
1062	TRUE	Empty	Isoform 2 of Serine/arginine-rich splicing factor 8 OS=Homo sapiens OX=9606 GN=SRSF8	sp|Q9BRL6-2|SRSF8_HUMAN (+1)		31 kDa	TRUE	unknown	1	0	3	2
1063	TRUE	Empty	Rho-related GTP-binding protein RhoB OS=Homo sapiens OX=9606 GN=RHOB PE=1 SV=1	RHOB_HUMAN		22 kDa	TRUE	unknown	2	3	2	2
1064	TRUE	Empty	Signal transducer and activator of transcription OS=Homo sapiens OX=9606 GN=STAT1 PE=1 SV=1	J3KPM9_HUMAN (+2)		83 kDa		unknown	2	0	0	0
1065	TRUE	Empty	Golgi pH regulator B (Fragment) OS=Homo sapiens OX=9606 GN=GPR89B PE=4 SV=1	A0A087WW78_HUMAN (+7)		11 kDa		unknown	2	1	0	0
1066	TRUE	Empty	Hepatitis B virus x interacting protein OS=Homo sapiens OX=9606 GN=LAMTOR5 PE=1 SV=1	A0A0C4DGV4_HUMAN (+3)		18 kDa		unknown	1	2	0	0
1067	TRUE	Empty	Endothelin-converting enzyme 1 OS=Homo sapiens OX=9606 GN=ECE1 PE=1 SV=1	B4DKB2_HUMAN (+4)		84 kDa		unknown	0	2	0	0
1068	TRUE	Empty	Ras-related protein Rab-24 OS=Homo sapiens OX=9606 GN=RAB24 PE=1 SV=1	F8W8H5_HUMAN (+1)		20 kDa		unknown	1	2	0	0
1069	TRUE	Empty	G protein-coupled receptor 107, isoform CRA_c OS=Homo sapiens OX=9606 GN=GPR107 PE=1 SV=1	G5E994_HUMAN (+2)		64 kDa		unknown	0	2	0	0
1070	TRUE	Empty	BET1 homolog (Fragment) OS=Homo sapiens OX=9606 GN=BET1 PE=1 SV=1	H7C1N3_HUMAN (+1)		15 kDa		unknown	2	0	0	1
1071	TRUE	Empty	MICAL-like protein 1 OS=Homo sapiens OX=9606 GN=MICALL1 PE=1 SV=2	MILK1_HUMAN		93 kDa	TRUE	unknown	2	2	0	0
1072	TRUE	Empty	Serine/threonine-protein kinase N3 OS=Homo sapiens OX=9606 GN=PKN3 PE=1 SV=1	PKN3_HUMAN		99 kDa		unknown	0	2	0	0
1073	TRUE	Empty	Peroxisomal 2,4-dienoyl-CoA reductase OS=Homo sapiens OX=9606 GN=DECR2 PE=1 SV=1	Q4VXZ8_HUMAN (+2)		29 kDa		unknown	0	2	0	1
1074	TRUE	Empty	40S ribosomal protein S27 OS=Homo sapiens OX=9606 GN=RPS27 PE=1 SV=3	RS27_HUMAN		9 kDa		unknown	0	1	2	0
1075	TRUE	Empty	Splicing factor 3B subunit 4 OS=Homo sapiens OX=9606 GN=SF3B4 PE=1 SV=1	SF3B4_HUMAN		44 kDa		unknown	0	0	2	1
1076	TRUE	Empty	Splicing factor 3B subunit 5 OS=Homo sapiens OX=9606 GN=SF3B5 PE=1 SV=1	SF3B5_HUMAN		10 kDa		unknown	0	0	1	2
1077	TRUE	Empty	CMP-sialic acid transporter OS=Homo sapiens OX=9606 GN=SLC35A1 PE=2 SV=1	sp|P78382|S35A1_HUMAN		37 kDa		unknown	0	2	0	1
1078	TRUE	Empty	Isoform 2 of Myotubularin-related protein 14 OS=Homo sapiens OX=9606 GN=MTMR14	sp|Q8NCE2-2|MTMRE_HUMAN (+1)		67 kDa		unknown	0	0	2	1
1079	TRUE	Empty	Isoform 4 of TRIO and F-actin-binding protein OS=Homo sapiens OX=9606 GN=TRIOBP	sp|Q9H2D6-3|TARA_HUMAN (+1)		243 kDa		unknown	1	2	0	0
1080	TRUE	Empty	Isoform 2 of EH domain-containing protein 2 OS=Homo sapiens OX=9606 GN=EHD2	sp|Q9NZN4-2|EHD2_HUMAN (+1)		46 kDa		unknown	2	0	0	0
1081	TRUE	Empty	YTH domain-containing protein 1 OS=Homo sapiens OX=9606 GN=YTHDC1 PE=1 SV=1	J3QR07_HUMAN		86 kDa		unknown	0	0	2	0
1082	TRUE	Empty	Uncharacterized protein OS=Homo sapiens OX=9606 PE=4 SV=1	A0A087WV05_HUMAN (+1)		13 kDa		unknown	0	1	2	0
1083	TRUE	Empty	Zinc transporter 1 OS=Homo sapiens OX=9606 GN=SLC30A1 PE=1 SV=3	ZNT1_HUMAN		55 kDa		unknown	2	1	0	0
1084	TRUE	Empty	Ral GTPase-activating protein subunit alpha-2 (Fragment) OS=Homo sapiens OX=9606 GN=RALGAPA2 PE=1 SV=1	H7C1F9_HUMAN		195 kDa		unknown	1	2	0	0
1085	TRUE	Empty	Gasdermin-E OS=Homo sapiens OX=9606 GN=GSDME PE=1 SV=2	GSDME_HUMAN (+1)		55 kDa		unknown	0	3	0	0
1086	TRUE	Empty	Neurofibromin OS=Homo sapiens OX=9606 GN=NF1 PE=1 SV=2	sp|P21359|NF1_HUMAN		319 kDa		unknown	0	3	0	0
1087	TRUE	Empty	Neudesin OS=Homo sapiens OX=9606 GN=NENF PE=1 SV=1	NENF_HUMAN		19 kDa		unknown	1	2	0	0
1088	TRUE	Empty	Isoform 2 of AP-1 complex subunit gamma-1 OS=Homo sapiens OX=9606 GN=AP1G1	sp|O43747-2|AP1G1_HUMAN (+1)		92 kDa		unknown	1	2	0	0
1089	TRUE	Empty	V-type proton ATPase 116 kDa subunit a isoform 2 OS=Homo sapiens OX=9606 GN=ATP6V0A2 PE=1 SV=2	VPP2_HUMAN		98 kDa		unknown	2	1	0	0
1090	TRUE	Empty	Serine/threonine-protein kinase 10 OS=Homo sapiens OX=9606 GN=STK10 PE=1 SV=1	STK10_HUMAN		112 kDa		unknown	2	1	0	0
1091	TRUE	Empty	Lysosomal alpha-glucosidase OS=Homo sapiens OX=9606 GN=GAA PE=1 SV=4	LYAG_HUMAN		105 kDa		unknown	0	2	1	0
1092	TRUE	Empty	Long-chain fatty acid transport protein 4 OS=Homo sapiens OX=9606 GN=SLC27A4 PE=1 SV=1	S27A4_HUMAN		72 kDa		unknown	2	0	0	0
1093	TRUE	Empty	Isoform 2 of Arginine and glutamate-rich protein 1 OS=Homo sapiens OX=9606 GN=ARGLU1	sp|Q9NWB6-2|ARGL1_HUMAN (+2)		33 kDa		unknown	0	0	2	1
1094	TRUE	Empty	E3 ubiquitin/ISG15 ligase TRIM25 OS=Homo sapiens OX=9606 GN=TRIM25 PE=1 SV=2	TRI25_HUMAN		71 kDa		unknown	0	0	2	1
1095	TRUE	Empty	Serine/arginine-rich-splicing factor 10 OS=Homo sapiens OX=9606 GN=SRSF10 PE=1 SV=1	Q5JRI1_HUMAN (+6)		21 kDa		unknown	0	0	2	1
1096	TRUE	Empty	Isoform 2 of MAGUK p55 subfamily member 5 OS=Homo sapiens OX=9606 GN=MPP5	sp|Q8N3R9-2|MPP5_HUMAN		73 kDa		unknown	0	2	0	0
1097	TRUE	Empty	Ras-related protein Rab-4A OS=Homo sapiens OX=9606 GN=RAB4A PE=1 SV=3	RAB4A_HUMAN		24 kDa	TRUE	unknown	2	2	0	0
1098	TRUE	Empty	Isoform 2 of Voltage-dependent anion-selective channel protein 3 OS=Homo sapiens OX=9606 GN=VDAC3	sp|Q9Y277-2|VDAC3_HUMAN (+1)		31 kDa		unknown	1	2	0	1
1099	TRUE	Empty	Isoform 2 of 14-3-3 protein sigma OS=Homo sapiens OX=9606 GN=SFN	sp|P31947-2|1433S_HUMAN (+1)		24 kDa	TRUE	unknown	1	4	2	0
1100	TRUE	Empty	Isoform 2 of Melanoma-associated antigen D1 OS=Homo sapiens OX=9606 GN=MAGED1	sp|Q9Y5V3-2|MAGD1_HUMAN (+1)		92 kDa	TRUE	unknown	2	2	0	2
1101	TRUE	Empty	Cluster of Centrosomal protein of 170 kDa (Fragment) OS=Homo sapiens OX=9606 GN=CEP170 PE=1 SV=1 (H0Y2V6_HUMAN)	H0Y2V6_HUMAN [3]		172 kDa	TRUE	unknown	0	2	1	0
1101.1	TRUE	Empty	Centrosomal protein of 170 kDa (Fragment) OS=Homo sapiens OX=9606 GN=CEP170 PE=1 SV=1	H0Y2V6_HUMAN (+1)		172 kDa	TRUE	unknown	0	2	1	0
1101.2	TRUE	Empty	Centrosomal protein of 170 kDa (Fragment) OS=Homo sapiens OX=9606 GN=CEP170 PE=1 SV=1	H0YB92_HUMAN		20 kDa	TRUE	unknown	0	0	0	0
1102	TRUE	Empty	Septin-11 (Fragment) OS=Homo sapiens OX=9606 GN=SEPT11 PE=1 SV=1	D6RDU5_HUMAN (+4)		43 kDa	TRUE	unknown	0	2	0	0
1103	TRUE	Empty	Insulin-like growth factor 2 mRNA-binding protein 2 OS=Homo sapiens OX=9606 GN=IGF2BP2 PE=1 SV=1	F8W930_HUMAN (+2)		67 kDa	TRUE	unknown	0	0	3	0
1104	TRUE	Empty	LIM domain only protein 7 OS=Homo sapiens OX=9606 GN=LMO7 PE=1 SV=1	A0A0A0MTE2_HUMAN (+7)		158 kDa		unknown	0	2	0	0
1105	TRUE	Empty	Phosphatidylinositol 4-phosphate 5-kinase type-1 alpha OS=Homo sapiens OX=9606 GN=PIP5K1A PE=1 SV=2	A6PW57_HUMAN (+4)		61 kDa		unknown	0	2	0	0
1106	TRUE	Empty	Isoform 2 of V-type proton ATPase catalytic subunit A OS=Homo sapiens OX=9606 GN=ATP6V1A	sp|P38606-2|VATA_HUMAN (+1)		65 kDa		unknown	0	2	0	0
1107	TRUE	Empty	Isoform 2 of U5 small nuclear ribonucleoprotein 40 kDa protein OS=Homo sapiens OX=9606 GN=SNRNP40	sp|Q96DI7-2|SNR40_HUMAN (+1)		45 kDa		unknown	0	0	2	0
1108	TRUE	Empty	Eukaryotic translation initiation factor 3 subunit M OS=Homo sapiens OX=9606 GN=EIF3M PE=1 SV=1	E9PRY0_HUMAN (+3)		8 kDa		unknown	0	0	2	0
1109	TRUE	Empty	Rho-related GTP-binding protein RhoF OS=Homo sapiens OX=9606 GN=RHOF PE=1 SV=1	sp|Q9HBH0|RHOF_HUMAN		24 kDa		unknown	0	0	2	0
1110	TRUE	Empty	Isoform 2 of Phospholipid-transporting ATPase IG OS=Homo sapiens OX=9606 GN=ATP11C	sp|Q8NB49-2|AT11C_HUMAN (+3)		127 kDa		unknown	2	0	0	0
1111	TRUE	Empty	DNA-(apurinic or apyrimidinic site) lyase (Fragment) OS=Homo sapiens OX=9606 GN=APEX1 PE=1 SV=1	G3V359_HUMAN (+2)		19 kDa		unknown	0	0	2	0
1112	TRUE	Empty	Isoform 3 of ATP-dependent RNA helicase DHX36 OS=Homo sapiens OX=9606 GN=DHX36	sp|Q9H2U1-3|DHX36_HUMAN (+1)		111 kDa		unknown	0	0	2	0
1113	TRUE	Empty	Polymerase delta-interacting protein 3 OS=Homo sapiens OX=9606 GN=POLDIP3 PE=1 SV=1	F6VRR5_HUMAN (+2)		48 kDa		unknown	0	0	2	0
1114	TRUE	Empty	Isoform 2 of Eukaryotic translation initiation factor 3 subunit A OS=Homo sapiens OX=9606 GN=EIF3A	sp|Q14152-2|EIF3A_HUMAN (+1)		163 kDa		unknown	0	2	0	0
1115	TRUE	Empty	WD repeat-containing protein 44 (Fragment) OS=Homo sapiens OX=9606 GN=WDR44 PE=1 SV=1	H7BY83_HUMAN (+2)		90 kDa		unknown	0	2	0	0
1116	TRUE	Empty	Mitochondrial 2-oxoglutarate/malate carrier protein (Fragment) OS=Homo sapiens OX=9606 GN=SLC25A11 PE=1 SV=1	I3L1P8_HUMAN (+2)		32 kDa		unknown	0	0	0	2
1117	TRUE	Empty	Ras-related protein Rab-3A OS=Homo sapiens OX=9606 GN=RAB3A PE=1 SV=1	RAB3A_HUMAN		25 kDa	TRUE	unknown	3	6	5	3
1118	TRUE	Empty	Scaffold attachment factor B2 OS=Homo sapiens OX=9606 GN=SAFB2 PE=1 SV=1	SAFB2_HUMAN		107 kDa	TRUE	unknown	0	0	2	1
1119	TRUE	Empty	Ras-related protein Rab-3D OS=Homo sapiens OX=9606 GN=RAB3D PE=1 SV=1	RAB3D_HUMAN		24 kDa	TRUE	unknown	2	6	5	3
1120	TRUE	Empty	Dynein light chain 2, cytoplasmic OS=Homo sapiens OX=9606 GN=DYNLL2 PE=1 SV=1	DYL2_HUMAN		10 kDa	TRUE	unknown	2	1	2	1
1121	TRUE	Empty	MICAL-like protein 1 (Fragment) OS=Homo sapiens OX=9606 GN=MICALL1 PE=1 SV=1	H0Y6J8_HUMAN		40 kDa	TRUE	unknown	0	2	0	0
END OF FILE
